# Supplementary material for: Order of magnitude increase in photocatalytic rate for hierarchically porous anatase thin films synthesized from zinc titanate coatings
Source: Royal Society of Chemistry journal article supplement (doi:10.1039/c6dt04431j), 2017-01-01
Supplement: c6dt04431j1.xlsx [file c6dt04431j1.xlsx]

## Sheet: Section A - XRD
Two theta	1:1 Front	2:1 Front	3:1 Front	4:1 Front	5:1 Front	Two theta	1:1 Back	2:1 Back	3:1 Back	4:1 Back	5:1 Back
10	470	807	546	518	600	10	638	638	2674	595	658
10.02	519	783	548	522	535	10.02	612	612	2733	684	632
10.04	513	685	508	528	573	10.04	602	602	2704	618	641
10.06	488	736	545	519	609	10.06	631	631	2486	646	643
10.08	497	744	500	535	570	10.08	592	592	2605	644	653
10.1	537	739	535	496	546	10.1	616	616	2648	669	657
10.12	478	743	545	516	561	10.12	603	603	2586	631	645
10.14	497	681	552	508	556	10.14	567	567	2598	645	644
10.16	462	720	496	541	599	10.16	564	564	2505	646	630
10.18	484	723	532	515	576	10.18	563	563	2610	627	642
10.2	523	747	515	505	575	10.2	539	539	2483	607	682
10.22	521	777	558	465	549	10.22	596	596	2584	593	618
10.24	491	801	500	509	554	10.24	567	567	2593	594	617
10.26	516	711	523	497	547	10.26	555	555	2594	642	624
10.28	489	744	514	521	525	10.28	598	598	2507	591	664
10.3	485	701	457	537	542	10.3	594	594	2565	576	630
10.32	442	746	497	493	530	10.32	571	571	2554	601	618
10.34	456	744	518	531	560	10.34	579	579	2580	687	638
10.36	482	690	544	519	577	10.36	570	570	2552	583	605
10.38	472	698	505	527	558	10.38	570	570	2490	614	604
10.4	507	722	512	517	550	10.4	626	626	2533	637	648
10.42	501	729	541	543	585	10.42	594	594	2507	597	651
10.44	479	747	526	512	561	10.44	586	586	2505	596	628
10.46	450	692	519	518	574	10.46	545	545	2505	627	587
10.48	476	782	580	497	528	10.48	586	586	2553	596	606
10.5	477	696	512	512	512	10.5	592	592	2501	638	625
10.52	474	703	494	515	560	10.52	587	587	2545	601	612
10.54	438	724	500	515	504	10.54	575	575	2468	605	615
10.56	478	691	523	494	556	10.56	565	565	2536	576	632
10.58	459	695	559	487	560	10.58	556	556	2427	577	597
10.6	482	763	501	495	526	10.6	524	524	2506	601	591
10.62	505	682	546	524	582	10.62	569	569	2496	595	594
10.64	461	697	539	486	528	10.64	572	572	2534	552	642
10.66	492	718	486	468	544	10.66	546	546	2537	586	614
10.68	473	735	533	505	568	10.68	555	555	2512	607	627
10.7	464	747	522	483	548	10.7	579	579	2506	639	560
10.72	487	684	482	511	515	10.72	592	592	2474	611	594
10.74	487	726	507	500	485	10.74	555	555	2542	603	577
10.76	484	703	485	494	537	10.76	518	518	2500	599	606
10.78	477	624	527	509	518	10.78	555	555	2503	594	594
10.8	483	669	502	493	573	10.8	550	550	2494	668	598
10.82	489	678	523	520	509	10.82	552	552	2434	547	595
10.84	443	681	512	512	554	10.84	547	547	2458	602	615
10.86	462	713	473	506	528	10.86	582	582	2527	593	633
10.88	474	705	522	469	492	10.88	561	561	2563	603	598
10.9	490	705	519	486	515	10.9	560	560	2534	615	631
10.92	491	680	498	493	512	10.92	587	587	2466	586	560
10.94	462	679	488	515	542	10.94	574	574	2527	581	584
10.96	495	626	547	475	480	10.96	561	561	2498	581	605
10.98	464	703	497	510	512	10.98	560	560	2400	584	621
11	457	674	502	499	468	11	552	552	2568	614	619
11.02	474	687	488	449	496	11.02	588	588	2518	606	585
11.04	455	696	526	487	532	11.04	575	575	2440	571	564
11.06	434	726	522	437	556	11.06	584	584	2506	615	604
11.08	452	728	481	462	520	11.08	518	518	2426	582	659
11.1	466	703	543	480	534	11.1	571	571	2387	559	580
11.12	464	711	516	471	520	11.12	551	551	2417	578	552
11.14	428	747	522	475	492	11.14	557	557	2444	575	600
11.16	448	702	492	487	530	11.16	545	545	2430	583	619
11.18	436	742	495	428	499	11.18	517	517	2460	610	615
11.2	505	680	504	476	521	11.2	533	533	2519	598	531
11.22	479	693	502	436	523	11.22	584	584	2398	575	588
11.24	470	703	549	505	551	11.24	568	568	2347	594	603
11.26	443	698	553	475	498	11.26	572	572	2417	575	608
11.28	438	695	543	462	545	11.28	568	568	2452	604	575
11.3	460	743	543	499	504	11.3	589	589	2407	578	601
11.32	452	681	522	467	561	11.32	576	576	2437	583	581
11.34	447	729	531	453	517	11.34	537	537	2445	598	594
11.36	406	725	509	470	527	11.36	537	537	2414	609	523
11.38	440	731	549	424	519	11.38	566	566	2436	563	565
11.4	444	725	528	516	534	11.4	538	538	2449	543	620
11.42	417	704	573	509	515	11.42	539	539	2322	547	575
11.44	429	732	529	500	530	11.44	556	556	2367	555	566
11.46	479	698	528	461	512	11.46	525	525	2366	567	584
11.48	444	747	515	495	498	11.48	513	513	2448	597	537
11.5	438	721	553	469	521	11.5	548	548	2368	582	565
11.52	480	700	497	430	532	11.52	549	549	2357	587	592
11.54	453	799	516	467	510	11.54	525	525	2415	536	560
11.56	469	662	497	476	516	11.56	583	583	2417	548	561
11.58	421	786	512	497	502	11.58	577	577	2434	564	568
11.6	466	712	494	441	529	11.6	486	486	2412	584	592
11.62	440	746	485	470	517	11.62	548	548	2450	570	516
11.64	447	776	478	428	517	11.64	558	558	2437	569	624
11.66	466	724	496	483	502	11.66	525	525	2425	585	565
11.68	427	699	514	450	501	11.68	527	527	2463	577	541
11.7	453	700	502	470	496	11.7	544	544	2462	552	604
11.72	444	686	463	469	520	11.72	568	568	2458	587	563
11.74	429	720	494	472	502	11.74	510	510	2395	565	557
11.76	440	790	513	452	511	11.76	543	543	2387	580	585
11.78	453	777	504	471	520	11.78	586	586	2406	570	575
11.8	473	774	444	468	471	11.8	547	547	2443	543	566
11.82	417	772	477	462	498	11.82	540	540	2413	585	567
11.84	453	743	498	478	523	11.84	547	547	2323	544	592
11.86	441	725	492	425	480	11.86	566	566	2450	572	568
11.88	460	780	480	427	462	11.88	570	570	2413	568	585
11.9	444	755	459	448	528	11.9	561	561	2381	570	578
11.92	417	684	505	461	507	11.92	543	543	2394	563	575
11.94	443	748	465	429	502	11.94	517	517	2486	539	530
11.96	473	798	497	452	485	11.96	554	554	2432	518	553
11.98	480	734	493	414	482	11.98	534	534	2380	567	579
12	460	781	484	443	510	12	575	575	2391	555	545
12.02	441	755	501	454	497	12.02	547	547	2456	576	543
12.04	439	774	479	446	465	12.04	559	559	2332	562	560
12.06	418	755	482	464	494	12.06	541	541	2410	597	574
12.08	466	800	474	439	492	12.08	580	580	2525	548	559
12.1	448	798	457	454	456	12.1	548	548	2296	559	538
12.12	435	864	485	484	478	12.12	539	539	2367	572	528
12.14	428	826	490	485	488	12.14	529	529	2429	521	557
12.16	448	831	461	457	477	12.16	584	584	2434	564	523
12.18	423	839	484	417	449	12.18	518	518	2320	567	566
12.2	403	808	475	433	472	12.2	581	581	2306	611	538
12.22	414	808	445	479	486	12.22	525	525	2373	552	578
12.24	458	816	459	435	498	12.24	543	543	2446	578	561
12.26	444	868	498	460	516	12.26	539	539	2409	510	553
12.28	420	885	456	461	480	12.28	573	573	2428	564	531
12.3	406	808	468	477	499	12.3	575	575	2473	590	593
12.32	440	788	520	445	468	12.32	570	570	2431	580	532
12.34	446	780	471	467	487	12.34	606	606	2441	567	563
12.36	425	839	489	471	483	12.36	529	529	2296	514	543
12.38	416	840	472	452	477	12.38	573	573	2319	593	560
12.4	430	750	494	410	499	12.4	579	579	2478	584	597
12.42	394	868	472	433	518	12.42	557	557	2327	537	501
12.44	408	847	509	437	512	12.44	537	537	2298	551	558
12.46	397	813	506	429	480	12.46	544	544	2391	556	511
12.48	413	837	481	438	491	12.48	544	544	2355	549	515
12.5	411	829	471	479	474	12.5	537	537	2362	559	550
12.52	419	883	491	455	467	12.52	514	514	2275	549	581
12.54	387	851	453	438	458	12.54	547	547	2364	586	542
12.56	439	874	510	457	473	12.56	529	529	2266	578	526
12.58	417	846	488	433	466	12.58	520	520	2431	547	516
12.6	433	848	464	427	528	12.6	555	555	2315	580	543
12.62	438	839	485	483	494	12.62	547	547	2334	551	558
12.64	460	979	428	475	451	12.64	564	564	2342	550	517
12.66	452	865	486	460	467	12.66	546	546	2410	559	568
12.68	400	869	476	414	472	12.68	577	577	2344	551	523
12.7	403	876	465	435	496	12.7	569	569	2339	601	525
12.72	419	866	530	431	496	12.72	529	529	2270	577	517
12.74	423	865	484	484	476	12.74	555	555	2317	530	561
12.76	414	896	461	439	495	12.76	546	546	2362	562	523
12.78	394	886	445	452	497	12.78	527	527	2309	549	522
12.8	405	937	481	460	514	12.8	537	537	2432	590	529
12.82	426	894	470	433	476	12.82	512	512	2432	549	493
12.84	420	876	505	443	491	12.84	504	504	2391	533	524
12.86	441	901	530	444	425	12.86	545	545	2432	536	536
12.88	418	771	519	459	483	12.88	526	526	2356	529	560
12.9	430	903	464	383	490	12.9	577	577	2453	537	536
12.92	396	874	468	456	457	12.92	510	510	2394	544	597
12.94	428	960	478	417	466	12.94	566	566	2323	539	527
12.96	389	967	496	439	473	12.96	590	590	2346	535	519
12.98	426	959	470	450	503	12.98	549	549	2394	520	577
13	454	885	477	457	479	13	536	536	2450	499	569
13.02	481	924	465	454	516	13.02	555	555	2385	550	564
13.04	387	923	486	454	488	13.04	572	572	2474	556	577
13.06	415	974	479	408	473	13.06	542	542	2355	569	564
13.08	417	999	519	445	447	13.08	559	559	2384	579	530
13.1	397	984	457	431	460	13.1	587	587	2390	541	530
13.12	453	1001	500	445	515	13.12	547	547	2408	569	579
13.14	407	935	482	423	432	13.14	551	551	2456	541	548
13.16	429	939	483	411	493	13.16	556	556	2330	530	578
13.18	429	957	495	448	485	13.18	569	569	2339	552	494
13.2	398	958	497	421	464	13.2	529	529	2438	578	548
13.22	385	986	476	441	412	13.22	540	540	2361	595	536
13.24	429	1014	486	454	441	13.24	566	566	2328	562	530
13.26	424	996	498	456	465	13.26	569	569	2392	535	529
13.28	414	978	467	437	476	13.28	547	547	2426	548	535
13.3	404	981	463	435	509	13.3	555	555	2402	632	515
13.32	413	1014	484	404	489	13.32	535	535	2409	508	483
13.34	410	1005	453	430	526	13.34	516	516	2383	579	516
13.36	399	910	464	421	471	13.36	550	550	2513	559	532
13.38	391	1063	485	414	453	13.38	582	582	2362	587	532
13.4	414	1061	498	416	464	13.4	534	534	2461	563	515
13.42	422	1034	493	433	459	13.42	565	565	2527	574	532
13.44	413	1049	482	404	450	13.44	575	575	2462	585	525
13.46	411	1065	466	439	481	13.46	539	539	2460	591	497
13.48	438	1049	481	406	473	13.48	556	556	2469	566	555
13.5	397	1081	460	414	488	13.5	601	601	2381	556	599
13.52	388	1058	492	431	461	13.52	561	561	2383	543	525
13.54	399	1026	520	422	492	13.54	596	596	2382	573	570
13.56	402	1045	503	462	505	13.56	563	563	2420	569	542
13.58	410	1124	458	420	458	13.58	551	551	2491	568	541
13.6	399	1074	484	431	461	13.6	566	566	2431	573	510
13.62	401	1135	470	425	469	13.62	507	507	2455	552	523
13.64	391	1131	488	414	473	13.64	586	586	2407	539	480
13.66	442	1072	454	416	476	13.66	613	613	2453	567	547
13.68	416	1151	504	432	488	13.68	585	585	2472	582	536
13.7	396	1061	525	411	451	13.7	629	629	2364	564	539
13.72	392	1158	512	457	467	13.72	558	558	2410	549	513
13.74	409	1065	473	445	497	13.74	574	574	2428	569	548
13.76	438	1096	469	434	484	13.76	608	608	2466	566	484
13.78	464	1148	504	416	469	13.78	575	575	2399	577	556
13.8	375	1134	495	419	517	13.8	588	588	2427	573	590
13.82	414	1072	502	448	500	13.82	590	590	2466	560	542
13.84	418	1169	486	426	466	13.84	575	575	2431	552	527
13.86	394	1210	492	445	466	13.86	616	616	2373	564	539
13.88	407	1160	496	403	460	13.88	597	597	2438	528	526
13.9	386	1199	488	400	469	13.9	575	575	2484	604	521
13.92	396	1178	463	410	488	13.92	575	575	2448	540	497
13.94	446	1277	492	417	463	13.94	525	525	2538	557	559
13.96	449	1321	452	419	465	13.96	521	521	2501	548	558
13.98	411	1258	472	426	499	13.98	551	551	2433	562	520
14	456	1328	475	450	466	14	611	611	2436	568	503
14.02	436	1280	489	424	449	14.02	595	595	2494	527	529
14.04	429	1341	506	414	464	14.04	591	591	2452	559	517
14.06	406	1379	529	404	512	14.06	579	579	2497	526	509
14.08	424	1365	474	399	484	14.08	554	554	2428	591	520
14.1	402	1415	511	385	479	14.1	586	586	2539	602	573
14.12	415	1332	500	403	480	14.12	552	552	2502	565	513
14.14	414	1299	475	426	508	14.14	582	582	2414	583	535
14.16	400	1335	476	453	471	14.16	577	577	2546	607	547
14.18	412	1323	531	432	486	14.18	607	607	2472	523	516
14.2	417	1275	471	435	471	14.2	540	540	2514	576	569
14.22	435	1270	514	436	477	14.22	584	584	2484	535	566
14.24	454	1294	492	446	508	14.24	633	633	2397	592	522
14.26	442	1366	476	436	475	14.26	590	590	2488	580	542
14.28	442	1302	454	436	489	14.28	591	591	2597	568	507
14.3	400	1328	519	418	519	14.3	606	606	2476	576	521
14.32	416	1239	483	439	473	14.32	595	595	2487	571	526
14.34	415	1404	500	408	448	14.34	630	630	2408	563	538
14.36	445	1344	473	433	531	14.36	601	601	2523	584	513
14.38	421	1264	480	399	493	14.38	591	591	2511	601	516
14.4	411	1340	478	407	485	14.4	574	574	2504	586	552
14.42	387	1345	512	468	492	14.42	584	584	2491	569	559
14.44	401	1285	477	420	443	14.44	587	587	2462	576	587
14.46	423	1392	492	428	466	14.46	610	610	2524	565	529
14.48	411	1409	518	440	495	14.48	590	590	2597	574	538
14.5	412	1347	493	432	479	14.5	591	591	2605	553	556
14.52	409	1395	471	442	456	14.52	574	574	2519	595	543
14.54	433	1358	490	457	483	14.54	629	629	2444	565	583
14.56	413	1375	450	432	495	14.56	634	634	2568	550	521
14.58	398	1422	493	418	482	14.58	569	569	2565	567	504
14.6	450	1371	532	423	455	14.6	637	637	2595	562	577
14.62	423	1462	481	458	484	14.62	594	594	2606	588	505
14.64	392	1472	503	449	452	14.64	633	633	2638	600	538
14.66	408	1484	477	431	498	14.66	598	598	2652	579	543
14.68	419	1564	473	481	472	14.68	631	631	2595	597	532
14.7	411	1441	473	457	470	14.7	608	608	2572	590	524
14.72	420	1400	468	445	471	14.72	571	571	2617	587	520
14.74	414	1474	502	458	489	14.74	621	621	2602	588	528
14.76	419	1439	494	415	516	14.76	601	601	2581	537	533
14.78	381	1493	546	418	486	14.78	594	594	2611	582	534
14.8	441	1525	499	430	448	14.8	611	611	2534	572	493
14.82	419	1480	517	461	470	14.82	567	567	2627	590	512
14.84	415	1502	519	448	486	14.84	602	602	2646	611	541
14.86	424	1454	535	463	495	14.86	596	596	2691	607	500
14.88	423	1463	506	452	479	14.88	594	594	2541	597	518
14.9	420	1434	493	457	530	14.9	597	597	2584	568	547
14.92	416	1597	519	418	516	14.92	633	633	2618	591	529
14.94	432	1587	511	426	546	14.94	631	631	2633	605	510
14.96	432	1498	509	452	483	14.96	609	609	2620	588	547
14.98	418	1562	504	450	463	14.98	610	610	2619	567	601
15	464	1488	503	437	487	15	614	614	2604	592	602
15.02	454	1538	474	458	502	15.02	598	598	2619	618	520
15.04	450	1602	486	446	465	15.04	620	620	2620	582	565
15.06	409	1541	493	431	493	15.06	678	678	2620	614	530
15.08	409	1606	500	462	507	15.08	615	615	2604	552	562
15.1	429	1600	494	448	529	15.1	638	638	2637	616	599
15.12	443	1686	490	462	514	15.12	632	632	2741	591	554
15.14	435	1580	514	456	476	15.14	627	627	2616	598	534
15.16	420	1646	536	482	522	15.16	585	585	2725	597	519
15.18	430	1570	536	444	508	15.18	692	692	2691	633	523
15.2	427	1648	474	468	506	15.2	668	668	2778	609	547
15.22	426	1718	478	425	464	15.22	597	597	2693	617	558
15.24	450	1723	533	465	461	15.24	653	653	2645	595	521
15.26	397	1620	504	449	489	15.26	650	650	2653	601	536
15.28	446	1684	535	396	502	15.28	657	657	2673	630	536
15.3	409	1669	516	429	527	15.3	621	621	2625	631	575
15.32	481	1650	531	427	514	15.32	622	622	2703	594	558
15.34	462	1678	516	443	505	15.34	613	613	2742	601	553
15.36	435	1649	527	383	519	15.36	635	635	2707	639	527
15.38	434	1682	533	437	495	15.38	687	687	2743	600	551
15.4	486	1716	546	455	476	15.4	651	651	2731	609	569
15.42	466	1693	550	431	502	15.42	657	657	2758	608	555
15.44	451	1708	515	436	505	15.44	657	657	2707	643	564
15.46	429	1685	544	433	532	15.46	664	664	2717	593	606
15.48	462	1802	555	448	487	15.48	632	632	2710	650	552
15.5	425	1684	530	430	464	15.5	670	670	2737	615	579
15.52	430	1839	511	438	516	15.52	652	652	2755	644	562
15.54	408	1656	508	429	514	15.54	713	713	2619	591	526
15.56	433	1759	511	427	538	15.56	672	672	2683	564	553
15.58	474	1741	483	413	487	15.58	626	626	2805	666	552
15.6	446	1699	515	406	508	15.6	638	638	2704	649	546
15.62	434	1741	505	451	508	15.62	647	647	2792	646	580
15.64	421	1750	506	456	516	15.64	670	670	2835	609	536
15.66	412	1807	561	412	513	15.66	606	606	2713	627	545
15.68	403	1844	540	404	514	15.68	643	643	2792	629	557
15.7	433	1737	571	394	486	15.7	681	681	2877	620	562
15.72	420	1828	545	434	492	15.72	652	652	2751	633	547
15.74	412	1860	545	459	477	15.74	656	656	2767	645	553
15.76	421	1739	528	433	481	15.76	657	657	2764	657	557
15.78	409	1820	501	445	526	15.78	670	670	2837	636	566
15.8	437	1770	567	423	525	15.8	720	720	2720	625	559
15.82	425	1816	540	455	513	15.82	656	656	2731	609	551
15.84	388	1856	526	440	520	15.84	700	700	2681	628	587
15.86	424	1883	544	446	519	15.86	663	663	2814	625	549
15.88	473	1858	537	442	512	15.88	696	696	2860	589	591
15.9	432	1866	529	406	556	15.9	683	683	2787	608	601
15.92	433	1866	548	442	487	15.92	682	682	2798	670	600
15.94	466	1793	562	445	504	15.94	645	645	2851	662	610
15.96	431	1836	531	387	499	15.96	676	676	2899	621	575
15.98	449	1893	542	456	527	15.98	694	694	2871	666	551
16	431	1960	531	447	528	16	683	683	2893	634	559
16.02	461	1902	575	476	510	16.02	728	728	2861	669	543
16.04	451	1947	552	450	519	16.04	740	740	2909	667	551
16.06	425	1817	517	459	529	16.06	745	745	2943	643	591
16.08	468	1917	541	472	516	16.08	735	735	2804	631	605
16.1	468	1899	561	452	522	16.1	694	694	2805	680	603
16.12	449	1730	581	422	527	16.12	732	732	2907	630	564
16.14	427	1881	526	432	488	16.14	694	694	2840	604	589
16.16	467	1884	550	457	527	16.16	701	701	2878	623	530
16.18	452	1948	561	398	536	16.18	722	722	2893	656	602
16.2	433	1875	567	405	548	16.2	703	703	2898	706	556
16.22	467	1926	541	430	516	16.22	749	749	2919	644	578
16.24	445	1877	554	435	529	16.24	683	683	2984	694	546
16.26	463	1953	557	471	523	16.26	710	710	2894	647	550
16.28	427	1851	520	448	545	16.28	716	716	2991	688	593
16.3	435	1883	580	453	527	16.3	698	698	2909	664	570
16.32	424	1949	533	435	500	16.32	744	744	2947	650	616
16.34	436	1952	510	429	549	16.34	705	705	2996	701	582
16.36	446	1927	557	461	502	16.36	731	731	2969	657	560
16.38	450	1943	576	441	522	16.38	719	719	2903	632	535
16.4	473	1855	558	465	541	16.4	700	700	2972	679	595
16.42	449	1954	540	472	545	16.42	707	707	2914	684	551
16.44	448	1954	572	465	539	16.44	754	754	2861	665	541
16.46	464	1967	594	461	517	16.46	716	716	3009	650	561
16.48	463	1937	627	447	511	16.48	775	775	2940	626	574
16.5	497	1932	555	407	523	16.5	720	720	2972	698	634
16.52	451	1894	543	440	546	16.52	720	720	3057	653	607
16.54	470	2030	547	454	524	16.54	752	752	3116	666	600
16.56	495	1912	543	436	538	16.56	778	778	2968	695	578
16.58	454	1932	552	413	560	16.58	763	763	3092	678	636
16.6	433	1941	597	459	547	16.6	765	765	3020	718	597
16.62	478	1939	554	478	555	16.62	771	771	3013	652	564
16.64	467	1906	621	485	489	16.64	740	740	3064	649	618
16.66	456	1985	633	447	544	16.66	749	749	2972	680	627
16.68	475	1976	597	460	522	16.68	809	809	3117	648	616
16.7	460	1934	558	460	547	16.7	775	775	3014	716	606
16.72	450	1881	574	489	542	16.72	781	781	3089	656	596
16.74	436	2025	584	411	544	16.74	716	716	3060	681	622
16.76	467	2005	588	487	588	16.76	765	765	3066	684	588
16.78	453	2027	534	427	491	16.78	717	717	2938	710	594
16.8	508	1950	536	437	530	16.8	745	745	3130	671	583
16.82	481	1868	580	487	534	16.82	763	763	3102	688	601
16.84	484	2037	517	475	561	16.84	765	765	3198	709	578
16.86	466	1944	555	469	578	16.86	783	783	3076	665	578
16.88	452	1946	594	477	506	16.88	735	735	3050	678	585
16.9	463	1899	585	478	576	16.9	740	740	2958	706	581
16.92	493	1960	614	445	577	16.92	732	732	3115	728	602
16.94	488	1893	587	442	556	16.94	768	768	3138	704	602
16.96	484	1988	586	463	600	16.96	801	801	3055	698	585
16.98	511	1853	608	437	554	16.98	798	798	3124	716	600
17	524	1996	611	474	618	17	764	764	3060	723	545
17.02	445	1980	577	479	552	17.02	790	790	3250	702	631
17.04	509	1954	632	472	571	17.04	788	788	3121	734	615
17.06	495	1942	622	456	610	17.06	776	776	3172	682	581
17.08	489	1993	595	449	574	17.08	787	787	3199	718	617
17.1	483	1999	581	477	571	17.1	803	803	3180	733	600
17.12	515	2042	585	485	507	17.12	836	836	3187	715	612
17.14	477	2012	576	517	575	17.14	801	801	3191	718	610
17.16	527	1995	615	488	560	17.16	843	843	3246	694	589
17.18	467	1945	560	522	543	17.18	862	862	3240	679	602
17.2	526	2003	616	490	549	17.2	854	854	3263	688	640
17.22	524	1973	597	501	558	17.22	838	838	3231	734	650
17.24	512	2010	570	508	546	17.24	817	817	3222	733	589
17.26	520	1974	594	471	536	17.26	791	791	3256	748	597
17.28	532	1972	599	503	569	17.28	861	861	3223	712	628
17.3	552	2063	565	499	561	17.3	852	852	3313	727	613
17.32	545	2125	633	496	580	17.32	856	856	3219	718	626
17.34	574	1930	591	474	543	17.34	852	852	3356	734	585
17.36	641	1944	639	491	595	17.36	864	864	3235	711	624
17.38	639	2013	637	518	602	17.38	842	842	3346	721	603
17.4	634	2003	616	528	590	17.4	861	861	3361	777	617
17.42	679	1914	627	480	592	17.42	842	842	3404	797	670
17.44	730	1903	640	506	599	17.44	821	821	3335	727	614
17.46	714	1967	612	522	563	17.46	804	804	3350	728	628
17.48	822	2005	571	485	609	17.48	875	875	3341	721	645
17.5	865	1918	650	492	593	17.5	865	865	3436	737	635
17.52	960	1972	609	522	605	17.52	860	860	3480	716	628
17.54	1133	1950	640	525	633	17.54	860	860	3479	767	662
17.56	1195	1880	656	529	598	17.56	836	836	3482	767	629
17.58	1326	1959	633	497	570	17.58	913	913	3409	777	611
17.6	1415	1952	620	496	606	17.6	876	876	3487	757	601
17.62	1544	1963	691	483	586	17.62	794	794	3405	769	600
17.64	1639	1933	643	528	614	17.64	919	919	3472	763	639
17.66	1568	1910	668	536	620	17.66	889	889	3354	742	625
17.68	1566	1932	693	483	598	17.68	851	851	3428	764	593
17.7	1467	1935	605	512	639	17.7	883	883	3457	740	629
17.72	1294	1931	661	487	602	17.72	813	813	3593	757	630
17.74	1135	1991	656	527	671	17.74	907	907	3481	740	637
17.76	970	1848	670	554	614	17.76	852	852	3463	779	571
17.78	903	1835	664	547	638	17.78	841	841	3615	818	655
17.8	748	1980	678	523	660	17.8	877	877	3615	842	621
17.82	628	1892	671	500	630	17.82	889	889	3547	760	628
17.84	645	1936	667	513	594	17.84	841	841	3661	745	680
17.86	625	1861	649	576	651	17.86	884	884	3570	785	702
17.88	554	1899	694	555	628	17.88	837	837	3556	760	692
17.9	514	1922	724	526	669	17.9	870	870	3694	778	683
17.92	545	1848	694	560	628	17.92	853	853	3647	831	642
17.94	585	1923	709	539	600	17.94	934	934	3597	776	645
17.96	587	1795	748	582	701	17.96	865	865	3657	804	661
17.98	613	1896	757	561	702	17.98	908	908	3671	791	657
18	559	1880	711	614	717	18	865	865	3580	759	696
18.02	535	1812	795	654	736	18.02	903	903	3612	814	624
18.04	573	1949	703	617	706	18.04	901	901	3656	790	714
18.06	531	1841	748	655	713	18.06	993	993	3822	801	675
18.08	523	1917	712	674	780	18.08	963	963	3880	793	666
18.1	535	1934	774	656	762	18.1	968	968	3818	782	669
18.12	567	1827	765	731	787	18.12	950	950	3785	825	635
18.14	554	1792	767	697	783	18.14	918	918	3814	791	660
18.16	529	1873	745	743	788	18.16	918	918	3723	762	653
18.18	517	1935	736	745	796	18.18	943	943	3919	813	643
18.2	543	1864	722	748	827	18.2	951	951	3957	781	721
18.22	501	1807	770	721	817	18.22	942	942	3911	779	663
18.24	541	1781	744	752	765	18.24	1026	1026	3854	792	705
18.26	511	1799	753	718	765	18.26	942	942	3995	799	701
18.28	539	1790	697	698	748	18.28	1008	1008	3863	813	675
18.3	567	1793	742	685	706	18.3	957	957	3810	813	688
18.32	567	1841	739	692	743	18.32	958	958	3875	885	662
18.34	521	1781	759	639	738	18.34	889	889	4029	779	662
18.36	524	1842	741	542	697	18.36	963	963	3774	839	621
18.38	542	1761	698	587	713	18.38	958	958	3891	804	689
18.4	538	1891	761	626	701	18.4	976	976	3849	817	702
18.42	555	1844	672	554	670	18.42	1009	1009	3858	811	693
18.44	518	1834	657	565	711	18.44	975	975	3824	828	668
18.46	528	1822	701	526	690	18.46	1042	1042	3951	791	663
18.48	527	1814	727	562	715	18.48	952	952	3802	757	680
18.5	543	1792	743	532	724	18.5	993	993	3900	821	639
18.52	550	1812	740	584	670	18.52	948	948	3817	810	708
18.54	547	1857	731	574	648	18.54	1008	1008	3818	795	686
18.56	535	1749	726	534	700	18.56	977	977	3914	804	665
18.58	549	1839	681	527	678	18.58	977	977	3943	886	682
18.6	531	1820	726	538	710	18.6	995	995	3878	820	725
18.62	576	1891	688	546	692	18.62	965	965	3926	795	711
18.64	548	2011	683	540	710	18.64	1007	1007	3852	873	699
18.66	521	1811	741	541	639	18.66	987	987	4018	850	746
18.68	538	1714	728	539	676	18.68	1005	1005	3874	844	684
18.7	522	1834	728	584	690	18.7	1016	1016	3948	820	691
18.72	514	1781	726	528	686	18.72	1020	1020	4080	850	690
18.74	551	1744	720	537	688	18.74	952	952	3933	869	676
18.76	560	1660	748	553	699	18.76	964	964	3850	887	693
18.78	583	1791	743	557	712	18.78	1006	1006	4048	805	679
18.8	569	1799	795	581	680	18.8	1004	1004	3974	809	639
18.82	589	1767	755	510	644	18.82	1010	1010	3973	855	688
18.84	553	1802	740	496	649	18.84	1028	1028	4059	860	702
18.86	544	1808	757	555	636	18.86	1007	1007	4093	792	666
18.88	536	1849	707	537	678	18.88	987	987	3983	866	690
18.9	574	1756	756	548	723	18.9	1000	1000	4063	841	652
18.92	560	1756	734	551	700	18.92	952	952	4051	876	666
18.94	515	1759	759	561	681	18.94	1032	1032	4002	846	705
18.96	526	1728	732	513	699	18.96	956	956	3890	831	735
18.98	549	1742	735	529	698	18.98	1043	1043	4019	851	705
19	538	1721	751	588	672	19	981	981	4140	846	689
19.02	544	1691	756	550	678	19.02	995	995	4038	853	719
19.04	611	1710	737	565	673	19.04	1028	1028	4109	877	703
19.06	524	1800	757	621	705	19.06	1054	1054	4025	929	696
19.08	582	1698	718	539	686	19.08	1063	1063	4155	841	706
19.1	536	1791	771	524	650	19.1	996	996	4158	881	710
19.12	533	1779	748	519	630	19.12	1020	1020	4090	914	696
19.14	565	1782	731	515	653	19.14	1031	1031	4208	932	706
19.16	555	1745	753	537	710	19.16	1078	1078	4120	891	778
19.18	600	1792	712	565	667	19.18	1096	1096	4093	882	663
19.2	578	1747	789	547	680	19.2	1057	1057	4137	894	668
19.22	613	1705	746	583	665	19.22	1053	1053	4086	858	769
19.24	540	1810	783	576	666	19.24	994	994	4176	906	703
19.26	571	1701	754	555	734	19.26	1073	1073	4094	908	721
19.28	560	1782	729	563	631	19.28	1071	1071	4301	942	695
19.3	572	1684	766	560	644	19.3	1025	1025	4173	885	701
19.32	573	1776	797	534	687	19.32	1065	1065	4319	934	721
19.34	544	1651	761	548	718	19.34	1079	1079	4173	920	745
19.36	589	1594	787	563	666	19.36	1107	1107	4181	909	708
19.38	596	1680	761	527	692	19.38	1074	1074	4265	921	708
19.4	582	1745	744	549	703	19.4	1099	1099	4128	904	722
19.42	567	1737	783	526	743	19.42	1076	1076	4224	909	711
19.44	554	1743	737	559	684	19.44	1023	1023	4201	944	745
19.46	599	1793	722	552	686	19.46	1073	1073	4229	903	789
19.48	581	1863	786	579	727	19.48	1035	1035	4242	898	724
19.5	577	1731	776	555	702	19.5	1096	1096	4255	914	782
19.52	605	1720	761	589	680	19.52	1055	1055	4399	877	700
19.54	608	1623	779	549	681	19.54	1064	1064	4262	945	783
19.56	563	1732	783	541	728	19.56	1112	1112	4333	934	715
19.58	619	1699	817	575	726	19.58	1061	1061	4269	955	712
19.6	597	1839	810	566	692	19.6	1046	1046	4291	950	767
19.62	575	1669	792	565	723	19.62	1111	1111	4405	950	759
19.64	597	1721	743	607	765	19.64	1140	1140	4447	897	764
19.66	583	1807	740	564	741	19.66	1112	1112	4304	894	766
19.68	605	1752	805	511	761	19.68	1117	1117	4477	882	745
19.7	605	1772	820	562	728	19.7	1088	1088	4359	963	749
19.72	550	1874	813	572	768	19.72	1074	1074	4405	963	746
19.74	551	1757	811	561	725	19.74	1118	1118	4516	982	749
19.76	572	1874	815	514	739	19.76	1126	1126	4428	952	772
19.78	592	1909	757	577	692	19.78	1155	1155	4420	954	758
19.8	578	2052	754	594	698	19.8	1051	1051	4465	942	766
19.82	623	2066	830	572	725	19.82	1122	1122	4422	938	769
19.84	608	2377	761	599	670	19.84	1099	1099	4419	992	762
19.86	641	2584	836	583	683	19.86	1148	1148	4487	1007	738
19.88	627	2838	783	564	735	19.88	1150	1150	4492	973	774
19.9	607	2984	797	585	738	19.9	1170	1170	4646	963	740
19.92	586	3265	801	563	767	19.92	1148	1148	4518	953	730
19.94	599	3060	826	570	745	19.94	1170	1170	4417	953	808
19.96	595	2860	833	583	719	19.96	1143	1143	4586	1019	838
19.98	600	2742	833	605	746	19.98	1137	1137	4588	999	795
20	585	2376	828	601	699	20	1120	1120	4540	954	788
20.02	612	2191	845	615	738	20.02	1174	1174	4594	997	774
20.04	621	2045	840	544	669	20.04	1140	1140	4556	913	758
20.06	591	1855	838	560	736	20.06	1139	1139	4530	929	800
20.08	622	1766	900	547	779	20.08	1155	1155	4665	1011	753
20.1	613	1761	874	564	732	20.1	1164	1164	4672	975	800
20.12	612	1677	862	609	745	20.12	1202	1202	4598	981	760
20.14	612	1722	815	563	812	20.14	1204	1204	4536	1032	724
20.16	639	1722	811	598	736	20.16	1152	1152	4646	914	746
20.18	624	1719	843	589	757	20.18	1196	1196	4567	955	754
20.2	597	1688	849	582	737	20.2	1124	1124	4754	999	791
20.22	613	1671	825	561	720	20.22	1171	1171	4604	981	779
20.24	596	1669	843	607	761	20.24	1095	1095	4525	979	796
20.26	602	1648	869	618	781	20.26	1205	1205	4640	937	782
20.28	620	1660	808	576	794	20.28	1200	1200	4686	985	840
20.3	611	1643	820	586	760	20.3	1194	1194	4791	990	814
20.32	619	1439	832	565	734	20.32	1170	1170	4664	1007	810
20.34	645	1597	826	629	757	20.34	1163	1163	4665	1028	793
20.36	634	1608	847	553	772	20.36	1242	1242	4733	1026	805
20.38	628	1568	886	580	736	20.38	1115	1115	4944	1043	836
20.4	605	1648	866	598	755	20.4	1156	1156	4731	947	791
20.42	652	1645	827	619	828	20.42	1192	1192	4721	978	756
20.44	580	1658	833	617	756	20.44	1126	1126	4725	1036	799
20.46	629	1520	877	571	761	20.46	1202	1202	4802	1065	814
20.48	615	1583	887	625	826	20.48	1156	1156	4679	1014	806
20.5	619	1585	853	622	722	20.5	1277	1277	4857	997	783
20.52	673	1657	863	570	759	20.52	1205	1205	4754	1002	822
20.54	662	1547	840	574	816	20.54	1234	1234	4812	1018	815
20.56	624	1623	867	581	736	20.56	1214	1214	4737	968	787
20.58	626	1541	877	578	786	20.58	1184	1184	4929	1048	768
20.6	646	1597	885	625	798	20.6	1235	1235	4724	1018	809
20.62	645	1571	889	668	757	20.62	1197	1197	4819	992	808
20.64	660	1558	842	603	786	20.64	1188	1188	4798	972	845
20.66	623	1571	854	609	759	20.66	1174	1174	4773	1058	819
20.68	613	1581	831	597	789	20.68	1262	1262	4924	1078	846
20.7	641	1521	885	601	763	20.7	1240	1240	4880	1027	816
20.72	668	1533	868	632	730	20.72	1265	1265	5013	990	813
20.74	656	1572	900	645	778	20.74	1282	1282	4858	1029	785
20.76	612	1468	872	594	789	20.76	1218	1218	5022	1110	833
20.78	643	1537	922	602	776	20.78	1230	1230	4937	1072	752
20.8	671	1420	946	600	780	20.8	1263	1263	4969	1004	833
20.82	658	1548	954	623	732	20.82	1240	1240	5012	1070	830
20.84	643	1498	885	623	771	20.84	1287	1287	4895	1040	839
20.86	673	1557	913	635	789	20.86	1233	1233	4771	1019	830
20.88	642	1548	895	625	822	20.88	1241	1241	5034	1048	858
20.9	654	1562	905	615	791	20.9	1212	1212	4983	1085	745
20.92	632	1539	882	580	817	20.92	1260	1260	4986	1045	787
20.94	657	1577	978	631	764	20.94	1277	1277	4947	1029	821
20.96	683	1509	901	662	815	20.96	1246	1246	5016	1025	830
20.98	620	1507	935	637	747	20.98	1271	1271	4984	1116	850
21	648	1503	903	612	786	21	1246	1246	4990	1068	812
21.02	643	1517	896	622	836	21.02	1230	1230	5029	1055	784
21.04	646	1409	909	630	795	21.04	1308	1308	5055	1076	844
21.06	686	1554	965	611	794	21.06	1297	1297	5088	1007	832
21.08	668	1468	904	612	836	21.08	1348	1348	5023	1079	851
21.1	651	1421	898	654	802	21.1	1286	1286	4868	1056	853
21.12	646	1438	999	604	801	21.12	1281	1281	4972	1041	794
21.14	667	1512	918	656	840	21.14	1286	1286	4967	1060	818
21.16	605	1481	970	638	842	21.16	1271	1271	5111	1025	856
21.18	641	1481	958	592	830	21.18	1322	1322	5087	1079	810
21.2	678	1428	926	614	770	21.2	1324	1324	5110	1005	853
21.22	647	1466	935	604	859	21.22	1285	1285	5030	1092	838
21.24	650	1468	973	638	852	21.24	1298	1298	5098	1078	827
21.26	674	1478	961	654	772	21.26	1223	1223	5092	1078	792
21.28	688	1496	961	662	853	21.28	1270	1270	5033	1096	874
21.3	666	1409	967	674	819	21.3	1292	1292	5117	1032	853
21.32	658	1428	868	651	870	21.32	1310	1310	5153	1133	830
21.34	672	1413	948	625	775	21.34	1332	1332	5258	1108	885
21.36	682	1501	911	642	868	21.36	1298	1298	5208	1083	864
21.38	663	1403	917	663	861	21.38	1293	1293	5096	1087	844
21.4	695	1374	983	650	827	21.4	1289	1289	5180	1058	901
21.42	625	1411	939	629	795	21.42	1246	1246	5091	1100	850
21.44	648	1453	917	618	847	21.44	1396	1396	5187	1072	842
21.46	670	1422	940	597	848	21.46	1330	1330	5221	1095	871
21.48	675	1413	994	658	830	21.48	1331	1331	5160	1111	868
21.5	658	1394	899	669	868	21.5	1382	1382	5156	1153	882
21.52	699	1518	940	634	814	21.52	1289	1289	5317	1094	878
21.54	679	1442	941	643	864	21.54	1292	1292	5266	1014	860
21.56	701	1468	941	656	813	21.56	1323	1323	5198	1149	850
21.58	625	1398	972	651	814	21.58	1384	1384	5287	1140	858
21.6	662	1489	984	613	822	21.6	1347	1347	5256	1068	884
21.62	651	1411	927	642	825	21.62	1324	1324	5178	1115	867
21.64	660	1366	952	690	797	21.64	1335	1335	5291	1097	854
21.66	726	1481	907	702	835	21.66	1352	1352	5147	1098	845
21.68	675	1352	968	678	835	21.68	1384	1384	5243	1137	903
21.7	698	1403	929	695	842	21.7	1327	1327	5372	1090	891
21.72	673	1401	967	670	824	21.72	1248	1248	5272	1116	858
21.74	642	1450	1028	617	908	21.74	1362	1362	5176	1092	862
21.76	714	1385	993	663	857	21.76	1331	1331	5311	1163	891
21.78	692	1464	921	665	886	21.78	1321	1321	5330	1125	897
21.8	715	1464	969	685	822	21.8	1291	1291	5421	1175	891
21.82	664	1454	937	623	835	21.82	1378	1378	5338	1129	848
21.84	704	1413	941	634	872	21.84	1412	1412	5341	1115	886
21.86	692	1481	923	666	776	21.86	1375	1375	5382	1184	865
21.88	724	1454	938	653	834	21.88	1331	1331	5282	1154	913
21.9	717	1408	964	676	841	21.9	1397	1397	5414	1149	855
21.92	697	1430	951	662	824	21.92	1371	1371	5424	1155	876
21.94	688	1384	982	644	883	21.94	1458	1458	5580	1157	881
21.96	765	1400	1008	683	856	21.96	1407	1407	5348	1101	909
21.98	685	1441	956	654	872	21.98	1376	1376	5434	1106	879
22	680	1317	951	650	883	22	1343	1343	5425	1089	907
22.02	691	1465	974	681	868	22.02	1313	1313	5510	1073	985
22.04	672	1454	992	664	892	22.04	1390	1390	5364	1119	943
22.06	709	1415	972	662	829	22.06	1412	1412	5274	1153	942
22.08	751	1417	954	642	900	22.08	1367	1367	5372	1161	904
22.1	700	1470	999	665	835	22.1	1395	1395	5534	1104	869
22.12	629	1336	928	601	852	22.12	1354	1354	5586	1085	884
22.14	696	1438	986	676	904	22.14	1361	1361	5511	1134	893
22.16	685	1452	979	693	857	22.16	1351	1351	5493	1129	857
22.18	689	1475	993	653	860	22.18	1418	1418	5475	1113	976
22.2	747	1489	1013	667	846	22.2	1366	1366	5380	1167	932
22.22	729	1511	1034	654	883	22.22	1352	1352	5499	1140	890
22.24	658	1581	974	704	840	22.24	1336	1336	5439	1101	916
22.26	649	1570	944	705	868	22.26	1339	1339	5471	1210	878
22.28	698	1633	990	675	818	22.28	1342	1342	5508	1173	874
22.3	727	1728	943	670	837	22.3	1438	1438	5539	1172	887
22.32	695	1695	952	632	871	22.32	1355	1355	5494	1131	913
22.34	717	1777	1027	658	850	22.34	1361	1361	5608	1145	906
22.36	708	1976	975	682	876	22.36	1413	1413	5647	1140	935
22.38	686	2047	977	683	873	22.38	1456	1456	5535	1104	948
22.4	689	2219	975	640	824	22.4	1411	1411	5488	1138	916
22.42	685	2545	949	658	831	22.42	1456	1456	5486	1138	909
22.44	727	2932	1040	618	866	22.44	1457	1457	5495	1179	942
22.46	734	3676	1006	689	867	22.46	1386	1386	5534	1203	929
22.48	692	4413	960	689	882	22.48	1415	1415	5538	1183	894
22.5	734	5441	938	686	867	22.5	1391	1391	5574	1141	925
22.52	759	6647	1049	691	866	22.52	1344	1344	5499	1157	868
22.54	706	7900	989	662	884	22.54	1444	1444	5601	1162	867
22.56	720	8624	1004	649	876	22.56	1382	1382	5506	1128	930
22.58	696	9156	1040	689	895	22.58	1377	1377	5693	1150	966
22.6	717	8921	1031	654	897	22.6	1382	1382	5684	1187	909
22.62	684	8300	1036	669	865	22.62	1440	1440	5508	1123	968
22.64	742	7146	1050	676	850	22.64	1478	1478	5663	1166	892
22.66	689	5836	978	681	870	22.66	1421	1421	5469	1161	928
22.68	725	4527	1057	657	880	22.68	1407	1407	5563	1189	912
22.7	719	3474	1035	686	884	22.7	1400	1400	5638	1206	943
22.72	710	2720	1017	704	901	22.72	1417	1417	5574	1134	937
22.74	744	2231	1046	703	862	22.74	1413	1413	5609	1232	925
22.76	751	1971	1014	726	846	22.76	1449	1449	5690	1200	890
22.78	711	1817	980	698	843	22.78	1459	1459	5463	1151	942
22.8	755	1751	1061	658	887	22.8	1420	1420	5676	1180	973
22.82	691	1564	1023	690	895	22.82	1377	1377	5765	1192	949
22.84	695	1509	939	668	901	22.84	1463	1463	5504	1199	927
22.86	697	1428	981	670	911	22.86	1464	1464	5595	1097	942
22.88	698	1401	1023	690	922	22.88	1348	1348	5683	1193	932
22.9	707	1389	993	708	896	22.9	1466	1466	5793	1230	895
22.92	691	1403	1056	697	914	22.92	1460	1460	5586	1181	921
22.94	739	1409	1022	646	863	22.94	1462	1462	5739	1207	989
22.96	741	1344	1046	656	899	22.96	1404	1404	5667	1177	886
22.98	726	1334	1050	710	906	22.98	1466	1466	5752	1162	898
23	687	1325	1032	715	919	23	1452	1452	5792	1181	923
23.02	709	1283	993	668	858	23.02	1387	1387	5712	1187	940
23.04	700	1313	1101	681	896	23.04	1341	1341	5727	1211	964
23.06	721	1250	1095	699	904	23.06	1475	1475	5701	1158	957
23.08	727	1237	1000	673	918	23.08	1375	1375	5722	1234	892
23.1	738	1258	1040	651	849	23.1	1480	1480	5633	1175	946
23.12	745	1264	1051	682	953	23.12	1426	1426	5818	1198	958
23.14	745	1172	1000	709	879	23.14	1433	1433	5739	1172	933
23.16	729	1176	965	688	889	23.16	1432	1432	5773	1214	906
23.18	729	1143	1086	633	880	23.18	1455	1455	5733	1200	976
23.2	712	1158	1121	688	988	23.2	1416	1416	5715	1226	992
23.22	747	1175	1001	730	898	23.22	1491	1491	5667	1127	947
23.24	751	1173	1047	687	943	23.24	1435	1435	5698	1238	885
23.26	780	1188	1034	697	879	23.26	1489	1489	5778	1229	876
23.28	716	1141	1091	721	964	23.28	1499	1499	5883	1163	1016
23.3	705	1180	1103	720	902	23.3	1435	1435	5721	1256	879
23.32	736	1167	1048	681	895	23.32	1439	1439	5720	1188	966
23.34	750	1254	1046	734	884	23.34	1423	1423	5642	1189	933
23.36	710	1263	1086	734	889	23.36	1510	1510	5844	1198	968
23.38	753	1252	1065	711	945	23.38	1457	1457	5779	1232	977
23.4	672	1130	1100	738	909	23.4	1482	1482	5832	1223	978
23.42	730	1189	1067	695	943	23.42	1489	1489	5714	1205	941
23.44	671	1084	1063	681	880	23.44	1438	1438	5763	1158	987
23.46	741	1107	1186	675	892	23.46	1448	1448	5755	1177	958
23.48	733	1114	1175	691	926	23.48	1525	1525	5656	1188	942
23.5	746	1051	1137	688	923	23.5	1429	1429	5735	1191	957
23.52	725	1030	1078	713	916	23.52	1469	1469	5748	1177	929
23.54	686	1097	1128	752	913	23.54	1463	1463	5763	1210	949
23.56	712	1005	1133	735	887	23.56	1448	1448	5859	1158	933
23.58	747	970	1234	751	902	23.58	1447	1447	5718	1161	956
23.6	707	1007	1165	665	891	23.6	1448	1448	5825	1211	964
23.62	696	1024	1203	729	861	23.62	1444	1444	5931	1176	994
23.64	704	1022	1248	731	902	23.64	1446	1446	5952	1215	908
23.66	742	1033	1221	748	888	23.66	1474	1474	5746	1201	925
23.68	724	890	1225	684	978	23.68	1471	1471	5782	1218	962
23.7	725	952	1211	701	881	23.7	1446	1446	5746	1089	990
23.72	761	953	1265	717	907	23.72	1434	1434	5760	1162	967
23.74	759	958	1319	722	862	23.74	1438	1438	5666	1178	939
23.76	708	939	1202	734	928	23.76	1442	1442	5853	1157	982
23.78	702	918	1271	695	856	23.78	1466	1466	5823	1258	906
23.8	710	942	1281	744	939	23.8	1451	1451	5750	1165	911
23.82	780	913	1345	725	906	23.82	1512	1512	5837	1100	943
23.84	771	887	1332	719	865	23.84	1416	1416	5914	1210	980
23.86	725	952	1325	737	901	23.86	1522	1522	5771	1270	983
23.88	740	904	1390	709	935	23.88	1425	1425	5868	1170	983
23.9	751	996	1305	719	875	23.9	1445	1445	5791	1196	942
23.92	715	879	1371	673	854	23.92	1448	1448	5908	1213	961
23.94	768	947	1334	691	946	23.94	1416	1416	5759	1248	901
23.96	702	857	1386	726	923	23.96	1492	1492	5871	1226	958
23.98	723	913	1434	736	927	23.98	1516	1516	5895	1192	934
24	768	908	1383	714	890	24	1429	1429	5795	1186	948
24.02	754	854	1364	655	891	24.02	1473	1473	5791	1225	961
24.04	726	909	1295	708	915	24.04	1487	1487	5793	1197	961
24.06	699	880	1298	689	885	24.06	1444	1444	5773	1169	983
24.08	753	860	1312	731	973	24.08	1481	1481	5797	1155	969
24.1	725	939	1283	732	877	24.1	1522	1522	5782	1149	909
24.12	739	874	1256	660	898	24.12	1407	1407	5754	1185	930
24.14	728	867	1273	685	936	24.14	1424	1424	5839	1221	959
24.16	781	901	1257	690	861	24.16	1439	1439	5824	1190	945
24.18	714	882	1241	706	945	24.18	1412	1412	5826	1145	957
24.2	721	896	1291	767	980	24.2	1396	1396	5840	1173	990
24.22	713	806	1162	730	945	24.22	1502	1502	5777	1203	939
24.24	745	889	1172	670	907	24.24	1470	1470	5937	1207	960
24.26	746	860	1168	700	911	24.26	1447	1447	5905	1243	1001
24.28	790	894	1119	707	885	24.28	1430	1430	5619	1140	961
24.3	732	868	1221	694	934	24.3	1430	1430	5744	1178	958
24.32	702	848	1186	714	930	24.32	1461	1461	5722	1198	968
24.34	769	894	1134	687	909	24.34	1374	1374	5856	1204	930
24.36	763	849	1111	735	908	24.36	1424	1424	5783	1223	941
24.38	743	801	1139	682	897	24.38	1441	1441	5699	1191	956
24.4	769	861	1086	714	832	24.4	1465	1465	5889	1232	967
24.42	734	850	1123	744	870	24.42	1444	1444	5782	1158	908
24.44	787	816	1101	690	875	24.44	1437	1437	5778	1189	921
24.46	697	849	1089	674	911	24.46	1483	1483	5822	1188	957
24.48	753	866	1067	660	911	24.48	1488	1488	5724	1205	944
24.5	725	812	1126	705	878	24.5	1407	1407	5693	1165	905
24.52	724	929	1066	705	871	24.52	1436	1436	5889	1122	960
24.54	781	863	1048	685	960	24.54	1448	1448	5773	1164	956
24.56	747	797	1131	677	915	24.56	1454	1454	5854	1220	973
24.58	772	869	1041	703	856	24.58	1434	1434	5678	1171	986
24.6	764	831	1076	684	915	24.6	1463	1463	5755	1177	988
24.62	743	828	1042	708	889	24.62	1461	1461	5777	1243	953
24.64	725	801	1056	652	908	24.64	1466	1466	5664	1128	1005
24.66	750	832	1064	685	903	24.66	1462	1462	5810	1184	942
24.68	770	795	1061	699	882	24.68	1394	1394	5766	1178	1005
24.7	766	871	953	703	944	24.7	1433	1433	5782	1183	966
24.72	796	856	1072	673	867	24.72	1449	1449	5779	1174	978
24.74	731	893	1045	694	914	24.74	1478	1478	5712	1137	963
24.76	783	805	985	705	934	24.76	1437	1437	5809	1148	992
24.78	741	876	1059	665	884	24.78	1465	1465	5885	1159	954
24.8	762	849	1061	702	910	24.8	1389	1389	5799	1161	983
24.82	815	869	1048	709	916	24.82	1402	1402	5606	1214	961
24.84	761	814	1084	674	906	24.84	1484	1484	5755	1177	986
24.86	733	747	1051	704	921	24.86	1503	1503	5630	1175	977
24.88	782	784	1042	706	971	24.88	1411	1411	5661	1124	951
24.9	757	873	1023	745	888	24.9	1438	1438	5814	1200	970
24.92	720	826	1071	706	947	24.92	1453	1453	5764	1186	986
24.94	818	817	1044	689	890	24.94	1355	1355	5861	1195	927
24.96	845	825	1030	683	918	24.96	1325	1325	5746	1171	965
24.98	806	826	1060	756	865	24.98	1440	1440	5784	1173	991
25	821	803	1024	687	935	25	1438	1438	5763	1150	973
25.02	786	810	1016	649	851	25.02	1449	1449	5777	1193	944
25.04	821	798	1000	696	905	25.04	1509	1509	5719	1145	991
25.06	802	873	1004	672	933	25.06	1421	1421	5638	1185	997
25.08	875	816	1013	665	905	25.08	1386	1386	5737	1178	991
25.1	856	829	1037	670	898	25.1	1417	1417	5845	1177	1012
25.12	854	853	1043	743	911	25.12	1447	1447	5827	1153	952
25.14	878	808	1029	640	910	25.14	1489	1489	5866	1145	1018
25.16	880	790	961	718	906	25.16	1474	1474	5693	1223	979
25.18	925	837	1040	688	882	25.18	1449	1449	5579	1167	913
25.2	921	821	1018	690	902	25.2	1477	1477	5712	1184	890
25.22	949	811	1003	705	942	25.22	1420	1420	5834	1205	974
25.24	974	923	1066	691	916	25.24	1426	1426	5699	1125	968
25.26	952	798	1037	688	882	25.26	1472	1472	5703	1213	984
25.28	1009	854	1024	688	948	25.28	1408	1408	5775	1159	943
25.3	992	830	985	683	913	25.3	1412	1412	5563	1149	950
25.32	1095	823	1024	660	951	25.32	1429	1429	5707	1199	935
25.34	1099	806	952	704	918	25.34	1442	1442	5661	1227	986
25.36	1100	777	1032	690	889	25.36	1421	1421	5610	1164	912
25.38	1069	816	989	672	908	25.38	1462	1462	5688	1168	919
25.4	1181	800	983	696	900	25.4	1416	1416	5662	1120	990
25.42	1235	877	1000	642	930	25.42	1393	1393	5700	1153	926
25.44	1329	779	1042	661	919	25.44	1389	1389	5717	1170	985
25.46	1443	838	1008	677	908	25.46	1397	1397	5759	1154	948
25.48	1656	830	985	696	893	25.48	1432	1432	5732	1134	940
25.5	1924	865	1039	702	825	25.5	1464	1464	5727	1176	949
25.52	2411	805	1022	677	936	25.52	1380	1380	5801	1188	913
25.54	2879	863	1028	704	931	25.54	1430	1430	5660	1175	969
25.56	3790	860	1002	665	914	25.56	1465	1465	5712	1182	940
25.58	4770	835	1023	674	933	25.58	1411	1411	5646	1154	953
25.6	5770	755	975	682	855	25.6	1382	1382	5536	1142	972
25.62	6889	853	986	664	867	25.62	1403	1403	5677	1133	1021
25.64	8035	850	962	710	867	25.64	1393	1393	5569	1206	937
25.66	9079	851	1014	673	906	25.66	1386	1386	5749	1109	956
25.68	9722	858	990	708	910	25.68	1421	1421	5499	1230	973
25.7	10080	801	1016	687	926	25.7	1421	1421	5610	1219	982
25.72	10288	844	986	663	903	25.72	1492	1492	5724	1123	949
25.74	10361	806	999	715	911	25.74	1462	1462	5736	1163	957
25.76	10088	844	982	685	954	25.76	1407	1407	5597	1168	945
25.78	9211	840	1042	700	922	25.78	1378	1378	5621	1175	986
25.8	8330	800	1001	757	926	25.8	1425	1425	5499	1199	965
25.82	6904	807	1024	698	920	25.82	1460	1460	5538	1166	1001
25.84	5598	739	974	688	914	25.84	1429	1429	5802	1183	951
25.86	4565	840	973	712	907	25.86	1423	1423	5639	1234	941
25.88	3353	815	949	703	870	25.88	1367	1367	5475	1143	957
25.9	2623	878	994	697	905	25.9	1418	1418	5548	1127	977
25.92	1903	819	953	728	927	25.92	1477	1477	5580	1102	934
25.94	1537	835	962	698	974	25.94	1420	1420	5585	1201	972
25.96	1283	819	948	694	931	25.96	1474	1474	5612	1154	959
25.98	1123	812	966	685	899	25.98	1416	1416	5665	1172	1032
26	982	897	969	673	939	26	1394	1394	5609	1230	974
26.02	926	866	971	725	886	26.02	1359	1359	5680	1189	962
26.04	938	894	1017	691	916	26.04	1393	1393	5589	1193	955
26.06	900	874	974	698	915	26.06	1388	1388	5581	1151	957
26.08	895	902	988	703	863	26.08	1372	1372	5535	1155	979
26.1	860	905	1035	705	898	26.1	1367	1367	5720	1173	972
26.12	865	929	1030	704	895	26.12	1453	1453	5494	1171	977
26.14	879	976	1023	665	873	26.14	1395	1395	5510	1108	981
26.16	830	990	918	655	919	26.16	1386	1386	5570	1161	961
26.18	788	1022	987	643	869	26.18	1413	1413	5475	1134	991
26.2	780	1045	964	696	915	26.2	1401	1401	5671	1169	935
26.22	754	1183	983	680	911	26.22	1383	1383	5584	1119	925
26.24	747	1307	996	715	850	26.24	1361	1361	5533	1152	949
26.26	803	1436	974	678	887	26.26	1375	1375	5579	1127	953
26.28	782	1623	940	683	885	26.28	1400	1400	5592	1183	956
26.3	760	1876	949	680	883	26.3	1371	1371	5590	1208	999
26.32	773	2024	1042	675	882	26.32	1371	1371	5585	1128	938
26.34	760	2185	1005	685	861	26.34	1366	1366	5468	1160	999
26.36	753	2332	949	706	890	26.36	1414	1414	5564	1152	912
26.38	735	2445	984	640	892	26.38	1418	1418	5513	1197	993
26.4	748	2414	996	697	897	26.4	1370	1370	5484	1171	952
26.42	758	2230	978	668	838	26.42	1379	1379	5595	1145	1010
26.44	777	2052	967	691	914	26.44	1381	1381	5551	1189	998
26.46	732	1783	933	732	959	26.46	1344	1344	5491	1175	980
26.48	764	1495	928	666	887	26.48	1364	1364	5593	1173	926
26.5	738	1274	978	691	922	26.5	1374	1374	5587	1141	989
26.52	765	1164	1033	706	856	26.52	1428	1428	5565	1204	936
26.54	749	1027	959	667	908	26.54	1314	1314	5393	1166	1016
26.56	733	989	991	634	915	26.56	1361	1361	5511	1192	908
26.58	729	972	990	692	905	26.58	1448	1448	5428	1198	945
26.6	739	917	939	681	886	26.6	1365	1365	5412	1144	998
26.62	747	906	943	650	963	26.62	1395	1395	5475	1158	1065
26.64	734	846	962	712	910	26.64	1346	1346	5587	1126	992
26.66	717	856	999	697	888	26.66	1354	1354	5445	1154	975
26.68	729	910	933	702	864	26.68	1372	1372	5425	1155	1033
26.7	738	898	970	668	927	26.7	1383	1383	5499	1132	986
26.72	699	852	948	667	947	26.72	1398	1398	5495	1141	943
26.74	721	849	954	661	939	26.74	1355	1355	5311	1120	1014
26.76	692	829	937	679	921	26.76	1347	1347	5445	1086	996
26.78	759	803	1014	706	897	26.78	1318	1318	5454	1131	1013
26.8	734	711	927	700	902	26.8	1410	1410	5392	1104	949
26.82	701	841	929	688	913	26.82	1362	1362	5601	1193	989
26.84	734	818	959	659	894	26.84	1407	1407	5448	1128	960
26.86	754	890	968	649	922	26.86	1342	1342	5600	1173	999
26.88	714	832	918	654	882	26.88	1316	1316	5447	1174	973
26.9	673	809	929	659	909	26.9	1333	1333	5462	1187	970
26.92	732	821	922	669	913	26.92	1326	1326	5511	1110	946
26.94	774	813	923	654	879	26.94	1324	1324	5478	1169	1012
26.96	724	837	959	711	896	26.96	1379	1379	5388	1153	1037
26.98	741	834	906	705	901	26.98	1365	1365	5542	1197	1013
27	748	780	918	675	871	27	1371	1371	5461	1175	1015
27.02	719	793	949	695	908	27.02	1304	1304	5476	1101	1042
27.04	805	904	999	715	929	27.04	1392	1392	5331	1165	1015
27.06	744	786	956	671	896	27.06	1306	1306	5355	1117	954
27.08	715	781	1020	706	873	27.08	1377	1377	5414	1154	928
27.1	757	807	992	678	882	27.1	1374	1374	5457	1171	953
27.12	751	813	925	685	858	27.12	1297	1297	5499	1160	979
27.14	732	791	960	657	926	27.14	1322	1322	5394	1164	935
27.16	777	694	976	704	933	27.16	1359	1359	5466	1076	946
27.18	773	809	990	694	899	27.18	1347	1347	5397	1116	969
27.2	754	803	965	678	891	27.2	1422	1422	5379	1151	933
27.22	777	809	960	672	873	27.22	1301	1301	5429	1124	984
27.24	760	817	984	665	947	27.24	1353	1353	5540	1149	1017
27.26	778	802	972	669	932	27.26	1349	1349	5532	1183	1010
27.28	743	828	955	658	913	27.28	1281	1281	5461	1131	956
27.3	781	776	989	728	888	27.3	1384	1384	5434	1147	988
27.32	722	770	971	694	889	27.32	1331	1331	5500	1147	971
27.34	712	796	990	684	870	27.34	1371	1371	5563	1128	1027
27.36	705	769	1028	649	887	27.36	1297	1297	5443	1159	1032
27.38	696	812	947	649	944	27.38	1300	1300	5299	1178	1034
27.4	684	698	1051	681	912	27.4	1407	1407	5336	1113	954
27.42	722	791	981	667	969	27.42	1320	1320	5327	1174	970
27.44	711	774	995	660	916	27.44	1329	1329	5532	1200	947
27.46	703	753	982	650	902	27.46	1338	1338	5469	1095	977
27.48	706	790	993	677	913	27.48	1334	1334	5473	1193	946
27.5	677	782	1040	679	908	27.5	1328	1328	5431	1133	986
27.52	693	844	966	710	917	27.52	1313	1313	5360	1133	1019
27.54	699	808	1015	672	930	27.54	1317	1317	5387	1118	941
27.56	734	784	962	651	882	27.56	1343	1343	5414	1137	918
27.58	675	791	999	672	943	27.58	1347	1347	5281	1189	968
27.6	698	783	1011	686	875	27.6	1308	1308	5429	1120	1053
27.62	737	738	981	615	963	27.62	1341	1341	5360	1202	1016
27.64	735	793	961	720	910	27.64	1332	1332	5358	1158	994
27.66	729	749	949	705	942	27.66	1310	1310	5433	1159	967
27.68	685	766	1020	655	877	27.68	1290	1290	5411	1145	1048
27.7	736	756	969	669	893	27.7	1304	1304	5340	1111	1010
27.72	668	808	996	688	901	27.72	1346	1346	5482	1098	955
27.74	703	791	908	634	973	27.74	1300	1300	5351	1137	991
27.76	723	806	934	706	941	27.76	1317	1317	5433	1106	933
27.78	725	774	994	651	902	27.78	1345	1345	5344	1098	1066
27.8	684	738	923	638	899	27.8	1242	1242	5489	1155	951
27.82	689	774	963	676	874	27.82	1335	1335	5445	1112	976
27.84	730	799	936	675	896	27.84	1367	1367	5364	1170	933
27.86	727	787	984	701	961	27.86	1299	1299	5302	1170	991
27.88	728	702	961	685	928	27.88	1277	1277	5384	1126	970
27.9	654	761	1009	676	900	27.9	1330	1330	5326	1122	1046
27.92	704	783	920	686	938	27.92	1287	1287	5305	1175	1017
27.94	689	728	949	630	889	27.94	1267	1267	5366	1107	1033
27.96	697	780	902	710	914	27.96	1259	1259	5462	1159	1028
27.98	698	715	937	658	971	27.98	1286	1286	5331	1129	1049
28	645	726	953	744	932	28	1293	1293	5392	1153	1014
28.02	717	742	935	640	897	28.02	1401	1401	5319	1153	963
28.04	701	748	980	694	902	28.04	1257	1257	5278	1147	1020
28.06	688	722	899	655	875	28.06	1326	1326	5322	1123	939
28.08	726	763	979	706	962	28.08	1360	1360	5291	1104	1002
28.1	706	732	910	668	915	28.1	1254	1254	5415	1162	998
28.12	723	767	917	724	967	28.12	1301	1301	5480	1125	993
28.14	668	733	1013	671	937	28.14	1299	1299	5373	1150	1003
28.16	694	700	975	707	912	28.16	1331	1331	5511	1135	992
28.18	654	771	908	676	959	28.18	1322	1322	5475	1159	1008
28.2	688	741	905	693	938	28.2	1300	1300	5411	1163	1051
28.22	750	723	931	645	901	28.22	1275	1275	5306	1174	994
28.24	689	711	947	729	863	28.24	1332	1332	5379	1141	996
28.26	674	744	916	687	862	28.26	1298	1298	5415	1167	956
28.28	618	762	951	680	929	28.28	1325	1325	5458	1165	1039
28.3	667	767	930	666	951	28.3	1340	1340	5393	1186	1046
28.32	668	683	918	702	884	28.32	1295	1295	5359	1200	1024
28.34	636	718	963	710	938	28.34	1215	1215	5356	1164	1080
28.36	667	728	931	652	980	28.36	1256	1256	5397	1093	1091
28.38	692	704	959	725	946	28.38	1298	1298	5519	1201	1006
28.4	692	751	965	703	949	28.4	1342	1342	5433	1156	1089
28.42	664	694	956	720	947	28.42	1307	1307	5303	1122	1015
28.44	677	717	988	726	930	28.44	1320	1320	5439	1172	1099
28.46	695	751	894	732	957	28.46	1225	1225	5358	1087	1030
28.48	657	676	905	682	947	28.48	1265	1265	5368	1139	1029
28.5	700	746	890	720	938	28.5	1246	1246	5410	1147	1040
28.52	661	709	962	703	980	28.52	1261	1261	5291	1157	1023
28.54	706	702	880	715	911	28.54	1298	1298	5270	1155	1044
28.56	687	728	896	712	909	28.56	1263	1263	5445	1239	1003
28.58	671	726	863	766	962	28.58	1297	1297	5373	1165	1084
28.6	657	784	967	672	929	28.6	1255	1255	5320	1128	1054
28.62	732	747	915	707	968	28.62	1313	1313	5379	1144	1093
28.64	610	760	960	702	987	28.64	1334	1334	5302	1158	1014
28.66	703	697	939	719	1000	28.66	1308	1308	5330	1122	1029
28.68	649	720	939	762	949	28.68	1277	1277	5457	1177	1013
28.7	676	674	943	771	981	28.7	1324	1324	5387	1158	1077
28.72	699	792	911	734	991	28.72	1268	1268	5497	1158	1072
28.74	712	725	976	728	957	28.74	1273	1273	5361	1168	1054
28.76	705	672	920	710	989	28.76	1273	1273	5480	1219	1035
28.78	681	744	942	744	1012	28.78	1222	1222	5445	1163	1067
28.8	695	728	901	702	1004	28.8	1289	1289	5412	1145	1091
28.82	698	724	919	736	974	28.82	1290	1290	5337	1122	1098
28.84	667	711	948	741	991	28.84	1273	1273	5470	1167	1134
28.86	685	751	918	760	1048	28.86	1228	1228	5300	1150	1061
28.88	691	768	961	765	975	28.88	1256	1256	5277	1208	1103
28.9	696	714	911	780	1010	28.9	1264	1264	5232	1230	1062
28.92	666	717	942	820	1038	28.92	1320	1320	5329	1258	1026
28.94	654	724	966	797	998	28.94	1272	1272	5400	1147	1085
28.96	684	632	934	788	983	28.96	1258	1258	5287	1190	1084
28.98	702	701	939	763	1027	28.98	1322	1322	5389	1138	1078
29	645	721	937	808	1057	29	1274	1274	5385	1195	1061
29.02	727	740	944	807	1026	29.02	1289	1289	5284	1211	1095
29.04	716	713	972	863	1024	29.04	1236	1236	5441	1210	1165
29.06	639	714	921	819	1061	29.06	1204	1204	5364	1227	1111
29.08	686	627	894	848	1005	29.08	1260	1260	5384	1140	1093
29.1	686	737	935	841	1068	29.1	1215	1215	5414	1198	1078
29.12	704	719	953	858	1040	29.12	1304	1304	5344	1204	1103
29.14	678	687	917	847	1055	29.14	1298	1298	5412	1189	1134
29.16	654	701	948	872	1063	29.16	1286	1286	5465	1128	1091
29.18	683	694	944	819	1075	29.18	1275	1275	5462	1189	1178
29.2	668	685	960	845	1086	29.2	1279	1279	5446	1212	1102
29.22	678	666	953	896	1095	29.22	1302	1302	5555	1192	1122
29.24	656	695	973	952	1137	29.24	1320	1320	5394	1163	1131
29.26	688	700	933	941	1093	29.26	1291	1291	5483	1228	1137
29.28	689	715	981	888	1156	29.28	1295	1295	5405	1184	1128
29.3	681	686	976	889	1055	29.3	1325	1325	5474	1176	1126
29.32	644	702	1019	993	1135	29.32	1363	1363	5537	1146	1105
29.34	716	665	975	940	1159	29.34	1279	1279	5477	1122	1119
29.36	622	644	1011	948	1150	29.36	1263	1263	5497	1205	1161
29.38	657	716	1006	1038	1162	29.38	1327	1327	5549	1215	1127
29.4	677	728	1025	1093	1195	29.4	1278	1278	5542	1195	1149
29.42	689	689	1028	1082	1235	29.42	1326	1326	5528	1192	1117
29.44	648	635	1062	1098	1208	29.44	1318	1318	5639	1241	1150
29.46	665	739	1052	1087	1195	29.46	1363	1363	5639	1223	1171
29.48	655	685	1066	1136	1238	29.48	1328	1328	5532	1163	1121
29.5	672	691	1025	1173	1277	29.5	1252	1252	5624	1242	1158
29.52	661	670	1081	1246	1316	29.52	1264	1264	5627	1207	1136
29.54	655	677	1070	1304	1326	29.54	1308	1308	5567	1192	1256
29.56	695	660	1169	1347	1339	29.56	1341	1341	5690	1259	1242
29.58	725	772	1166	1441	1377	29.58	1330	1330	5800	1312	1216
29.6	643	723	1154	1466	1352	29.6	1338	1338	5901	1251	1234
29.62	704	680	1171	1604	1440	29.62	1367	1367	5919	1205	1183
29.64	697	649	1225	1672	1473	29.64	1349	1349	5930	1190	1206
29.66	698	707	1243	1938	1462	29.66	1398	1398	5897	1216	1230
29.68	665	710	1247	1995	1524	29.68	1362	1362	6126	1188	1231
29.7	666	672	1277	2221	1595	29.7	1451	1451	6100	1225	1183
29.72	659	654	1250	2328	1716	29.72	1453	1453	6091	1288	1238
29.74	682	727	1373	2668	1761	29.74	1433	1433	6347	1230	1353
29.76	653	705	1407	2976	1764	29.76	1439	1439	6391	1254	1340
29.78	697	678	1387	3324	1928	29.78	1507	1507	6395	1270	1333
29.8	658	610	1421	3703	1912	29.8	1460	1460	6550	1230	1309
29.82	683	672	1478	4190	2009	29.82	1555	1555	6655	1248	1315
29.84	663	705	1456	4790	2172	29.84	1613	1613	6730	1172	1283
29.86	648	689	1390	5220	2190	29.86	1594	1594	6931	1324	1294
29.88	698	689	1408	5597	2236	29.88	1676	1676	6880	1237	1325
29.9	674	722	1491	5999	2313	29.9	1652	1652	7084	1234	1390
29.92	653	618	1424	6406	2335	29.92	1702	1702	7042	1249	1366
29.94	677	702	1506	6805	2349	29.94	1640	1640	7078	1301	1350
29.96	641	686	1339	6925	2325	29.96	1693	1693	7031	1336	1321
29.98	641	679	1374	6854	2373	29.98	1713	1713	6924	1297	1334
30	682	713	1329	6948	2421	30	1834	1834	6966	1249	1421
30.02	661	654	1284	6875	2291	30.02	1766	1766	6919	1327	1383
30.04	701	722	1244	6432	2171	30.04	1715	1715	6880	1367	1357
30.06	677	653	1309	5892	2184	30.06	1727	1727	6738	1295	1393
30.08	656	674	1236	5633	2041	30.08	1758	1758	6721	1290	1438
30.1	678	702	1209	5057	2038	30.1	1645	1645	6741	1302	1464
30.12	688	677	1161	4547	2006	30.12	1641	1641	6529	1365	1433
30.14	669	715	1085	4096	1851	30.14	1742	1742	6408	1375	1313
30.16	672	759	1066	3491	1744	30.16	1633	1633	6267	1353	1435
30.18	685	661	1078	3121	1679	30.18	1634	1634	6282	1341	1417
30.2	710	692	1110	2750	1531	30.2	1510	1510	6267	1317	1409
30.22	603	682	1091	2313	1530	30.22	1496	1496	6114	1361	1421
30.24	702	664	1055	2080	1579	30.24	1416	1416	6195	1283	1443
30.26	675	675	1003	1877	1462	30.26	1431	1431	6041	1342	1487
30.28	698	689	978	1698	1396	30.28	1398	1398	5975	1388	1470
30.3	764	680	985	1556	1397	30.3	1404	1404	5952	1359	1448
30.32	687	665	989	1460	1381	30.32	1452	1452	5835	1380	1498
30.34	712	691	959	1372	1370	30.34	1367	1367	5860	1410	1485
30.36	725	689	981	1258	1354	30.36	1286	1286	5861	1431	1542
30.38	644	673	1022	1213	1344	30.38	1374	1374	5792	1448	1602
30.4	719	689	1038	1213	1282	30.4	1316	1316	5955	1501	1574
30.42	724	678	959	1131	1288	30.42	1347	1347	5860	1498	1630
30.44	715	699	952	1137	1249	30.44	1310	1310	5842	1565	1605
30.46	732	667	994	1065	1201	30.46	1286	1286	5606	1465	1567
30.48	697	680	988	1014	1312	30.48	1290	1290	5527	1459	1727
30.5	782	642	909	949	1219	30.5	1263	1263	5797	1549	1708
30.52	749	695	967	1038	1165	30.52	1274	1274	5685	1614	1673
30.54	719	619	974	985	1259	30.54	1286	1286	5705	1607	1769
30.56	769	678	1037	993	1227	30.56	1219	1219	5666	1529	1709
30.58	742	666	919	905	1215	30.58	1246	1246	5823	1609	1780
30.6	721	671	955	965	1239	30.6	1266	1266	5672	1639	1786
30.62	745	634	924	959	1174	30.62	1286	1286	5682	1621	1852
30.64	787	677	929	863	1227	30.64	1265	1265	5631	1666	1894
30.66	741	706	947	910	1251	30.66	1268	1268	5825	1682	1952
30.68	750	696	945	928	1250	30.68	1304	1304	5705	1763	1920
30.7	715	662	913	866	1239	30.7	1170	1170	5773	1775	1912
30.72	716	644	920	848	1215	30.72	1174	1174	5868	1823	1988
30.74	756	694	960	824	1190	30.74	1254	1254	5925	1796	2009
30.76	730	676	988	782	1200	30.76	1263	1263	5738	1845	2094
30.78	695	666	889	857	1165	30.78	1214	1214	5896	1875	2148
30.8	748	675	869	835	1204	30.8	1270	1270	5873	1954	2142
30.82	742	693	947	875	1154	30.82	1219	1219	5861	2001	2182
30.84	753	699	969	800	1248	30.84	1195	1195	6110	2029	2337
30.86	710	668	885	759	1202	30.86	1261	1261	5899	2106	2362
30.88	742	729	933	823	1205	30.88	1232	1232	6035	2124	2388
30.9	722	650	946	826	1237	30.9	1196	1196	6004	2231	2503
30.92	700	727	927	747	1189	30.92	1223	1223	5860	2312	2538
30.94	668	692	905	794	1265	30.94	1149	1149	6161	2292	2639
30.96	691	640	931	746	1284	30.96	1158	1158	6166	2274	2761
30.98	692	727	962	812	1263	30.98	1190	1190	6139	2558	2890
31	719	727	944	803	1242	31	1141	1141	6222	2544	2933
31.02	709	660	948	758	1271	31.02	1210	1210	6183	2674	3179
31.04	777	682	958	801	1242	31.04	1195	1195	6304	2716	3092
31.06	692	695	933	761	1182	31.06	1182	1182	6347	2678	3183
31.08	731	712	919	745	1285	31.08	1240	1240	6346	2846	3354
31.1	732	654	865	793	1296	31.1	1156	1156	6340	2985	3515
31.12	710	716	890	778	1242	31.12	1155	1155	6581	3093	3593
31.14	697	706	878	779	1284	31.14	1184	1184	6789	3231	3879
31.16	762	666	957	794	1233	31.16	1217	1217	6732	3410	4011
31.18	701	698	993	774	1342	31.18	1165	1165	6856	3496	4179
31.2	719	713	939	723	1263	31.2	1200	1200	7065	3708	4378
31.22	719	660	925	774	1411	31.22	1179	1179	7155	3826	4604
31.24	747	749	950	781	1365	31.24	1145	1145	7407	3914	4826
31.26	727	751	888	767	1359	31.26	1140	1140	7375	4170	5099
31.28	726	791	979	747	1367	31.28	1147	1147	7583	4276	5363
31.3	741	750	905	740	1350	31.3	1100	1100	7665	4423	5620
31.32	690	806	938	742	1367	31.32	1176	1176	7784	4656	5868
31.34	717	827	937	735	1394	31.34	1196	1196	8090	4937	6270
31.36	707	830	909	806	1449	31.36	1152	1152	8309	5198	6473
31.38	715	878	944	757	1411	31.38	1175	1175	8354	5358	6685
31.4	707	988	963	792	1429	31.4	1169	1169	8750	5428	6978
31.42	692	998	945	782	1413	31.42	1129	1129	8918	5653	7442
31.44	707	1102	992	762	1424	31.44	1130	1130	9020	5857	7731
31.46	701	1151	920	759	1526	31.46	1132	1132	9390	6185	8073
31.48	681	1114	957	793	1500	31.48	1157	1157	9485	6414	8475
31.5	659	1183	984	713	1496	31.5	1171	1171	9749	6413	8855
31.52	621	1121	950	758	1460	31.52	1111	1111	10060	6757	9218
31.54	652	1086	961	747	1535	31.54	1123	1123	10313	6942	9524
31.56	690	1109	1033	786	1583	31.56	1125	1125	10402	7098	9896
31.58	674	1044	1050	809	1596	31.58	1124	1124	10496	7458	10147
31.6	654	885	1033	792	1638	31.6	1085	1085	10943	7627	10177
31.62	667	909	1015	853	1638	31.62	1141	1141	11011	7621	10331
31.64	677	829	1082	791	1647	31.64	1135	1135	11144	7884	10657
31.66	659	790	1053	855	1652	31.66	1150	1150	11185	8134	10701
31.68	685	761	1008	844	1624	31.68	1157	1157	11504	8060	11030
31.7	630	775	1047	855	1661	31.7	1115	1115	11487	8181	11026
31.72	685	707	1058	833	1666	31.72	1087	1087	11526	7986	11226
31.74	624	676	1031	847	1644	31.74	1119	1119	11732	8294	11162
31.76	670	761	1072	894	1697	31.76	1097	1097	11623	8421	10994
31.78	662	689	1056	884	1674	31.78	1087	1087	11551	8320	10910
31.8	687	677	1108	932	1729	31.8	1078	1078	11488	8330	10911
31.82	673	701	1042	855	1672	31.82	1158	1158	11514	8253	10468
31.84	660	656	1015	848	1628	31.84	1141	1141	11433	8164	10541
31.86	652	701	1066	911	1693	31.86	1132	1132	11253	7918	10134
31.88	674	697	1006	898	1677	31.88	1098	1098	10918	7628	10133
31.9	660	737	1067	864	1658	31.9	1120	1120	10830	7715	9959
31.92	710	711	1010	845	1615	31.92	1087	1087	10748	7422	9604
31.94	670	656	1036	848	1597	31.94	1124	1124	10466	7283	9163
31.96	704	703	1026	831	1643	31.96	1098	1098	10200	7111	8963
31.98	692	683	985	813	1673	31.98	1067	1067	9958	6886	8622
32	696	706	1011	887	1648	32	1096	1096	9703	6666	8538
32.02	728	734	1080	768	1606	32.02	1113	1113	9489	6632	8217
32.04	755	708	1024	805	1584	32.04	1100	1100	9151	6231	7786
32.06	813	704	1043	887	1570	32.06	1086	1086	8978	6016	7464
32.08	857	658	1021	790	1614	32.08	1059	1059	8773	5686	7094
32.1	880	685	992	806	1521	32.1	1109	1109	8650	5584	6947
32.12	958	723	978	805	1568	32.12	1110	1110	8273	5263	6666
32.14	1032	709	997	752	1616	32.14	1087	1087	7979	5086	6324
32.16	1174	693	1036	786	1472	32.16	1091	1091	7840	4986	6141
32.18	1313	750	994	800	1559	32.18	1126	1126	7636	4699	5875
32.2	1444	719	1026	780	1532	32.2	1109	1109	7609	4481	5598
32.22	1587	656	1001	768	1464	32.22	1090	1090	7240	4339	5329
32.24	1702	700	965	771	1462	32.24	1140	1140	7248	4287	5109
32.26	1929	722	982	704	1480	32.26	1095	1095	7166	4048	4954
32.28	2075	702	985	784	1458	32.28	1082	1082	6835	3779	4564
32.3	2145	698	972	725	1496	32.3	1106	1106	6906	3727	4628
32.32	2337	718	1057	724	1456	32.32	1113	1113	6604	3537	4316
32.34	2282	654	958	754	1477	32.34	1056	1056	6577	3356	4188
32.36	2289	687	1053	769	1501	32.36	1108	1108	6353	3147	4014
32.38	2387	702	1046	713	1460	32.38	1133	1133	6269	3162	3859
32.4	2245	725	1025	754	1454	32.4	1040	1040	6249	2993	3798
32.42	2213	712	1095	781	1448	32.42	1057	1057	6128	2849	3545
32.44	2122	719	1008	749	1422	32.44	1160	1160	6156	2724	3482
32.46	1873	673	1067	748	1429	32.46	1053	1053	5867	2671	3391
32.48	1768	685	1040	769	1372	32.48	1066	1066	5875	2493	3185
32.5	1633	669	1095	746	1417	32.5	1086	1086	5680	2522	3205
32.52	1432	750	1119	699	1350	32.52	1094	1094	5748	2407	3044
32.54	1273	733	1187	758	1352	32.54	1035	1035	5763	2288	2971
32.56	1067	769	1159	707	1434	32.56	1113	1113	5574	2221	2869
32.58	1023	655	1160	779	1394	32.58	1064	1064	5618	2170	2759
32.6	894	723	1230	793	1360	32.6	1031	1031	5559	2121	2707
32.62	801	763	1256	792	1406	32.62	1065	1065	5547	2093	2656
32.64	811	755	1219	793	1446	32.64	1061	1061	5591	2032	2575
32.66	744	688	1254	735	1427	32.66	1061	1061	5476	1983	2498
32.68	679	837	1325	703	1456	32.68	1060	1060	5493	1957	2430
32.7	698	705	1422	747	1409	32.7	1058	1058	5459	1928	2313
32.72	634	790	1398	725	1399	32.72	1077	1077	5366	1881	2356
32.74	593	785	1487	786	1443	32.74	1061	1061	5438	1822	2226
32.76	651	710	1528	719	1428	32.76	1076	1076	5336	1734	2236
32.78	660	815	1503	757	1369	32.78	1127	1127	5317	1768	2193
32.8	643	668	1536	700	1398	32.8	1101	1101	5234	1675	2094
32.82	689	766	1582	777	1362	32.82	1119	1119	5228	1724	2116
32.84	628	751	1620	768	1452	32.84	1061	1061	5153	1612	2116
32.86	630	726	1562	763	1433	32.86	1135	1135	5196	1579	2081
32.88	569	744	1583	733	1444	32.88	1135	1135	5047	1478	1951
32.9	603	822	1648	778	1425	32.9	1142	1142	4872	1543	2089
32.92	576	861	1669	736	1455	32.92	1035	1035	5119	1547	1933
32.94	596	826	1658	765	1434	32.94	1018	1018	5016	1474	1875
32.96	618	884	1682	789	1446	32.96	1112	1112	5116	1542	1854
32.98	609	859	1740	777	1428	32.98	1129	1129	5105	1488	1853
33	644	965	1723	778	1490	33	1075	1075	5100	1530	1899
33.02	639	1042	1638	767	1499	33.02	1050	1050	5042	1435	1844
33.04	615	911	1622	730	1437	33.04	1066	1066	5063	1389	1830
33.06	610	1036	1621	754	1470	33.06	1093	1093	5049	1444	1798
33.08	618	1200	1655	736	1405	33.08	997	997	5027	1409	1816
33.1	576	1279	1621	758	1425	33.1	1068	1068	4926	1400	1775
33.12	591	1481	1535	740	1551	33.12	1044	1044	4787	1335	1780
33.14	585	1639	1547	820	1521	33.14	1057	1057	4969	1373	1763
33.16	607	1796	1600	795	1491	33.16	1017	1017	4833	1407	1722
33.18	591	1934	1600	803	1532	33.18	1035	1035	4887	1288	1700
33.2	582	2058	1516	743	1451	33.2	985	985	4952	1308	1743
33.22	583	2119	1481	794	1500	33.22	1014	1014	4982	1342	1698
33.24	551	2230	1456	752	1482	33.24	1034	1034	4875	1281	1682
33.26	586	2224	1416	781	1521	33.26	1002	1002	4885	1320	1633
33.28	598	2216	1332	790	1501	33.28	1074	1074	4815	1320	1700
33.3	591	2152	1381	795	1570	33.3	1033	1033	4893	1337	1622
33.32	572	1981	1354	783	1571	33.32	1035	1035	4898	1284	1644
33.34	573	1781	1337	764	1521	33.34	1037	1037	4799	1216	1651
33.36	595	1662	1292	826	1562	33.36	1031	1031	4907	1242	1591
33.38	604	1488	1292	836	1526	33.38	1025	1025	4804	1220	1644
33.4	582	1320	1346	819	1562	33.4	1028	1028	4884	1222	1687
33.42	558	1170	1281	803	1601	33.42	1033	1033	4883	1252	1616
33.44	556	1037	1223	867	1583	33.44	1014	1014	4965	1178	1644
33.46	568	972	1219	810	1635	33.46	1040	1040	5031	1268	1627
33.48	564	934	1223	816	1617	33.48	1051	1051	4896	1259	1651
33.5	534	865	1164	819	1650	33.5	1041	1041	4899	1232	1702
33.52	566	812	1202	820	1588	33.52	1008	1008	4896	1191	1585
33.54	591	786	1124	806	1718	33.54	1036	1036	4793	1167	1600
33.56	566	788	1158	810	1701	33.56	1028	1028	4897	1209	1656
33.58	562	768	1171	879	1701	33.58	1017	1017	4861	1298	1543
33.6	527	762	1151	858	1704	33.6	1031	1031	4832	1172	1690
33.62	574	778	1118	839	1763	33.62	1050	1050	4943	1171	1626
33.64	536	674	1089	829	1691	33.64	982	982	4802	1247	1630
33.66	557	769	1049	878	1687	33.66	1035	1035	4857	1185	1687
33.68	527	752	1063	958	1787	33.68	1031	1031	4933	1187	1652
33.7	545	756	1064	920	1737	33.7	1035	1035	4858	1199	1609
33.72	546	770	1049	859	1783	33.72	1001	1001	4964	1218	1671
33.74	564	726	1038	898	1838	33.74	995	995	4952	1187	1739
33.76	567	675	1088	892	1834	33.76	1024	1024	4844	1219	1604
33.78	506	746	1096	925	1763	33.78	1071	1071	4939	1201	1714
33.8	574	709	1015	921	1891	33.8	1025	1025	5012	1250	1710
33.82	539	774	1033	907	1846	33.82	993	993	5002	1176	1715
33.84	557	728	966	934	1849	33.84	1009	1009	4956	1200	1670
33.86	546	711	1044	971	1960	33.86	1023	1023	5013	1216	1647
33.88	534	651	973	959	1927	33.88	1038	1038	5016	1196	1707
33.9	556	691	1033	945	1968	33.9	1014	1014	4965	1183	1735
33.92	580	702	1104	962	2007	33.92	994	994	5058	1246	1736
33.94	590	653	1030	948	1923	33.94	1024	1024	5011	1212	1691
33.96	565	678	1047	1046	1993	33.96	967	967	5027	1208	1763
33.98	540	691	1067	1027	2056	33.98	1049	1049	5200	1267	1677
34	520	725	1014	1018	2122	34	1018	1018	5046	1183	1675
34.02	551	738	1053	1071	2169	34.02	975	975	5088	1222	1834
34.04	570	663	1109	1032	2055	34.04	977	977	5135	1254	1750
34.06	517	681	1096	1049	2139	34.06	1013	1013	5015	1238	1748
34.08	519	680	1091	1113	2187	34.08	968	968	5056	1233	1783
34.1	501	670	1132	1091	2186	34.1	1015	1015	5152	1190	1812
34.12	543	725	1141	1126	2259	34.12	994	994	5174	1174	1825
34.14	505	688	1073	1205	2352	34.14	1017	1017	5113	1234	1727
34.16	559	671	1162	1193	2276	34.16	1003	1003	5120	1266	1750
34.18	516	724	1168	1231	2292	34.18	999	999	5214	1243	1829
34.2	523	746	1208	1306	2375	34.2	1013	1013	5167	1250	1830
34.22	561	672	1235	1342	2319	34.22	1020	1020	5212	1289	1870
34.24	500	657	1240	1379	2378	34.24	960	960	5275	1275	1794
34.26	540	678	1237	1493	2433	34.26	963	963	5281	1299	1851
34.28	485	719	1231	1473	2362	34.28	988	988	5358	1274	1827
34.3	549	692	1244	1570	2478	34.3	983	983	5261	1277	1874
34.32	530	655	1251	1643	2552	34.32	1028	1028	5160	1302	1916
34.34	534	710	1228	1692	2482	34.34	997	997	5202	1309	1927
34.36	551	621	1304	1813	2444	34.36	992	992	5276	1294	1855
34.38	540	706	1220	1833	2445	34.38	974	974	5288	1288	1899
34.4	532	704	1290	1887	2564	34.4	999	999	5521	1334	1860
34.42	560	684	1278	1960	2468	34.42	1057	1057	5406	1231	1854
34.44	521	706	1330	2054	2614	34.44	1071	1071	5402	1269	1963
34.46	570	712	1329	2009	2628	34.46	1031	1031	5314	1269	1910
34.48	504	691	1305	2052	2570	34.48	1084	1084	5298	1300	1997
34.5	481	679	1365	2121	2660	34.5	1011	1011	5500	1226	1938
34.52	505	652	1396	2004	2661	34.52	994	994	5320	1356	2027
34.54	541	674	1363	2036	2674	34.54	1048	1048	5436	1253	2016
34.56	513	692	1433	2084	2711	34.56	1018	1018	5411	1313	1974
34.58	508	670	1409	2074	2683	34.58	1027	1027	5373	1296	1919
34.6	527	719	1406	2104	2762	34.6	986	986	5542	1325	1988
34.62	549	745	1434	2015	2725	34.62	1065	1065	5528	1301	1945
34.64	537	655	1418	1965	2722	34.64	1068	1068	5620	1315	1997
34.66	500	709	1394	2024	2830	34.66	1104	1104	5609	1271	2036
34.68	538	718	1509	1957	2818	34.68	1025	1025	5584	1288	2003
34.7	522	714	1539	2095	2876	34.7	1087	1087	5662	1325	2007
34.72	526	735	1572	2046	2949	34.72	1100	1100	5683	1321	2055
34.74	502	730	1583	2176	2965	34.74	1164	1164	5797	1296	2009
34.76	529	704	1627	2188	2945	34.76	1179	1179	5807	1284	2099
34.78	500	727	1705	2256	2992	34.78	1140	1140	5854	1285	2149
34.8	501	719	1656	2371	3160	34.8	1125	1125	5885	1306	2106
34.82	556	703	1830	2485	3207	34.82	1116	1116	5845	1346	2147
34.84	531	763	2028	2558	3188	34.84	1249	1249	6070	1279	2111
34.86	509	671	1940	2726	3334	34.86	1243	1243	6085	1302	2080
34.88	532	671	2116	2802	3350	34.88	1331	1331	6180	1237	2173
34.9	531	769	2278	3006	3280	34.9	1295	1295	6281	1315	2223
34.92	473	709	2368	3249	3578	34.92	1298	1298	6392	1342	2186
34.94	513	708	2570	3454	3527	34.94	1319	1319	6469	1283	2261
34.96	482	725	2786	3771	3753	34.96	1356	1356	6708	1327	2180
34.98	503	711	2984	3947	3815	34.98	1387	1387	6559	1312	2271
35	508	693	3276	4342	3945	35	1396	1396	7008	1373	2348
35.02	490	668	3461	4604	4138	35.02	1446	1446	7190	1305	2300
35.04	519	715	3772	5120	4230	35.04	1519	1519	7449	1347	2347
35.06	518	699	4154	5682	4286	35.06	1502	1502	7441	1312	2453
35.08	522	763	4458	6183	4516	35.08	1556	1556	7830	1341	2345
35.1	499	646	4774	6823	4635	35.1	1602	1602	7856	1403	2365
35.12	487	721	5142	7396	4817	35.12	1692	1692	8079	1374	2502
35.14	491	670	5302	7987	4943	35.14	1694	1694	8469	1365	2501
35.16	532	696	5712	8815	5010	35.16	1896	1896	8411	1359	2522
35.18	532	723	5981	9477	5198	35.18	1759	1759	8615	1370	2479
35.2	508	769	6106	9842	5320	35.2	1841	1841	8684	1401	2463
35.22	536	703	6253	10417	5269	35.22	1927	1927	9096	1411	2538
35.24	531	771	6272	10953	5386	35.24	1915	1915	9110	1413	2556
35.26	474	686	6267	11248	5315	35.26	1943	1943	9247	1447	2495
35.28	516	756	6254	11465	5487	35.28	2005	2005	9261	1452	2535
35.3	509	735	6188	11701	5321	35.3	1977	1977	9178	1463	2511
35.32	487	662	5923	11705	5337	35.32	1945	1945	9220	1590	2606
35.34	561	711	5930	11581	5257	35.34	2013	2013	9441	1483	2675
35.36	483	718	5456	11250	5134	35.36	1961	1961	9389	1583	2654
35.38	515	707	5187	11211	4976	35.38	2020	2020	9132	1617	2757
35.4	534	707	4831	10439	4717	35.4	2028	2028	8936	1652	2712
35.42	568	725	4512	9998	4699	35.42	1925	1925	8825	1597	2699
35.44	543	755	4114	9401	4408	35.44	1912	1912	8578	1575	2693
35.46	555	701	3726	8730	4219	35.46	1886	1886	8606	1700	2726
35.48	617	731	3428	8018	4173	35.48	1752	1752	8246	1729	2743
35.5	563	763	3199	7293	3896	35.5	1715	1715	8119	1699	2800
35.52	590	744	2851	6594	3784	35.52	1685	1685	7844	1740	2841
35.54	596	800	2574	6004	3652	35.54	1701	1701	7960	1733	2849
35.56	633	769	2247	5433	3554	35.56	1705	1705	7588	1778	2900
35.58	633	816	2102	4965	3294	35.58	1657	1657	7549	1858	2984
35.6	627	789	1935	4399	3173	35.6	1546	1546	7240	1922	3005
35.62	643	765	1825	4026	3054	35.62	1561	1561	7380	1943	3107
35.64	695	826	1644	3699	2891	35.64	1428	1428	7265	1956	3034
35.66	697	862	1606	3370	2947	35.66	1422	1422	7141	1963	3206
35.68	631	888	1523	3060	2864	35.68	1413	1413	6927	2003	3123
35.7	666	846	1388	3007	2871	35.7	1337	1337	6955	2093	3278
35.72	692	917	1346	2779	2815	35.72	1348	1348	6846	2017	3328
35.74	688	949	1302	2602	2701	35.74	1270	1270	6748	2148	3231
35.76	655	979	1242	2403	2623	35.76	1285	1285	6801	2159	3322
35.78	668	1074	1134	2241	2581	35.78	1220	1220	6770	2223	3552
35.8	654	1092	1180	2215	2546	35.8	1138	1138	6787	2182	3485
35.82	600	1228	1204	2144	2598	35.82	1188	1188	6678	2301	3633
35.84	635	1473	1121	2082	2563	35.84	1174	1174	6809	2310	3626
35.86	584	1528	1094	2122	2569	35.86	1136	1136	6819	2322	3647
35.88	593	1731	1085	1952	2517	35.88	1181	1181	6819	2413	3777
35.9	546	1897	1135	1899	2556	35.9	1159	1159	6931	2410	3794
35.92	516	2104	1119	1862	2581	35.92	1101	1101	6744	2474	3853
35.94	509	2223	1130	1895	2471	35.94	1088	1088	6658	2552	3801
35.96	531	2278	1080	1911	2563	35.96	1070	1070	6853	2563	4032
35.98	490	2314	1083	1895	2498	35.98	1129	1129	6942	2737	3893
36	552	2437	1111	1834	2538	36	1103	1103	6904	2641	3966
36.02	519	2282	1119	1882	2495	36.02	1078	1078	6732	2714	3862
36.04	501	2237	1092	1838	2529	36.04	1071	1071	6942	2650	4073
36.06	522	2108	1066	1874	2593	36.06	1004	1004	6817	2708	4152
36.08	501	1959	1086	1865	2608	36.08	1117	1117	6763	2724	4118
36.1	485	1727	1125	1920	2446	36.1	1081	1081	6853	2705	4252
36.12	519	1594	1104	1954	2580	36.12	1018	1018	6918	2789	4246
36.14	530	1442	1101	1956	2508	36.14	1047	1047	6914	2876	4267
36.16	524	1239	1128	1981	2487	36.16	1025	1025	6977	2770	4338
36.18	485	1132	1119	2068	2519	36.18	986	986	6808	2827	4264
36.2	499	1090	1128	2059	2528	36.2	1024	1024	6928	2835	4274
36.22	535	981	1138	2096	2420	36.22	998	998	6733	2833	4210
36.24	501	923	1062	2052	2495	36.24	1028	1028	6572	2769	4211
36.26	509	916	998	2055	2487	36.26	1087	1087	6862	2780	4158
36.28	499	871	1082	2090	2542	36.28	1055	1055	6716	2851	4233
36.3	521	872	1076	2030	2459	36.3	1001	1001	6735	2828	4115
36.32	504	800	1067	1950	2424	36.32	922	922	6666	2843	4188
36.34	506	847	1079	1987	2368	36.34	992	992	6435	2795	4064
36.36	519	751	1049	1962	2436	36.36	995	995	6392	2692	3981
36.38	538	788	995	1997	2380	36.38	992	992	6415	2688	3970
36.4	539	835	1044	1954	2328	36.4	974	974	6216	2723	3937
36.42	541	800	1026	1805	2476	36.42	953	953	6259	2569	3915
36.44	609	754	1006	1754	2242	36.44	972	972	6047	2573	3891
36.46	581	767	970	1724	2375	36.46	991	991	6075	2602	3759
36.48	609	718	994	1668	2307	36.48	934	934	5961	2499	3674
36.5	656	763	949	1535	2333	36.5	894	894	5984	2502	3572
36.52	668	748	948	1545	2231	36.52	940	940	5851	2315	3644
36.54	776	684	962	1477	2247	36.54	918	918	5648	2305	3491
36.56	819	778	927	1427	2152	36.56	888	888	5571	2337	3462
36.58	940	674	876	1456	2119	36.58	879	879	5535	2221	3295
36.6	1008	717	922	1374	2081	36.6	850	850	5534	2275	3354
36.62	1087	740	881	1302	2091	36.62	848	848	5370	2128	3148
36.64	1204	711	869	1355	2102	36.64	862	862	5341	2033	3122
36.66	1388	769	870	1237	1981	36.66	875	875	5069	2059	3101
36.68	1409	718	865	1317	2075	36.68	882	882	5130	2064	2915
36.7	1617	685	800	1272	2009	36.7	845	845	5145	1937	2793
36.72	1709	673	870	1213	1945	36.72	801	801	4991	1833	2725
36.74	1905	680	836	1253	1942	36.74	809	809	4972	1845	2738
36.76	2048	642	792	1207	1886	36.76	859	859	4795	1798	2701
36.78	2200	685	830	1305	1812	36.78	857	857	4853	1723	2676
36.8	2330	684	812	1259	1861	36.8	792	792	4692	1636	2499
36.82	2349	701	767	1278	1795	36.82	809	809	4748	1678	2442
36.84	2577	679	778	1201	1705	36.84	834	834	4627	1597	2400
36.86	2592	672	739	1220	1742	36.86	792	792	4490	1553	2391
36.88	2640	617	801	1226	1716	36.88	791	791	4404	1546	2336
36.9	2659	708	753	1195	1716	36.9	811	811	4301	1541	2259
36.92	2735	723	749	1189	1663	36.92	798	798	4378	1431	2081
36.94	2729	650	698	1141	1628	36.94	758	758	4275	1380	2074
36.96	2619	671	664	1094	1626	36.96	772	772	4204	1356	2061
36.98	2659	652	724	1104	1555	36.98	742	742	4178	1347	2008
37	2484	670	740	1059	1507	37	824	824	4070	1322	1947
37.02	2518	687	745	1009	1490	37.02	756	756	4084	1313	1878
37.04	2486	670	712	940	1443	37.04	777	777	4011	1221	1749
37.06	2497	663	714	930	1511	37.06	736	736	3988	1280	1726
37.08	2369	631	652	904	1419	37.08	772	772	3844	1222	1747
37.1	2563	680	682	809	1351	37.1	711	711	4003	1238	1749
37.12	2394	733	679	861	1410	37.12	716	716	3812	1204	1693
37.14	2405	641	627	834	1346	37.14	751	751	3852	1154	1599
37.16	2323	624	625	780	1350	37.16	746	746	3579	1091	1636
37.18	2292	634	651	773	1362	37.18	738	738	3705	1095	1628
37.2	2317	676	629	719	1274	37.2	676	676	3657	1036	1571
37.22	2299	630	640	678	1270	37.22	775	775	3681	1011	1534
37.24	2233	774	637	689	1230	37.24	712	712	3546	1040	1453
37.26	2252	647	609	677	1192	37.26	700	700	3510	992	1433
37.28	2204	608	608	694	1187	37.28	694	694	3668	1069	1393
37.3	2017	628	634	624	1133	37.3	661	661	3547	964	1466
37.32	1922	640	564	644	1149	37.32	732	732	3542	1049	1359
37.34	1787	675	619	675	1149	37.34	726	726	3412	998	1339
37.36	1729	584	629	619	1172	37.36	671	671	3500	1033	1307
37.38	1558	662	606	609	1105	37.38	679	679	3372	916	1324
37.4	1449	654	545	639	1078	37.4	707	707	3322	992	1304
37.42	1254	674	618	608	1059	37.42	684	684	3375	973	1255
37.44	1121	657	587	587	1101	37.44	667	667	3353	888	1229
37.46	1014	612	599	636	1034	37.46	689	689	3446	875	1226
37.48	977	687	557	614	1086	37.48	677	677	3344	946	1269
37.5	885	656	620	610	1042	37.5	682	682	3397	877	1187
37.52	748	649	600	582	1053	37.52	691	691	3267	878	1270
37.54	664	654	566	594	1027	37.54	648	648	3283	869	1196
37.56	631	662	587	629	1019	37.56	652	652	3229	870	1144
37.58	566	628	568	559	964	37.58	714	714	3178	903	1153
37.6	497	630	559	589	1033	37.6	685	685	3281	847	1138
37.62	510	589	579	584	1010	37.62	627	627	3294	860	1116
37.64	503	727	582	566	969	37.64	661	661	3170	787	1140
37.66	466	650	558	509	946	37.66	618	618	3231	821	1067
37.68	458	694	538	568	903	37.68	643	643	3115	813	1059
37.7	431	571	543	560	959	37.7	675	675	3149	821	1099
37.72	469	679	574	553	941	37.72	638	638	3121	787	1077
37.74	431	633	533	551	961	37.74	661	661	3099	784	1060
37.76	454	670	561	518	917	37.76	673	673	3151	780	1037
37.78	432	624	569	554	875	37.78	644	644	3166	828	1006
37.8	397	665	544	540	916	37.8	669	669	3067	774	1026
37.82	431	634	534	546	931	37.82	657	657	3026	767	997
37.84	447	708	569	511	873	37.84	684	684	3112	803	1007
37.86	424	607	516	466	898	37.86	659	659	3143	716	926
37.88	410	644	544	513	926	37.88	661	661	3156	784	929
37.9	421	626	534	510	867	37.9	672	672	3013	744	958
37.92	436	603	533	484	905	37.92	632	632	3115	726	999
37.94	430	587	569	522	888	37.94	603	603	3035	767	962
37.96	434	634	530	530	880	37.96	638	638	2990	804	954
37.98	421	642	568	506	905	37.98	676	676	2946	708	922
38	410	619	517	521	897	38	659	659	2950	705	932
38.02	446	624	521	495	916	38.02	671	671	3073	773	938
38.04	448	625	539	506	828	38.04	628	628	3019	762	861
38.06	416	654	521	491	852	38.06	670	670	3002	762	941
38.08	447	563	525	518	862	38.08	651	651	2975	688	901
38.1	416	662	489	465	799	38.1	661	661	2978	705	860
38.12	422	641	559	458	852	38.12	611	611	3001	717	882
38.14	393	609	511	478	865	38.14	659	659	2921	765	882
38.16	402	645	496	487	820	38.16	631	631	2914	692	859
38.18	400	615	544	518	820	38.18	628	628	2950	703	883
38.2	448	640	536	469	827	38.2	656	656	2979	689	874
38.22	380	602	538	446	827	38.22	606	606	2959	682	825
38.24	406	652	512	445	817	38.24	628	628	2966	707	947
38.26	414	590	551	464	801	38.26	646	646	2913	707	811
38.28	408	661	523	479	822	38.28	662	662	2858	698	801
38.3	431	604	567	473	782	38.3	647	647	2912	709	858
38.32	397	671	528	507	781	38.32	645	645	2869	733	876
38.34	412	641	489	456	765	38.34	673	673	2840	699	789
38.36	388	608	523	453	787	38.36	662	662	2877	686	874
38.38	385	622	535	458	812	38.38	646	646	2892	734	784
38.4	407	641	480	477	765	38.4	645	645	2872	667	806
38.42	409	586	503	509	792	38.42	614	614	2872	662	823
38.44	415	618	493	499	804	38.44	658	658	2869	651	798
38.46	377	601	542	473	732	38.46	644	644	2823	649	816
38.48	397	603	535	426	812	38.48	640	640	2851	650	792
38.5	399	646	502	491	756	38.5	617	617	2723	664	820
38.52	381	601	513	519	763	38.52	669	669	2691	677	777
38.54	405	637	485	465	754	38.54	624	624	2880	635	761
38.56	407	605	493	434	704	38.56	639	639	2809	650	777
38.58	405	660	518	465	777	38.58	621	621	2890	621	745
38.6	370	628	494	441	752	38.6	618	618	2863	632	841
38.62	390	577	484	457	736	38.62	658	658	2842	675	799
38.64	383	645	511	433	683	38.64	638	638	2798	632	812
38.66	387	633	502	465	769	38.66	602	602	2770	666	776
38.68	392	557	496	444	730	38.68	646	646	2804	662	755
38.7	362	582	517	466	725	38.7	574	574	2826	635	795
38.72	402	584	479	454	736	38.72	606	606	2826	641	769
38.74	406	599	457	457	704	38.74	652	652	2763	650	754
38.76	381	606	498	503	738	38.76	610	610	2715	655	771
38.78	393	620	531	434	675	38.78	630	630	2782	648	724
38.8	367	608	498	471	689	38.8	653	653	2688	667	729
38.82	344	633	505	437	708	38.82	637	637	2767	631	752
38.84	360	592	510	459	731	38.84	620	620	2770	653	719
38.86	359	614	513	441	773	38.86	635	635	2728	611	757
38.88	401	615	487	452	720	38.88	547	547	2719	658	737
38.9	350	581	481	426	737	38.9	617	617	2656	616	743
38.92	371	672	540	465	735	38.92	659	659	2765	632	734
38.94	368	634	537	463	712	38.94	586	586	2709	646	732
38.96	359	575	523	438	718	38.96	647	647	2657	601	681
38.98	361	624	489	453	716	38.98	610	610	2741	624	711
39	398	591	480	451	732	39	649	649	2759	642	684
39.02	356	614	523	466	732	39.02	610	610	2710	605	703
39.04	360	636	506	426	687	39.04	634	634	2667	557	779
39.06	377	625	491	441	729	39.06	644	644	2693	591	731
39.08	385	585	473	439	750	39.08	647	647	2784	659	703
39.1	361	582	463	425	694	39.1	630	630	2729	670	713
39.12	401	601	503	433	687	39.12	596	596	2773	635	694
39.14	389	596	511	439	728	39.14	555	555	2732	563	698
39.16	364	602	494	461	669	39.16	645	645	2732	603	728
39.18	370	577	501	390	717	39.18	631	631	2620	590	705
39.2	343	537	499	426	703	39.2	621	621	2621	619	693
39.22	346	626	503	405	637	39.22	590	590	2641	638	659
39.24	349	616	497	418	643	39.24	601	601	2657	617	721
39.26	350	563	478	411	651	39.26	587	587	2700	615	699
39.28	351	601	484	408	697	39.28	642	642	2623	651	661
39.3	306	625	507	426	667	39.3	616	616	2600	646	683
39.32	359	606	474	417	656	39.32	575	575	2728	577	687
39.34	375	613	502	415	727	39.34	602	602	2710	606	675
39.36	344	555	491	422	703	39.36	566	566	2627	580	693
39.38	360	596	487	438	666	39.38	647	647	2632	607	614
39.4	375	618	481	401	684	39.4	600	600	2640	622	682
39.42	381	578	510	425	653	39.42	619	619	2564	587	681
39.44	371	576	490	413	633	39.44	630	630	2614	602	642
39.46	367	575	519	407	638	39.46	619	619	2636	615	649
39.48	374	583	498	402	655	39.48	635	635	2659	591	705
39.5	378	638	496	415	644	39.5	610	610	2641	573	639
39.52	351	679	468	398	692	39.52	572	572	2560	657	656
39.54	417	561	513	366	655	39.54	611	611	2663	616	660
39.56	381	601	521	420	669	39.56	577	577	2635	634	643
39.58	378	554	516	412	638	39.58	609	609	2709	611	676
39.6	355	616	539	393	673	39.6	624	624	2577	558	634
39.62	348	606	547	428	626	39.62	628	628	2566	590	649
39.64	351	598	541	398	659	39.64	619	619	2565	597	627
39.66	348	589	513	397	677	39.66	609	609	2600	603	697
39.68	375	578	516	425	665	39.68	565	565	2558	556	636
39.7	414	598	535	413	656	39.7	624	624	2683	595	626
39.72	377	593	587	384	606	39.72	610	610	2636	598	645
39.74	375	545	506	400	669	39.74	595	595	2648	539	672
39.76	358	614	527	398	596	39.76	626	626	2557	598	616
39.78	410	579	550	412	622	39.78	574	574	2614	601	586
39.8	380	634	527	382	632	39.8	600	600	2519	568	637
39.82	372	554	543	418	606	39.82	591	591	2627	613	654
39.84	381	619	541	393	659	39.84	631	631	2583	525	648
39.86	365	585	546	394	680	39.86	631	631	2582	538	654
39.88	386	538	549	385	603	39.88	614	614	2573	563	628
39.9	365	626	598	420	641	39.9	626	626	2660	653	611
39.92	370	594	595	407	599	39.92	587	587	2550	574	653
39.94	402	641	561	419	664	39.94	602	602	2634	565	625
39.96	424	564	557	420	603	39.96	627	627	2489	580	603
39.98	438	599	617	429	632	39.98	629	629	2655	559	657
40	450	600	654	392	625	40	624	624	2585	587	593
40.02	490	--	624	413	637	40.02	655	655	2576	561	594
40.04	525	--	652	424	646	40.04	643	643	2520	574	614
40.06	519	--	669	390	617	40.06	603	603	2577	556	644
40.08	549	--	702	387	611	40.08	642	642	2535	556	603
40.1	591	--	674	413	673	40.1	624	624	2621	605	607
40.12	666	--	724	424	625	40.12	645	645	2509	596	604
40.14	633	--	739	395	637	40.14	650	650	2574	578	560
40.16	745	--	695	342	650	40.16	645	645	2588	613	657
40.18	780	--	820	416	621	40.18	648	648	2562	577	629
40.2	809	--	800	415	607	40.2	616	616	2599	566	581
40.22	843	--	791	411	652	40.22	674	674	2628	545	587
40.24	887	--	907	389	568	40.24	633	633	2614	548	633
40.26	906	--	902	430	591	40.26	648	648	2665	586	588
40.28	911	--	936	426	650	40.28	658	658	2639	640	604
40.3	889	--	914	386	602	40.3	622	622	2461	567	620
40.32	966	--	986	443	623	40.32	617	617	2638	542	588
40.34	972	--	979	417	597	40.34	676	676	2629	599	590
40.36	912	--	988	380	595	40.36	672	672	2512	590	572
40.38	903	--	996	398	595	40.38	613	613	2570	588	597
40.4	881	--	1003	417	599	40.4	643	643	2625	564	596
40.42	852	--	1065	435	642	40.42	695	695	2592	568	578
40.44	818	--	1031	406	598	40.44	657	657	2561	606	568
40.46	781	--	1006	433	619	40.46	643	643	2637	580	590
40.48	740	--	1021	439	579	40.48	625	625	2592	570	604
40.5	683	--	1002	403	581	40.5	654	654	2523	602	591
40.52	686	--	987	396	572	40.52	647	647	2603	567	603
40.54	609	--	935	411	583	40.54	647	647	2529	573	618
40.56	572	--	985	426	596	40.56	638	638	2569	572	623
40.58	546	--	914	422	589	40.58	614	614	2590	567	593
40.6	538	--	931	444	589	40.6	659	659	2632	548	623
40.62	504	--	954	412	577	40.62	634	634	2641	547	548
40.64	461	--	849	400	571	40.64	611	611	2502	540	556
40.66	446	--	817	404	615	40.66	613	613	2496	586	606
40.68	433	--	857	408	608	40.68	607	607	2564	603	595
40.7	450	--	777	426	591	40.7	624	624	2540	539	575
40.72	408	--	741	429	596	40.72	625	625	2535	543	627
40.74	435	--	768	389	587	40.74	623	623	2547	564	610
40.76	393	--	728	421	546	40.76	615	615	2603	578	541
40.78	378	--	727	403	580	40.78	637	637	2604	560	598
40.8	366	--	700	407	573	40.8	617	617	2600	595	549
40.82	393	--	705	398	574	40.82	630	630	2543	577	562
40.84	384	--	655	405	613	40.84	581	581	2533	567	593
40.86	372	--	646	422	597	40.86	617	617	2587	544	550
40.88	371	--	576	392	580	40.88	583	583	2561	541	582
40.9	383	--	571	419	590	40.9	577	577	2572	528	579
40.92	411	--	565	428	606	40.92	661	661	2623	537	547
40.94	431	--	595	381	578	40.94	615	615	2604	563	560
40.96	380	--	582	405	574	40.96	582	582	2560	594	587
40.98	375	--	557	389	574	40.98	623	623	2574	546	635
41	370	--	524	426	588	41	589	589	2553	577	606
41.02	389	--	547	408	546	41.02	693	693	2556	583	602
41.04	396	--	529	425	602	41.04	646	646	2515	526	568
41.06	390	--	540	423	607	41.06	636	636	2532	574	553
41.08	396	--	517	377	562	41.08	616	616	2527	561	571
41.1	402	--	515	393	583	41.1	581	581	2490	532	557
41.12	354	--	518	419	638	41.12	638	638	2573	536	558
41.14	385	--	474	407	583	41.14	582	582	2437	580	577
41.16	391	--	515	386	546	41.16	595	595	2618	579	593
41.18	397	--	542	394	533	41.18	610	610	2589	582	593
41.2	411	--	506	392	615	41.2	631	631	2576	539	569
41.22	376	--	529	415	546	41.22	578	578	2480	574	583
41.24	402	--	520	434	575	41.24	610	610	2615	560	517
41.26	409	--	517	421	577	41.26	575	575	2603	512	589
41.28	399	--	511	409	607	41.28	541	541	2572	537	562
41.3	416	--	497	423	624	41.3	587	587	2587	518	598
41.32	396	--	538	428	579	41.32	633	633	2648	521	553
41.34	433	--	483	409	606	41.34	650	650	2494	531	562
41.36	416	--	518	416	557	41.36	611	611	2577	548	568
41.38	396	--	525	398	616	41.38	578	578	2562	576	595
41.4	379	--	482	422	557	41.4	604	604	2572	593	563
41.42	397	--	528	372	561	41.42	613	613	2599	527	573
41.44	406	--	532	412	604	41.44	586	586	2574	563	553
41.46	406	--	543	431	584	41.46	591	591	2649	567	533
41.48	392	--	465	444	550	41.48	610	610	2526	539	507
41.5	421	--	503	427	567	41.5	622	622	2565	579	596
41.52	373	--	512	421	632	41.52	607	607	2478	535	557
41.54	377	--	536	452	575	41.54	619	619	2568	521	563
41.56	354	--	487	401	616	41.56	627	627	2569	534	551
41.58	413	--	499	448	559	41.58	591	591	2586	569	575
41.6	375	--	518	395	570	41.6	652	652	2492	567	578
41.62	367	--	515	439	596	41.62	621	621	2521	561	548
41.64	378	--	516	441	602	41.64	602	602	2576	542	550
41.66	380	--	550	413	583	41.66	601	601	2605	537	544
41.68	360	--	529	425	596	41.68	566	566	2420	517	559
41.7	336	--	504	433	592	41.7	609	609	2606	544	584
41.72	353	--	507	425	566	41.72	618	618	2581	546	602
41.74	314	--	518	430	594	41.74	606	606	2557	587	589
41.76	341	--	483	442	604	41.76	563	563	2495	531	542
41.78	340	--	501	424	588	41.78	616	616	2594	519	548
41.8	325	--	525	447	562	41.8	618	618	2492	574	532
41.82	370	--	496	431	587	41.82	574	574	2529	535	560
41.84	373	--	494	434	622	41.84	626	626	2678	520	568
41.86	344	--	515	445	611	41.86	629	629	2605	559	549
41.88	357	--	507	428	567	41.88	615	615	2585	575	570
41.9	366	--	539	458	615	41.9	602	602	2706	561	555
41.92	353	--	491	437	582	41.92	616	616	2534	537	578
41.94	346	--	497	428	630	41.94	605	605	2604	543	530
41.96	347	--	483	428	579	41.96	598	598	2536	567	566
41.98	366	--	459	474	592	41.98	627	627	2618	553	570
42	359	--	490	493	606	42	648	648	2562	564	550
42.02	349	--	508	484	639	42.02	616	616	2496	554	612
42.04	313	--	489	469	571	42.04	596	596	2623	542	627
42.06	322	--	509	468	648	42.06	600	600	2608	553	517
42.08	327	--	512	449	650	42.08	639	639	2622	562	550
42.1	338	--	500	510	650	42.1	632	632	2590	512	534
42.12	335	--	533	456	622	42.12	615	615	2635	561	560
42.14	370	--	504	512	592	42.14	626	626	2591	539	572
42.16	348	--	529	484	674	42.16	621	621	2581	553	563
42.18	351	--	505	530	652	42.18	579	579	2600	557	562
42.2	328	--	544	498	652	42.2	606	606	2566	512	591
42.22	324	--	522	510	700	42.22	650	650	2587	515	548
42.24	377	--	531	493	622	42.24	646	646	2554	535	568
42.26	358	--	506	589	707	42.26	608	608	2604	535	563
42.28	329	--	558	564	663	42.28	580	580	2642	526	583
42.3	330	--	512	515	656	42.3	619	619	2620	512	552
42.32	321	--	551	551	724	42.32	622	622	2618	531	555
42.34	352	--	549	573	703	42.34	646	646	2589	532	563
42.36	334	--	570	587	720	42.36	656	656	2687	524	570
42.38	337	--	531	581	736	42.38	634	634	2655	560	551
42.4	339	--	589	609	713	42.4	633	633	2668	548	537
42.42	351	--	572	610	798	42.42	616	616	2699	557	532
42.44	358	--	593	660	734	42.44	686	686	2715	537	589
42.46	364	--	649	687	803	42.46	600	600	2694	550	555
42.48	350	--	635	713	807	42.48	634	634	2714	532	582
42.5	340	--	659	735	796	42.5	625	625	2738	527	583
42.52	364	--	661	760	809	42.52	615	615	2721	522	601
42.54	340	--	644	782	832	42.54	631	631	2790	555	563
42.56	340	--	626	843	833	42.56	671	671	2676	564	570
42.58	303	--	685	845	877	42.58	662	662	2749	541	578
42.6	321	--	674	900	871	42.6	661	661	2866	572	557
42.62	352	--	676	918	912	42.62	651	651	2929	522	591
42.64	324	--	677	1043	894	42.64	676	676	2890	537	548
42.66	328	--	742	1140	945	42.66	681	681	2882	571	585
42.68	323	--	691	1112	947	42.68	712	712	2838	540	572
42.7	364	--	714	1184	993	42.7	689	689	2888	544	611
42.72	365	--	687	1153	1042	42.72	686	686	2893	507	632
42.74	334	--	727	1218	993	42.74	693	693	2949	531	601
42.76	372	--	783	1327	1040	42.76	673	673	3118	558	548
42.78	355	--	772	1328	1007	42.78	666	666	2913	553	610
42.8	334	--	786	1430	1013	42.8	674	674	2996	555	592
42.82	367	--	765	1370	1038	42.82	708	708	2977	526	595
42.84	323	--	729	1452	1056	42.84	682	682	2967	554	576
42.86	321	--	756	1524	1040	42.86	726	726	2953	554	616
42.88	338	--	717	1539	1050	42.88	682	682	3016	497	585
42.9	357	--	701	1681	1050	42.9	670	670	3033	510	634
42.92	345	--	692	1636	1028	42.92	692	692	3047	514	599
42.94	362	--	677	1601	984	42.94	678	678	3107	593	596
42.96	344	--	672	1543	967	42.96	698	698	2947	537	574
42.98	333	--	629	1613	953	42.98	679	679	2992	547	616
43	342	--	657	1486	1001	43	707	707	3009	534	521
43.02	342	--	622	1467	947	43.02	722	722	2937	556	577
43.04	362	--	559	1458	928	43.04	641	641	3074	537	547
43.06	357	--	618	1402	932	43.06	655	655	3084	560	603
43.08	295	--	610	1361	921	43.08	654	654	2955	521	570
43.1	336	--	575	1319	893	43.1	669	669	2929	553	541
43.12	346	--	572	1250	813	43.12	681	681	2925	521	562
43.14	338	--	567	1234	826	43.14	664	664	2898	558	530
43.16	343	--	554	1142	814	43.16	625	625	2939	527	553
43.18	371	--	564	1071	805	43.18	690	690	2813	543	535
43.2	356	--	539	964	848	43.2	611	611	2807	477	554
43.22	371	--	519	926	792	43.22	655	655	2806	534	549
43.24	324	--	520	900	668	43.24	637	637	2801	552	543
43.26	360	--	531	875	746	43.26	650	650	2776	515	563
43.28	329	--	496	811	709	43.28	632	632	2765	570	542
43.3	323	--	514	773	683	43.3	651	651	2731	527	534
43.32	331	--	528	766	637	43.32	655	655	2761	532	554
43.34	324	--	512	672	716	43.34	628	628	2748	520	496
43.36	333	--	511	695	617	43.36	618	618	2712	525	522
43.38	359	--	443	643	668	43.38	611	611	2743	544	547
43.4	366	--	503	652	606	43.4	661	661	2659	540	572
43.42	366	--	555	589	625	43.42	602	602	2723	549	527
43.44	316	--	481	624	605	43.44	586	586	2765	515	498
43.46	343	--	487	595	622	43.46	638	638	2660	500	535
43.48	340	--	485	547	627	43.48	609	609	2718	551	542
43.5	329	--	493	526	602	43.5	565	565	2562	533	514
43.52	362	--	525	500	604	43.52	600	600	2655	532	508
43.54	346	--	469	510	594	43.54	589	589	2566	526	485
43.56	374	--	519	490	599	43.56	604	604	2540	540	519
43.58	336	--	497	481	588	43.58	600	600	2596	514	545
43.6	356	--	495	463	545	43.6	632	632	2611	492	543
43.62	357	--	508	486	604	43.62	624	624	2619	508	509
43.64	327	--	454	476	569	43.64	614	614	2568	549	531
43.66	292	--	478	483	581	43.66	593	593	2535	501	551
43.68	365	--	470	447	564	43.68	604	604	2564	547	513
43.7	343	--	434	402	549	43.7	544	544	2535	542	545
43.72	344	--	461	448	572	43.72	619	619	2551	548	528
43.74	363	--	479	431	553	43.74	549	549	2598	552	519
43.76	361	--	472	428	560	43.76	616	616	2609	529	570
43.78	355	--	462	431	551	43.78	574	574	2548	537	526
43.8	357	--	457	452	573	43.8	632	632	2571	547	548
43.82	326	--	482	412	577	43.82	585	585	2593	521	530
43.84	376	--	434	435	551	43.84	578	578	2579	557	502
43.86	356	--	454	428	554	43.86	590	590	2546	499	528
43.88	379	--	478	426	553	43.88	577	577	2552	499	511
43.9	344	--	499	415	545	43.9	575	575	2506	527	540
43.92	342	--	456	393	555	43.92	597	597	2562	553	521
43.94	374	--	478	408	576	43.94	601	601	2517	552	509
43.96	378	--	496	393	589	43.96	558	558	2544	539	536
43.98	353	--	453	354	551	43.98	598	598	2494	555	486
44	342	--	463	413	542	44	587	587	2505	564	511
44.02	321	--	439	406	546	44.02	585	585	2541	556	530
44.04	359	--	466	409	552	44.04	603	603	2525	522	549
44.06	363	--	432	399	492	44.06	564	564	2519	524	551
44.08	341	--	487	432	498	44.08	621	621	2542	560	499
44.1	352	--	421	379	537	44.1	644	644	2532	557	516
44.12	382	--	471	429	575	44.12	627	627	2439	571	493
44.14	354	--	482	388	547	44.14	638	638	2468	537	527
44.16	362	--	464	356	568	44.16	555	555	2545	528	533
44.18	351	--	466	377	546	44.18	622	622	2492	543	507
44.2	376	--	479	418	569	44.2	606	606	2446	478	534
44.22	355	--	449	381	529	44.22	544	544	2498	521	536
44.24	397	--	425	402	516	44.24	587	587	2533	543	496
44.26	342	--	449	381	554	44.26	591	591	2439	460	492
44.28	362	--	498	354	543	44.28	561	561	2470	518	547
44.3	374	--	438	376	533	44.3	621	621	2474	470	496
44.32	384	--	452	360	550	44.32	587	587	2422	516	497
44.34	337	--	431	369	524	44.34	561	561	2480	548	501
44.36	337	--	443	390	535	44.36	561	561	2490	572	496
44.38	321	--	454	407	496	44.38	586	586	2532	552	515
44.4	380	--	476	384	490	44.4	612	612	2468	522	479
44.42	383	--	439	358	486	44.42	602	602	2508	492	493
44.44	357	--	454	409	541	44.44	612	612	2482	541	507
44.46	348	--	436	361	531	44.46	599	599	2535	511	499
44.48	368	--	434	365	528	44.48	527	527	2499	481	524
44.5	324	--	411	388	526	44.5	586	586	2591	545	516
44.52	375	--	445	385	507	44.52	607	607	2494	540	485
44.54	361	--	457	388	533	44.54	584	584	2399	499	499
44.56	343	--	441	355	506	44.56	566	566	2487	500	513
44.58	371	--	449	364	518	44.58	564	564	2404	563	494
44.6	385	--	478	391	562	44.6	568	568	2447	498	517
44.62	341	--	444	370	510	44.62	605	605	2477	540	516
44.64	340	--	447	353	533	44.64	563	563	2473	509	471
44.66	373	--	420	367	509	44.66	594	594	2481	510	528
44.68	351	--	438	356	483	44.68	571	571	2410	517	519
44.7	359	--	422	362	515	44.7	580	580	2514	523	518
44.72	348	--	418	362	512	44.72	573	573	2475	541	499
44.74	349	--	452	389	546	44.74	553	553	2358	527	508
44.76	317	--	455	337	509	44.76	568	568	2400	549	496
44.78	343	--	465	358	538	44.78	594	594	2442	523	500
44.8	344	--	412	346	519	44.8	506	506	2379	552	491
44.82	360	--	432	344	559	44.82	585	585	2473	490	480
44.84	358	--	436	369	537	44.84	604	604	2468	490	517
44.86	382	--	401	380	528	44.86	561	561	2409	508	485
44.88	326	--	415	323	547	44.88	589	589	2345	503	541
44.9	373	--	433	365	502	44.9	568	568	2415	460	476
44.92	365	--	423	370	469	44.92	560	560	2415	473	499
44.94	352	--	459	360	504	44.94	600	600	2366	519	492
44.96	360	--	467	348	519	44.96	591	591	2493	484	496
44.98	354	--	485	345	532	44.98	525	525	2542	503	524
45	368	--	478	320	495	45	581	581	2330	546	513
45.02	360	--	434	331	531	45.02	527	527	2421	514	529
45.04	361		439	349	522	45.04	600	600	2401	512	477
45.06	353		465	350	489	45.06	566	566	2377	508	518
45.08	365		448	337	530	45.08	590	590	2372	507	517
45.1	335		450	374	502	45.1	557	557	2439	492	476
45.12	370		474	325	521	45.12	569	569	2364	527	483
45.14	348		461	330	560	45.14	573	573	2393	491	507
45.16	360		431	378	544	45.16	614	614	2400	529	485
45.18	361		423	331	527	45.18	566	566	2414	524	502
45.2	338		474	361	522	45.2	553	553	2323	514	484
45.22	336		425	336	510	45.22	576	576	2539	510	527
45.24	373		422	356	530	45.24	587	587	2435	523	514
45.26	341		445	412	533	45.26	509	509	2398	482	473
45.28	393		454	352	549	45.28	575	575	2398	564	540
45.3	329		411	347	504	45.3	608	608	2468	499	501
45.32	341		452	365	530	45.32	545	545	2327	533	505
45.34	371		460	363	548	45.34	580	580	2280	523	495
45.36	393		467	347	550	45.36	538	538	2355	476	510
45.38	402		452	365	505	45.38	590	590	2402	495	481
45.4	405		452	376	551	45.4	584	584	2381	489	528
45.42	357		442	345	534	45.42	573	573	2381	530	522
45.44	423		419	363	505	45.44	559	559	2317	510	535
45.46	429		436	370	487	45.46	551	551	2398	502	530
45.48	392		418	379	545	45.48	571	571	2409	513	496
45.5	419		451	361	526	45.5	619	619	2420	519	516
45.52	463		434	326	497	45.52	583	583	2358	512	509
45.54	415		423	310	508	45.54	563	563	2324	484	503
45.56	489		464	332	518	45.56	565	565	2416	501	480
45.58	466		455	355	541	45.58	587	587	2314	486	520
45.6	479		431	379	480	45.6	621	621	2395	472	527
45.62	508		432	343	484	45.62	579	579	2454	525	506
45.64	519		442	338	546	45.64	563	563	2412	516	542
45.66	531		487	348	530	45.66	568	568	2331	538	504
45.68	472		406	340	546	45.68	557	557	2373	467	523
45.7	555		420	325	504	45.7	543	543	2430	517	510
45.72	540		399	345	499	45.72	569	569	2367	499	520
45.74	563		443	367	499	45.74	600	600	2481	475	535
45.76	556		420	358	531	45.76	553	553	2366	534	554
45.78	576		437	357	512	45.78	584	584	2373	511	538
45.8	618		439	313	537	45.8	550	550	2313	485	559
45.82	555		456	360	551	45.82	592	592	2373	496	511
45.84	561		433	355	522	45.84	553	553	2389	503	492
45.86	602		400	356	542	45.86	586	586	2439	532	535
45.88	583		427	335	517	45.88	567	567	2363	510	486
45.9	553		440	312	526	45.9	560	560	2325	497	522
45.92	505		432	384	525	45.92	566	566	2351	517	503
45.94	519		448	359	500	45.94	606	606	2304	474	514
45.96	489		431	335	513	45.96	568	568	2355	519	570
45.98	502		454	346	514	45.98	573	573	2407	517	547
46	497		462	343	492	46	592	592	2351	532	512
46.02	483		413	353	546	46.02	565	565	2455	507	509
46.04	466		413	338	541	46.04	583	583	2357	516	501
46.06	437		449	332	505	46.06	586	586	2318	510	534
46.08	414		413	350	521	46.08	568	568	2351	525	493
46.1	459		451	334	528	46.1	592	592	2267	516	558
46.12	385		428	359	530	46.12	561	561	2419	491	547
46.14	357		428	363	522	46.14	531	531	2337	504	549
46.16	376		432	344	513	46.16	553	553	2354	488	505
46.18	385		429	349	491	46.18	568	568	2321	502	531
46.2	353		476	346	562	46.2	580	580	2425	504	524
46.22	361		448	347	544	46.22	554	554	2289	520	587
46.24	347		484	346	550	46.24	572	572	2380	522	520
46.26	345		422	362	509	46.26	538	538	2330	490	491
46.28	355		419	340	527	46.28	552	552	2309	505	541
46.3	339		444	336	551	46.3	571	571	2362	486	560
46.32	337		453	329	534	46.32	583	583	2347	517	550
46.34	371		410	346	535	46.34	549	549	2322	537	538
46.36	342		424	362	530	46.36	526	526	2314	535	521
46.38	334		433	357	523	46.38	546	546	2324	548	538
46.4	345		408	367	554	46.4	590	590	2348	506	539
46.42	341		469	358	544	46.42	533	533	2352	548	585
46.44	345		415	357	542	46.44	556	556	2484	538	507
46.46	359		421	370	576	46.46	581	581	2381	508	538
46.48	330		432	358	573	46.48	567	567	2365	516	537
46.5	342		429	358	508	46.5	565	565	2360	531	534
46.52	335		466	364	545	46.52	519	519	2283	497	568
46.54	324		440	359	537	46.54	538	538	2314	500	530
46.56	328		428	344	576	46.56	528	528	2375	521	544
46.58	318		423	361	522	46.58	560	560	2372	499	603
46.6	343		430	351	546	46.6	548	548	2329	513	608
46.62	342		413	367	585	46.62	602	602	2403	528	574
46.64	339		428	338	575	46.64	582	582	2493	559	554
46.66	327		423	373	558	46.66	555	555	2385	509	574
46.68	333		444	356	557	46.68	552	552	2405	539	583
46.7	330		415	324	559	46.7	490	490	2341	550	552
46.72	356		427	392	570	46.72	575	575	2374	574	578
46.74	324		433	387	552	46.74	565	565	2264	559	612
46.76	316		458	361	573	46.76	523	523	2341	517	576
46.78	337		433	357	567	46.78	547	547	2410	536	584
46.8	323		458	366	572	46.8	540	540	2362	543	648
46.82	314		414	359	594	46.82	558	558	2358	549	613
46.84	341		455	417	618	46.84	568	568	2365	513	571
46.86	332		463	367	579	46.86	584	584	2382	523	592
46.88	342		437	398	570	46.88	570	570	2423	518	610
46.9	313		420	413	598	46.9	559	559	2318	586	595
46.92	329		452	415	590	46.92	492	492	2413	522	632
46.94	321		466	374	601	46.94	546	546	2389	578	614
46.96	339		468	409	614	46.96	554	554	2432	590	610
46.98	334		447	380	583	46.98	574	574	2379	594	649
47	321		447	417	615	47	553	553	2414	536	611
47.02	330		467	418	661	47.02	564	564	2387	538	631
47.04	327		471	457	627	47.04	570	570	2345	533	591
47.06	325		432	428	635	47.06	540	540	2387	562	590
47.08	315		443	419	637	47.08	522	522	2412	586	638
47.1	313		470	415	673	47.1	538	538	2417	561	628
47.12	295		477	443	684	47.12	551	551	2397	537	628
47.14	323		474	400	675	47.14	542	542	2399	546	641
47.16	334		464	425	583	47.16	541	541	2460	576	681
47.18	332		454	437	643	47.18	525	525	2438	573	666
47.2	327		472	481	647	47.2	501	501	2449	568	668
47.22	329		501	449	615	47.22	561	561	2360	592	626
47.24	341		470	440	641	47.24	543	543	2457	546	610
47.26	340		468	439	687	47.26	518	518	2508	536	679
47.28	339		442	454	642	47.28	525	525	2471	548	625
47.3	334		466	480	693	47.3	523	523	2402	568	671
47.32	305		471	505	716	47.32	554	554	2487	566	701
47.34	326		477	448	652	47.34	519	519	2397	513	660
47.36	351		478	489	701	47.36	578	578	2494	602	676
47.38	337		497	471	679	47.38	531	531	2558	609	703
47.4	353		472	499	712	47.4	526	526	2486	598	694
47.42	322		447	501	691	47.42	543	543	2434	590	641
47.44	346		475	540	743	47.44	550	550	2550	577	664
47.46	334		526	545	705	47.46	480	480	2520	582	700
47.48	361		479	501	690	47.48	520	520	2459	602	711
47.5	350		478	550	700	47.5	560	560	2477	593	669
47.52	337		532	589	709	47.52	537	537	2524	603	728
47.54	337		504	522	659	47.54	522	522	2452	576	716
47.56	351		451	510	678	47.56	528	528	2521	658	692
47.58	363		478	604	686	47.58	514	514	2499	576	684
47.6	364		448	601	699	47.6	581	581	2415	580	687
47.62	340		517	557	735	47.62	537	537	2535	621	672
47.64	345		494	584	718	47.64	547	547	2513	617	716
47.66	322		509	534	697	47.66	540	540	2431	594	680
47.68	340		495	498	666	47.68	499	499	2469	585	730
47.7	343		509	578	702	47.7	511	511	2516	588	739
47.72	309		499	568	652	47.72	513	513	2589	619	710
47.74	291		513	541	681	47.74	554	554	2465	598	677
47.76	306		465	504	683	47.76	576	576	2534	584	690
47.78	367		467	483	676	47.78	533	533	2515	560	721
47.8	356		466	499	655	47.8	526	526	2507	532	767
47.82	370		490	506	703	47.82	555	555	2482	566	720
47.84	352		521	476	674	47.84	557	557	2414	567	721
47.86	300		473	440	622	47.86	503	503	2435	589	724
47.88	367		499	444	692	47.88	566	566	2436	577	707
47.9	368		475	464	651	47.9	551	551	2426	641	706
47.92	348		485	449	638	47.92	529	529	2412	611	694
47.94	382		467	435	679	47.94	538	538	2409	578	668
47.96	377		501	428	697	47.96	524	524	2450	590	678
47.98	351		480	428	685	47.98	525	525	2454	569	710
48	312		439	421	655	48	562	562	2462	550	705
48.02	354		467	400	654	48.02	535	535	2427	552	671
48.04	368		513	417	682	48.04	526	526	2422	535	695
48.06	355		472	400	622	48.06	537	537	2396	569	667
48.08	381		464	388	623	48.08	527	527	2432	512	649
48.1	345		480	393	613	48.1	533	533	2384	549	642
48.12	369		471	385	637	48.12	496	496	2454	570	655
48.14	335		481	403	677	48.14	532	532	2361	551	655
48.16	346		461	370	635	48.16	506	506	2367	541	668
48.18	364		514	381	622	48.18	507	507	2404	573	670
48.2	394		484	382	593	48.2	526	526	2436	572	657
48.22	412		472	400	571	48.22	501	501	2417	549	683
48.24	366		463	382	577	48.24	524	524	2293	542	625
48.26	368		487	382	612	48.26	542	542	2350	543	673
48.28	387		503	370	597	48.28	544	544	2410	564	638
48.3	366		510	366	591	48.3	532	532	2351	588	607
48.32	394		505	355	588	48.32	528	528	2381	545	627
48.34	363		532	373	583	48.34	535	535	2277	542	605
48.36	405		467	400	549	48.36	524	524	2326	541	596
48.38	430		506	373	606	48.38	479	479	2390	503	623
48.4	379		527	362	605	48.4	489	489	2275	556	577
48.42	388		548	355	589	48.42	557	557	2296	534	609
48.44	364		504	358	552	48.44	522	522	2356	529	628
48.46	399		552	358	522	48.46	561	561	2264	545	597
48.48	412		535	353	576	48.48	521	521	2300	522	559
48.5	410		585	333	544	48.5	552	552	2377	534	553
48.52	411		546	389	602	48.52	552	552	2328	533	563
48.54	447		596	339	563	48.54	545	545	2338	534	589
48.56	476		597	340	565	48.56	536	536	2338	524	575
48.58	464		587	351	538	48.58	525	525	2263	544	552
48.6	492		605	370	526	48.6	505	505	2320	528	545
48.62	486		648	320	540	48.62	530	530	2372	471	568
48.64	503		645	344	530	48.64	564	564	2270	526	590
48.66	559		616	314	558	48.66	485	485	2256	523	560
48.68	614		681	357	553	48.68	565	565	2275	528	540
48.7	694		659	371	524	48.7	534	534	2251	480	532
48.72	689		753	401	569	48.72	520	520	2333	475	519
48.74	714		688	354	560	48.74	503	503	2228	496	549
48.76	849		751	335	510	48.76	557	557	2346	483	511
48.78	976		769	330	543	48.78	529	529	2185	520	558
48.8	1070		760	338	527	48.8	514	514	2240	552	509
48.82	1251		795	359	500	48.82	542	542	2230	513	534
48.84	1410		835	322	478	48.84	524	524	2208	463	523
48.86	1542		831	325	504	48.86	517	517	2218	498	509
48.88	1725		875	377	499	48.88	533	533	2195	494	540
48.9	1983		854	367	524	48.9	542	542	2173	467	535
48.92	2079		940	364	518	48.92	555	555	2220	490	525
48.94	2305		960	340	516	48.94	518	518	2269	492	533
48.96	2490		984	381	495	48.96	527	527	2199	474	556
48.98	2836		1022	358	500	48.98	524	524	2229	495	538
49	3093		1003	339	475	49	580	580	2269	513	486
49.02	3146		991	333	465	49.02	493	493	2257	523	591
49.04	3248		1010	359	500	49.04	539	539	2176	509	518
49.06	3325		1099	364	501	49.06	569	569	2193	493	517
49.08	3658		1084	364	495	49.08	559	559	2229	472	510
49.1	3599		1081	330	503	49.1	542	542	2237	473	483
49.12	3807		1081	355	484	49.12	489	489	2267	449	518
49.14	3742		1052	348	476	49.14	536	536	2178	446	505
49.16	3715		1051	347	482	49.16	544	544	2201	506	499
49.18	3647		1007	361	494	49.18	542	542	2182	427	520
49.2	3526		1070	324	474	49.2	498	498	2232	501	547
49.22	3359		973	338	499	49.22	563	563	2141	476	515
49.24	3321		989	361	468	49.24	481	481	2131	495	503
49.26	3052		966	364	479	49.26	562	562	2241	482	497
49.28	2915		955	393	489	49.28	551	551	2198	496	469
49.3	2742		911	333	496	49.3	558	558	2166	461	509
49.32	2404		988	373	468	49.32	554	554	2160	496	459
49.34	2224		921	325	464	49.34	555	555	2286	455	485
49.36	1945		849	324	432	49.36	524	524	2272	462	484
49.38	1653		851	368	439	49.38	566	566	2257	455	489
49.4	1504		869	337	474	49.4	529	529	2175	509	438
49.42	1292		818	343	511	49.42	482	482	2200	478	480
49.44	1102		791	346	491	49.44	515	515	2136	466	483
49.46	953		761	334	468	49.46	531	531	2165	483	482
49.48	817		742	319	445	49.48	527	527	2196	483	527
49.5	742		726	360	467	49.5	542	542	2109	487	463
49.52	616		759	345	474	49.52	539	539	2195	481	480
49.54	567		687	369	490	49.54	519	519	2185	476	509
49.56	531		728	354	454	49.56	503	503	2187	504	479
49.58	455		662	333	484	49.58	516	516	2145	446	484
49.6	467		641	349	479	49.6	516	516	2148	423	522
49.62	436		589	328	461	49.62	530	530	2181	461	475
49.64	396		608	373	506	49.64	528	528	2178	496	483
49.66	390		568	328	472	49.66	546	546	2167	472	445
49.68	363		580	325	494	49.68	519	519	2163	469	487
49.7	397		590	331	477	49.7	516	516	2197	461	484
49.72	349		595	328	463	49.72	510	510	2176	473	437
49.74	352		548	309	511	49.74	506	506	2055	477	442
49.76	344		551	361	479	49.76	493	493	2217	425	509
49.78	399		539	329	462	49.78	494	494	2188	507	466
49.8	358		510	327	508	49.8	523	523	2152	478	453
49.82	336		513	315	472	49.82	499	499	2244	474	464
49.84	350		490	328	473	49.84	505	505	2152	480	454
49.86	380		512	323	476	49.86	497	497	2144	481	455
49.88	345		471	337	455	49.88	557	557	2188	462	493
49.9	352		479	323	500	49.9	526	526	2164	458	509
49.92	339		460	340	442	49.92	504	504	2216	470	434
49.94	381		480	328	448	49.94	494	494	2267	467	485
49.96	345		487	321	487	49.96	536	536	2200	480	474
[truncated: 1,002 more rows]

## Sheet: Section B -XRD
XRD for conversion to titania
As Made ZnO and Zn2TiO4 (figure 2a)		After acid wash (Figure 2b)		After redution (figure 2c)	HP-TiO2		Film of Zn2O4 Only		After reduction	P-TiO2			D-TiO2
two theta	Intensity	Two theta	Acid Wash	Two theta	Intensity		Two theta	Intensity	Two theta	Intensity		Two theta	Intensity
15.002	508	10.002	1043	10	966		15.002	409	10	571		10	594
15.0223	501	10.0223	941	10.02	1002		15.0223	381	10.02	594		10.04	549
15.0426	481	10.0426	1010	10.04	1018		15.0426	431	10.04	630		10.08	530
15.0628	500	10.0628	958	10.06	1010		15.0628	420	10.06	638		10.12	616
15.0831	477	10.0831	924	10.08	1028		15.0831	394	10.08	607		10.16	555
15.1033	478	10.1033	931	10.1	989		15.1033	436	10.1	606		10.2	511
15.1236	504	10.1236	989	10.12	988		15.1236	443	10.12	578		10.24	567
15.1439	502	10.1439	1012	10.14	953		15.1439	427	10.14	585		10.28	551
15.1641	488	10.1641	964	10.16	1049		15.1641	429	10.16	594		10.32	516
15.1844	484	10.1844	960	10.18	1010		15.1844	422	10.18	559		10.36	538
15.2046	515	10.2046	890	10.2	1016		15.2046	458	10.2	593		10.4	583
15.2249	516	10.2249	968	10.22	947		15.2249	430	10.22	602		10.44	533
15.2451	487	10.2451	966	10.24	1009		15.2451	428	10.24	571		10.48	559
15.2654	511	10.2654	981	10.26	1040		15.2654	437	10.26	599		10.52	519
15.2857	502	10.2857	999	10.28	1029		15.2857	409	10.28	596		10.56	548
15.3059	535	10.3059	982	10.3	968		15.3059	422	10.3	571		10.6	532
15.3262	468	10.3262	1002	10.32	1017		15.3262	442	10.32	606		10.64	531
15.3464	500	10.3464	900	10.34	1019		15.3464	427	10.34	623		10.68	575
15.3667	486	10.3667	978	10.36	972		15.3667	442	10.36	588		10.72	559
15.3869	510	10.3869	980	10.38	992		15.3869	432	10.38	626		10.76	499
15.4072	526	10.4072	936	10.4	966		15.4072	451	10.4	626		10.8	546
15.4275	514	10.4275	999	10.42	977		15.4275	381	10.42	591		10.84	550
15.4477	493	10.4477	958	10.44	966		15.4477	424	10.44	578		10.88	594
15.468	499	10.468	978	10.46	990		15.468	433	10.46	570		10.92	573
15.4882	504	10.4882	976	10.48	980		15.4882	425	10.48	586		10.96	532
15.5085	558	10.5085	950	10.5	991		15.5085	423	10.5	609		11	559
15.5287	538	10.5287	940	10.52	1004		15.5287	431	10.52	570		11.04	551
15.549	452	10.549	1038	10.54	1015		15.549	437	10.54	565		11.08	494
15.5693	563	10.5693	940	10.56	969		15.5693	400	10.56	561		11.12	513
15.5895	571	10.5895	1001	10.58	987		15.5895	415	10.58	593		11.16	540
15.6098	536	10.6098	902	10.6	995		15.6098	414	10.6	580		11.2	544
15.63	567	10.63	975	10.62	1008		15.63	437	10.62	549		11.24	530
15.6503	476	10.6503	938	10.64	960		15.6503	413	10.64	573		11.28	519
15.6705	547	10.6705	1043	10.66	986		15.6705	410	10.66	585		11.32	489
15.6908	529	10.6908	984	10.68	976		15.6908	415	10.68	615		11.36	595
15.7111	540	10.7111	980	10.7	914		15.7111	424	10.7	587		11.4	547
15.7313	479	10.7313	979	10.72	958		15.7313	408	10.72	566		11.44	548
15.7516	486	10.7516	997	10.74	974		15.7516	392	10.74	539		11.48	511
15.7718	529	10.7718	936	10.76	968		15.7718	409	10.76	553		11.52	519
15.7921	528	10.7921	984	10.78	950		15.7921	428	10.78	563		11.56	553
15.8123	526	10.8123	979	10.8	965		15.8123	414	10.8	559		11.6	538
15.8326	543	10.8326	955	10.82	956		15.8326	429	10.82	600		11.64	505
15.8529	513	10.8529	983	10.84	940		15.8529	433	10.84	591		11.68	567
15.8731	506	10.8731	983	10.86	974		15.8731	456	10.86	580		11.72	532
15.8934	563	10.8934	969	10.88	1050		15.8934	423	10.88	551		11.76	510
15.9136	530	10.9136	989	10.9	993		15.9136	462	10.9	530		11.8	520
15.9339	519	10.9339	929	10.92	975		15.9339	411	10.92	572		11.84	543
15.9541	516	10.9541	988	10.94	979		15.9541	453	10.94	534		11.88	557
15.9744	523	10.9744	927	10.96	990		15.9744	444	10.96	561		11.92	538
15.9947	552	10.9947	954	10.98	984		15.9947	467	10.98	550		11.96	500
16.0149	539	11.0149	946	11	966		16.0149	445	11	599		12	554
16.0352	537	11.0352	1068	11.02	940		16.0352	475	11.02	613		12.04	556
16.0554	501	11.0554	1016	11.04	980		16.0554	445	11.04	596		12.08	511
16.0757	545	11.0757	986	11.06	997		16.0757	448	11.06	544		12.12	545
16.0959	532	11.0959	940	11.08	1038		16.0959	449	11.08	573		12.16	548
16.1162	549	11.1162	959	11.1	977		16.1162	466	11.1	536		12.2	528
16.1365	569	11.1365	1034	11.12	982		16.1365	414	11.12	564		12.24	494
16.1567	532	11.1567	973	11.14	909		16.1567	444	11.14	558		12.28	548
16.177	541	11.177	1013	11.16	949		16.177	440	11.16	587		12.32	543
16.1972	491	11.1972	977	11.18	929		16.1972	421	11.18	545		12.36	529
16.2175	527	11.2175	948	11.2	950		16.2175	467	11.2	562		12.4	518
16.2377	551	11.2377	986	11.22	976		16.2377	447	11.22	580		12.44	530
16.258	568	11.258	1023	11.24	983		16.258	442	11.24	548		12.48	560
16.2783	585	11.2783	967	11.26	975		16.2783	474	11.26	521		12.52	531
16.2985	548	11.2985	967	11.28	950		16.2985	441	11.28	590		12.56	517
16.3188	534	11.3188	932	11.3	938		16.3188	474	11.3	587		12.6	549
16.339	568	11.339	982	11.32	967		16.339	477	11.32	562		12.64	536
16.3593	551	11.3593	966	11.34	1001		16.3593	440	11.34	593		12.68	586
16.3795	530	11.3795	904	11.36	956		16.3795	471	11.36	554		12.72	521
16.3998	539	11.3998	990	11.38	984		16.3998	471	11.38	541		12.76	551
16.4201	616	11.4201	1005	11.4	931		16.4201	437	11.4	561		12.8	529
16.4403	557	11.4403	999	11.42	960		16.4403	470	11.42	550		12.84	565
16.4606	576	11.4606	993	11.44	990		16.4606	422	11.44	528		12.88	528
16.4808	532	11.4808	954	11.46	956		16.4808	488	11.46	610		12.92	542
16.5011	576	11.5011	974	11.48	960		16.5011	471	11.48	582		12.96	513
16.5213	585	11.5213	921	11.5	915		16.5213	483	11.5	542		13	573
16.5416	546	11.5416	970	11.52	958		16.5416	454	11.52	579		13.04	519
16.5619	526	11.5619	978	11.54	1021		16.5619	487	11.54	584		13.08	540
16.5821	493	11.5821	906	11.56	933		16.5821	447	11.56	566		13.12	583
16.6024	550	11.6024	990	11.58	896		16.6024	460	11.58	565		13.16	527
16.6226	576	11.6226	929	11.6	985		16.6226	445	11.6	590		13.2	568
16.6429	579	11.6429	961	11.62	979		16.6429	496	11.62	623		13.24	570
16.6631	644	11.6631	933	11.64	940		16.6631	449	11.64	598		13.28	514
16.6834	569	11.6834	951	11.66	977		16.6834	472	11.66	548		13.32	560
16.7037	552	11.7037	980	11.68	972		16.7037	507	11.68	559		13.36	564
16.7239	638	11.7239	964	11.7	992		16.7239	471	11.7	560		13.4	546
16.7442	556	11.7442	989	11.72	972		16.7442	460	11.72	529		13.44	578
16.7644	513	11.7644	968	11.74	941		16.7644	475	11.74	516		13.48	535
16.7847	570	11.7847	961	11.76	951		16.7847	452	11.76	540		13.52	559
16.8049	596	11.8049	1005	11.78	914		16.8049	506	11.78	575		13.56	514
16.8252	585	11.8252	942	11.8	895		16.8252	428	11.8	566		13.6	550
16.8455	636	11.8455	931	11.82	992		16.8455	480	11.82	568		13.64	488
16.8657	561	11.8657	993	11.84	964		16.8657	461	11.84	539		13.68	534
16.886	531	11.886	898	11.86	919		16.886	482	11.86	602		13.72	564
16.9062	541	11.9062	1007	11.88	954		16.9062	485	11.88	586		13.76	549
16.9265	578	11.9265	945	11.9	964		16.9265	483	11.9	555		13.8	532
16.9467	595	11.9467	980	11.92	904		16.9467	505	11.92	530		13.84	527
16.967	603	11.967	919	11.94	931		16.967	462	11.94	555		13.88	513
16.9873	582	11.9873	914	11.96	946		16.9873	474	11.96	551		13.92	530
17.0075	603	12.0075	978	11.98	974		17.0075	503	11.98	553		13.96	540
17.0278	580	12.0278	943	12	934		17.0278	505	12	549		14	545
17.048	580	12.048	924	12.02	951		17.048	467	12.02	602		14.04	525
17.0683	515	12.0683	961	12.04	924		17.0683	479	12.04	560		14.08	587
17.0885	545	12.0885	956	12.06	976		17.0885	531	12.06	511		14.12	544
17.1088	595	12.1088	974	12.08	940		17.1088	470	12.08	594		14.16	554
17.1291	573	12.1291	963	12.1	930		17.1291	470	12.1	557		14.2	541
17.1493	597	12.1493	917	12.12	908		17.1493	458	12.12	526		14.24	584
17.1696	591	12.1696	944	12.14	992		17.1696	471	12.14	568		14.28	556
17.1898	559	12.1898	1003	12.16	975		17.1898	514	12.16	535		14.32	542
17.2101	616	12.2101	880	12.18	967		17.2101	527	12.18	587		14.36	546
17.2303	635	12.2303	955	12.2	968		17.2303	498	12.2	530		14.4	566
17.2506	600	12.2506	961	12.22	953		17.2506	508	12.22	570		14.44	585
17.2709	572	12.2709	933	12.24	960		17.2709	499	12.24	537		14.48	559
17.2911	596	12.2911	900	12.26	961		17.2911	500	12.26	591		14.52	567
17.3114	572	12.3114	957	12.28	925		17.3114	461	12.28	569		14.56	542
17.3316	596	12.3316	965	12.3	947		17.3316	493	12.3	529		14.6	520
17.3519	594	12.3519	991	12.32	968		17.3519	538	12.32	597		14.64	579
17.3721	603	12.3721	935	12.34	979		17.3721	459	12.34	576		14.68	590
17.3924	608	12.3924	914	12.36	923		17.3924	524	12.36	557		14.72	541
17.4127	636	12.4127	968	12.38	872		17.4127	510	12.38	555		14.76	551
17.4329	614	12.4329	967	12.4	924		17.4329	544	12.4	551		14.8	568
17.4532	593	12.4532	904	12.42	989		17.4532	512	12.42	572		14.84	547
17.4734	604	12.4734	1000	12.44	974		17.4734	443	12.44	510		14.88	579
17.4937	619	12.4937	956	12.46	964		17.4937	495	12.46	552		14.92	577
17.5139	603	12.5139	953	12.48	947		17.5139	540	12.48	542		14.96	574
17.5342	610	12.5342	993	12.5	926		17.5342	534	12.5	592		15	592
17.5545	623	12.5545	935	12.52	989		17.5545	540	12.52	607		15.04	572
17.5747	562	12.5747	970	12.54	966		17.5747	507	12.54	554		15.08	564
17.595	591	12.595	924	12.56	976		17.595	510	12.56	563		15.12	573
17.6152	613	12.6152	937	12.58	945		17.6152	524	12.58	549		15.16	555
17.6355	614	12.6355	895	12.6	934		17.6355	551	12.6	568		15.2	586
17.6557	681	12.6557	1054	12.62	959		17.6557	566	12.62	573		15.24	594
17.676	608	12.676	942	12.64	964		17.676	489	12.64	534		15.28	577
17.6963	601	12.6963	982	12.66	884		17.6963	504	12.66	580		15.32	610
17.7165	644	12.7165	964	12.68	947		17.7165	501	12.68	551		15.36	587
17.7368	610	12.7368	925	12.7	954		17.7368	515	12.7	555		15.4	536
17.757	615	12.757	972	12.72	954		17.757	545	12.72	549		15.44	585
17.7773	633	12.7773	1025	12.74	923		17.7773	549	12.74	550		15.48	552
17.7975	636	12.7975	981	12.76	959		17.7975	515	12.76	545		15.52	569
17.8178	670	12.8178	978	12.78	942		17.8178	525	12.78	612		15.56	604
17.8381	670	12.8381	968	12.8	889		17.8381	519	12.8	592		15.6	607
17.8583	626	12.8583	922	12.82	931		17.8583	538	12.82	580		15.64	652
17.8786	607	12.8786	947	12.84	941		17.8786	505	12.84	542		15.68	637
17.8988	639	12.8988	941	12.86	978		17.8988	528	12.86	592		15.72	647
17.9191	674	12.9191	927	12.88	908		17.9191	532	12.88	567		15.76	624
17.9393	643	12.9393	924	12.9	1006		17.9393	523	12.9	560		15.8	619
17.9596	687	12.9596	965	12.92	967		17.9596	475	12.92	576		15.84	606
17.9799	648	12.9799	982	12.94	986		17.9799	508	12.94	536		15.88	611
18.0001	631	13.0001	900	12.96	934		18.0001	546	12.96	580		15.92	656
18.0204	682	13.0204	927	12.98	951		18.0204	542	12.98	569		15.96	578
18.0406	625	13.0406	991	13	990		18.0406	559	13	577		16	611
18.0609	651	13.0609	889	13.02	1011		18.0609	575	13.02	576		16.04	664
18.0811	725	13.0811	965	13.04	985		18.0811	546	13.04	577		16.08	650
18.1014	682	13.1014	934	13.06	934		18.1014	536	13.06	533		16.12	601
18.1217	680	13.1217	1002	13.08	984		18.1217	540	13.08	560		16.16	631
18.1419	682	13.1419	925	13.1	967		18.1419	599	13.1	556		16.2	694
18.1622	650	13.1622	976	13.12	979		18.1622	552	13.12	595		16.24	658
18.1824	691	13.1824	972	13.14	997		18.1824	541	13.14	528		16.28	639
18.2027	688	13.2027	934	13.16	940		18.2027	539	13.16	599		16.32	660
18.2229	684	13.2229	983	13.18	982		18.2229	544	13.18	603		16.36	685
18.2432	712	13.2432	935	13.2	953		18.2432	576	13.2	602		16.4	710
18.2635	730	13.2635	964	13.22	944		18.2635	599	13.22	546		16.44	585
18.2837	741	13.2837	947	13.24	1025		18.2837	605	13.24	570		16.48	647
18.304	751	13.304	961	13.26	962		18.304	579	13.26	570		16.52	679
18.3242	724	13.3242	996	13.28	901		18.3242	616	13.28	571		16.56	690
18.3445	748	13.3445	906	13.3	985		18.3445	615	13.3	558		16.6	678
18.3647	761	13.3647	937	13.32	995		18.3647	627	13.32	555		16.64	673
18.385	792	13.385	991	13.34	973		18.385	591	13.34	560		16.68	639
18.4053	785	13.4053	941	13.36	981		18.4053	602	13.36	533		16.72	682
18.4255	839	13.4255	997	13.38	1036		18.4255	581	13.38	526		16.76	706
18.4458	779	13.4458	991	13.4	984		18.4458	611	13.4	593		16.8	700
18.466	762	13.466	960	13.42	958		18.466	674	13.42	547		16.84	696
18.4863	826	13.4863	919	13.44	999		18.4863	644	13.44	589		16.88	704
18.5066	779	13.5066	948	13.46	971		18.5066	680	13.46	571		16.92	685
18.5268	721	13.5268	1001	13.48	947		18.5268	645	13.48	606		16.96	713
18.5471	758	13.5471	994	13.5	1034		18.5471	629	13.5	563		17	677
18.5673	769	13.5673	984	13.52	962		18.5673	655	13.52	545		17.04	739
18.5876	743	13.5876	995	13.54	995		18.5876	664	13.54	547		17.08	718
18.6078	733	13.6078	945	13.56	1018		18.6078	636	13.56	553		17.12	744
18.6281	749	13.6281	965	13.58	1025		18.6281	618	13.58	592		17.16	771
18.6484	690	13.6484	976	13.6	987		18.6484	614	13.6	588		17.2	772
18.6686	753	13.6686	971	13.62	1026		18.6686	584	13.62	579		17.24	720
18.6889	740	13.6889	948	13.64	1056		18.6889	544	13.64	575		17.28	764
18.7091	683	13.7091	932	13.66	1035		18.7091	585	13.66	547		17.32	752
18.7294	723	13.7294	1012	13.68	1012		18.7294	600	13.68	540		17.36	772
18.7496	736	13.7496	1002	13.7	970		18.7496	587	13.7	578		17.4	760
18.7699	671	13.7699	924	13.72	1039		18.7699	575	13.72	570		17.44	779
18.7902	696	13.7902	985	13.74	971		18.7902	550	13.74	567		17.48	747
18.8104	765	13.8104	959	13.76	1031		18.8104	589	13.76	552		17.52	700
18.8307	694	13.8307	944	13.78	1070		18.8307	547	13.78	574		17.56	805
18.8509	719	13.8509	958	13.8	1019		18.8509	584	13.8	623		17.6	747
18.8712	723	13.8712	968	13.82	992		18.8712	581	13.82	547		17.64	824
18.8914	772	13.8914	1009	13.84	1081		18.8914	585	13.84	543		17.68	761
18.9117	730	13.9117	1043	13.86	1013		18.9117	546	13.86	633		17.72	823
18.932	694	13.932	967	13.88	999		18.932	559	13.88	640		17.76	787
18.9522	710	13.9522	955	13.9	1026		18.9522	617	13.9	569		17.8	822
18.9725	740	13.9725	1012	13.92	969		18.9725	578	13.92	591		17.84	755
18.9927	712	13.9927	999	13.94	1007		18.9927	610	13.94	596		17.88	777
19.013	661	14.013	974	13.96	1042		19.013	582	13.96	569		17.92	794
19.0332	735	14.0332	1000	13.98	989		19.0332	618	13.98	588		17.96	821
19.0535	692	14.0535	996	14	1016		19.0535	594	14	589		18	848
19.0738	753	14.0738	893	14.02	1019		19.0738	590	14.02	598		18.04	761
19.094	769	14.094	967	14.04	1070		19.094	607	14.04	616		18.08	849
19.1143	742	14.1143	1000	14.06	1035		19.1143	580	14.06	603		18.12	857
19.1345	794	14.1345	973	14.08	1089		19.1345	596	14.08	597		18.16	864
19.1548	741	14.1548	993	14.1	1056		19.1548	643	14.1	621		18.2	843
19.175	759	14.175	919	14.12	1033		19.175	580	14.12	614		18.24	846
19.1953	713	14.1953	965	14.14	1058		19.1953	566	14.14	658		18.28	875
19.2156	739	14.2156	958	14.16	1053		19.2156	595	14.16	616		18.32	865
19.2358	787	14.2358	991	14.18	1101		19.2358	577	14.18	662		18.36	870
19.2561	773	14.2561	1002	14.2	1037		19.2561	562	14.2	645		18.4	868
19.2763	779	14.2763	1030	14.22	1062		19.2763	644	14.22	593		18.44	848
19.2966	714	14.2966	949	14.24	1020		19.2966	633	14.24	647		18.48	855
19.3168	744	14.3168	975	14.26	1071		19.3168	582	14.26	636		18.52	902
19.3371	800	14.3371	957	14.28	1131		19.3371	600	14.28	610		18.56	935
19.3574	787	14.3574	919	14.3	1051		19.3574	624	14.3	654		18.6	939
19.3776	738	14.3776	930	14.32	1058		19.3776	582	14.32	587		18.64	897
19.3979	803	14.3979	1020	14.34	1028		19.3979	628	14.34	631		18.68	922
19.4181	709	14.4181	1055	14.36	985		19.4181	676	14.36	610		18.72	964
19.4384	792	14.4384	982	14.38	1034		19.4384	590	14.38	582		18.76	983
19.4586	829	14.4586	1002	14.4	1097		19.4586	592	14.4	607		18.8	1004
19.4789	808	14.4789	978	14.42	1077		19.4789	606	14.42	634		18.84	948
19.4992	742	14.4992	1039	14.44	1076		19.4992	647	14.44	650		18.88	970
19.5194	738	14.5194	981	14.46	1077		19.5194	593	14.46	639		18.92	918
19.5397	791	14.5397	963	14.48	1093		19.5397	616	14.48	620		18.96	972
19.5599	788	14.5599	958	14.5	1075		19.5599	640	14.5	670		19	952
19.5802	756	14.5802	1004	14.52	1080		19.5802	605	14.52	651		19.04	945
19.6004	764	14.6004	1016	14.54	1088		19.6004	648	14.54	592		19.08	1004
19.6207	798	14.6207	966	14.56	1054		19.6207	668	14.56	633		19.12	941
19.641	786	14.641	980	14.58	1082		19.641	605	14.58	651		19.16	973
19.6612	760	14.6612	964	14.6	1073		19.6612	664	14.6	651		19.2	977
19.6815	778	14.6815	976	14.62	1108		19.6815	601	14.62	631		19.24	948
19.7017	759	14.7017	1048	14.64	1035		19.7017	611	14.64	642		19.28	983
19.722	791	14.722	996	14.66	1045		19.722	623	14.66	660		19.32	1020
19.7422	772	14.7422	1022	14.68	1093		19.7422	671	14.68	643		19.36	1018
19.7625	760	14.7625	1000	14.7	1066		19.7625	618	14.7	599		19.4	1035
19.7828	757	14.7828	1021	14.72	1041		19.7828	642	14.72	632		19.44	1002
19.803	757	14.803	1059	14.74	1055		19.803	646	14.74	599		19.48	1004
19.8233	798	14.8233	1047	14.76	1128		19.8233	677	14.76	629		19.52	1041
19.8435	807	14.8435	998	14.78	1029		19.8435	638	14.78	632		19.56	1038
19.8638	756	14.8638	1040	14.8	1064		19.8638	640	14.8	675		19.6	1040
19.884	803	14.884	1095	14.82	1061		19.884	615	14.82	680		19.64	1071
19.9043	802	14.9043	1008	14.84	1106		19.9043	643	14.84	613		19.68	1085
19.9246	801	14.9246	994	14.86	1080		19.9246	600	14.86	589		19.72	1052
19.9448	817	14.9448	1019	14.88	1053		19.9448	703	14.88	647		19.76	1010
19.9651	823	14.9651	1064	14.9	1134		19.9651	659	14.9	627		19.8	1060
19.9853	813	14.9853	984	14.92	1093		19.9853	624	14.92	641		19.84	1083
20.0056	808	15.0056	1020	14.94	1062		20.0056	614	14.94	639		19.88	1037
20.0258	842	15.0258	1028	14.96	1064		20.0258	713	14.96	655		19.92	1107
20.0461	817	15.0461	1042	14.98	1103		20.0461	653	14.98	681		19.96	1110
20.0664	785	15.0664	1038	15	1102		20.0664	686	15	660		20	1071
20.0866	812	15.0866	1003	15.02	1154		20.0866	699	15.02	665		20.04	1061
20.1069	831	15.1069	1040	15.04	1160		20.1069	604	15.04	633		20.08	1145
20.1271	777	15.1271	1031	15.06	1073		20.1271	679	15.06	658		20.12	1130
20.1474	831	15.1474	1019	15.08	1115		20.1474	682	15.08	656		20.16	1091
20.1676	772	15.1676	994	15.1	1089		20.1676	701	15.1	670		20.2	1089
20.1879	784	15.1879	1032	15.12	1111		20.1879	690	15.12	612		20.24	1029
20.2082	782	15.2082	1036	15.14	1079		20.2082	659	15.14	638		20.28	1093
20.2284	847	15.2284	1039	15.16	1175		20.2284	690	15.16	655		20.32	1083
20.2487	836	15.2487	1008	15.18	1147		20.2487	621	15.18	630		20.36	1070
20.2689	814	15.2689	1069	15.2	1176		20.2689	684	15.2	610		20.4	1015
20.2892	834	15.2892	1040	15.22	1117		20.2892	694	15.22	645		20.44	1101
20.3094	859	15.3094	1021	15.24	1071		20.3094	655	15.24	656		20.48	1094
20.3297	798	15.3297	1023	15.26	1180		20.3297	657	15.26	634		20.52	1140
20.35	826	15.35	1077	15.28	1138		20.35	663	15.28	643		20.56	1112
20.3702	826	15.3702	995	15.3	1109		20.3702	673	15.3	694		20.6	1111
20.3905	814	15.3905	1115	15.32	1127		20.3905	679	15.32	680		20.64	1130
20.4107	844	15.4107	992	15.34	1114		20.4107	691	15.34	697		20.68	1088
20.431	838	15.431	1034	15.36	1164		20.431	654	15.36	680		20.72	1143
20.4512	804	15.4512	1075	15.38	1147		20.4512	697	15.38	636		20.76	1089
20.4715	825	15.4715	1043	15.4	1124		20.4715	703	15.4	644		20.8	1096
20.4918	860	15.4918	1070	15.42	1218		20.4918	647	15.42	671		20.84	1111
20.512	860	15.512	1009	15.44	1162		20.512	656	15.44	650		20.88	1183
20.5323	871	15.5323	1097	15.46	1198		20.5323	680	15.46	636		20.92	1104
20.5525	891	15.5525	1055	15.48	1244		20.5525	681	15.48	684		20.96	1066
20.5728	807	15.5728	1104	15.5	1175		20.5728	704	15.5	682		21	1086
20.593	902	15.593	1026	15.52	1165		20.593	680	15.52	678		21.04	1116
20.6133	887	15.6133	1069	15.54	1189		20.6133	704	15.54	644		21.08	1061
20.6336	884	15.6336	1052	15.56	1137		20.6336	711	15.56	679		21.12	1055
20.6538	857	15.6538	1064	15.58	1196		20.6538	669	15.58	673		21.16	1066
20.6741	836	15.6741	1090	15.6	1198		20.6741	722	15.6	690		21.2	1080
20.6943	855	15.6943	1075	15.62	1198		20.6943	717	15.62	692		21.24	1051
20.7146	835	15.7146	1097	15.64	1173		20.7146	689	15.64	677		21.28	1104
20.7348	875	15.7348	1111	15.66	1151		20.7348	690	15.66	692		21.32	1132
20.7551	843	15.7551	1110	15.68	1188		20.7551	734	15.68	708		21.36	1080
20.7754	907	15.7754	1074	15.7	1182		20.7754	696	15.7	688		21.4	1124
20.7956	871	15.7956	1090	15.72	1136		20.7956	741	15.72	713		21.44	1071
20.8159	883	15.8159	1015	15.74	1180		20.8159	717	15.74	709		21.48	1036
20.8361	932	15.8361	1029	15.76	1115		20.8361	689	15.76	765		21.52	1062
20.8564	934	15.8564	1069	15.78	1205		20.8564	695	15.78	696		21.56	1105
20.8766	897	15.8766	1115	15.8	1137		20.8766	726	15.8	667		21.6	1031
20.8969	869	15.8969	1088	15.82	1175		20.8969	756	15.82	670		21.64	1132
20.9172	838	15.9172	1218	15.84	1195		20.9172	697	15.84	703		21.68	1110
20.9374	896	15.9374	1126	15.86	1183		20.9374	735	15.86	681		21.72	1046
20.9577	839	15.9577	1077	15.88	1159		20.9577	700	15.88	686		21.76	1063
20.9779	900	15.9779	1078	15.9	1219		20.9779	677	15.9	684		21.8	1090
20.9982	875	15.9982	1065	15.92	1244		20.9982	733	15.92	766		21.84	1096
21.0184	943	16.0184	1102	15.94	1208		21.0184	724	15.94	720		21.88	1021
21.0387	916	16.0387	1125	15.96	1212		21.0387	698	15.96	673		21.92	1023
21.059	846	16.059	1132	15.98	1204		21.059	716	15.98	731		21.96	998
21.0792	885	16.0792	1083	16	1181		21.0792	709	16	719		22	1047
21.0995	864	16.0995	1085	16.02	1247		21.0995	679	16.02	714		22.04	1059
21.1197	868	16.1197	1114	16.04	1259		21.1197	777	16.04	666		22.08	1036
21.14	936	16.14	1130	16.06	1240		21.14	747	16.06	705		22.12	1055
21.1602	918	16.1602	1128	16.08	1227		21.1602	696	16.08	748		22.16	1037
21.1805	879	16.1805	1159	16.1	1210		21.1805	705	16.1	693		22.2	987
21.2008	881	16.2008	1132	16.12	1227		21.2008	677	16.12	677		22.24	933
21.221	869	16.221	1082	16.14	1274		21.221	723	16.14	672		22.28	963
21.2413	937	16.2413	1079	16.16	1235		21.2413	690	16.16	720		22.32	1002
21.2615	952	16.2615	1028	16.18	1235		21.2615	779	16.18	738		22.36	1016
21.2818	911	16.2818	1139	16.2	1249		21.2818	686	16.2	722		22.4	1010
21.302	870	16.302	1183	16.22	1242		21.302	726	16.22	728		22.44	956
21.3223	870	16.3223	1079	16.24	1285		21.3223	714	16.24	697		22.48	966
21.3426	897	16.3426	1134	16.26	1248		21.3426	714	16.26	743		22.52	928
21.3628	877	16.3628	1078	16.28	1255		21.3628	725	16.28	743		22.56	1002
21.3831	927	16.3831	1102	16.3	1230		21.3831	708	16.3	752		22.6	976
21.4033	933	16.4033	1070	16.32	1248		21.4033	741	16.32	760		22.64	897
21.4236	971	16.4236	1151	16.34	1230		21.4236	679	16.34	734		22.68	955
21.4438	956	16.4438	1144	16.36	1259		21.4438	755	16.36	727		22.72	944
21.4641	917	16.4641	1067	16.38	1236		21.4641	739	16.38	746		22.76	957
21.4844	905	16.4844	1139	16.4	1241		21.4844	810	16.4	757		22.8	916
21.5046	902	16.5046	1163	16.42	1174		21.5046	706	16.42	750		22.84	861
21.5249	930	16.5249	1072	16.44	1261		21.5249	745	16.44	792		22.88	922
21.5451	942	16.5451	1115	16.46	1296		21.5451	704	16.46	730		22.92	944
21.5654	921	16.5654	1182	16.48	1285		21.5654	765	16.48	748		22.96	895
21.5856	933	16.5856	1145	16.5	1336		21.5856	725	16.5	751		23	881
21.6059	985	16.6059	1197	16.52	1306		21.6059	802	16.52	744		23.04	936
21.6262	928	16.6262	1143	16.54	1268		21.6262	804	16.54	739		23.08	900
21.6464	976	16.6464	1156	16.56	1286		21.6464	756	16.56	771		23.12	932
21.6667	973	16.6667	1165	16.58	1359		21.6667	803	16.58	758		23.16	915
21.6869	960	16.6869	1173	16.6	1228		21.6869	779	16.6	731		23.2	867
21.7072	945	16.7072	1174	16.62	1282		21.7072	715	16.62	762		23.24	849
21.7274	926	16.7274	1178	16.64	1302		21.7274	740	16.64	785		23.28	869
21.7477	943	16.7477	1107	16.66	1357		21.7477	661	16.66	777		23.32	824
21.768	1016	16.768	1151	16.68	1284		21.768	747	16.68	741		23.36	851
21.7882	986	16.7882	1178	16.7	1308		21.7882	771	16.7	814		23.4	864
21.8085	941	16.8085	1220	16.72	1274		21.8085	792	16.72	735		23.44	849
21.8287	988	16.8287	1196	16.74	1378		21.8287	770	16.74	806		23.48	772
21.849	922	16.849	1182	16.76	1317		21.849	800	16.76	756		23.52	836
21.8692	958	16.8692	1168	16.78	1302		21.8692	743	16.78	722		23.56	812
21.8895	870	16.8895	1266	16.8	1276		21.8895	781	16.8	806		23.6	820
21.9098	921	16.9098	1148	16.82	1363		21.9098	760	16.82	767		23.64	811
21.93	892	16.93	1199	16.84	1324		21.93	816	16.84	758		23.68	847
21.9503	958	16.9503	1254	16.86	1308		21.9503	741	16.86	742		23.72	783
21.9705	994	16.9705	1186	16.88	1363		21.9705	775	16.88	777		23.76	822
21.9908	1039	16.9908	1222	16.9	1371		21.9908	731	16.9	802		23.8	812
22.0111	959	17.0111	1242	16.92	1356		22.0111	746	16.92	795		23.84	811
22.0313	1027	17.0313	1230	16.94	1347		22.0313	778	16.94	781		23.88	794
22.0516	949	17.0516	1258	16.96	1436		22.0516	797	16.96	815		23.92	815
22.0718	944	17.0718	1167	16.98	1432		22.0718	794	16.98	792		23.96	794
22.0921	956	17.0921	1209	17	1304		22.0921	793	17	799		24	796
22.1123	956	17.1123	1208	17.02	1401		22.1123	763	17.02	751		24.04	782
22.1326	924	17.1326	1184	17.04	1376		22.1326	802	17.04	799		24.08	758
22.1529	962	17.1529	1195	17.06	1393		22.1529	847	17.06	827		24.12	801
22.1731	1021	17.1731	1235	17.08	1375		22.1731	787	17.08	782		24.16	750
22.1934	979	17.1934	1218	17.1	1427		22.1934	764	17.1	821		24.2	734
22.2136	969	17.2136	1228	17.12	1437		22.2136	779	17.12	795		24.24	814
22.2339	963	17.2339	1227	17.14	1367		22.2339	779	17.14	784		24.28	780
22.2541	1004	17.2541	1271	17.16	1448		22.2541	773	17.16	777		24.32	804
22.2744	936	17.2744	1238	17.18	1385		22.2744	766	17.18	790		24.36	741
22.2947	955	17.2947	1261	17.2	1373		22.2947	756	17.2	783		24.4	718
22.3149	968	17.3149	1176	17.22	1437		22.3149	777	17.22	809		24.44	724
22.3352	988	17.3352	1164	17.24	1376		22.3352	836	17.24	786		24.48	762
22.3554	972	17.3554	1276	17.26	1409		22.3554	791	17.26	813		24.52	795
22.3757	914	17.3757	1255	17.28	1416		22.3757	785	17.28	813		24.56	806
22.3959	934	17.3959	1212	17.3	1380		22.3959	823	17.3	816		24.6	735
22.4162	1003	17.4162	1218	17.32	1379		22.4162	781	17.32	799		24.64	816
22.4365	1029	17.4365	1248	17.34	1404		22.4365	835	17.34	842		24.68	858
22.4567	1014	17.4567	1278	17.36	1412		22.4567	788	17.36	835		24.72	917
22.477	1016	17.477	1273	17.38	1441		22.477	795	17.38	822		24.76	903
22.4972	1054	17.4972	1220	17.4	1406		22.4972	805	17.4	871		24.8	1055
22.5175	1000	17.5175	1290	17.42	1475		22.5175	761	17.42	826		24.84	1123
22.5377	974	17.5377	1282	17.44	1454		22.5377	772	17.44	853		24.88	1196
22.558	1048	17.558	1247	17.46	1443		22.558	838	17.46	877		24.92	1329
22.5783	1061	17.5783	1244	17.48	1516		22.5783	850	17.48	842		24.96	1422
22.5985	923	17.5985	1284	17.5	1487		22.5985	791	17.5	858		25	1398
22.6188	976	17.6188	1312	17.52	1427		22.6188	822	17.52	806		25.04	1491
22.639	982	17.639	1222	17.54	1491		22.639	780	17.54	807		25.08	1331
22.6593	909	17.6593	1239	17.56	1509		22.6593	820	17.56	884		25.12	1221
22.6795	1010	17.6795	1295	17.58	1512		22.6795	776	17.58	805		25.16	1121
22.6998	987	17.6998	1299	17.6	1417		22.6998	793	17.6	871		25.2	1008
22.7201	943	17.7201	1317	17.62	1402		22.7201	808	17.62	852		25.24	903
22.7403	1007	17.7403	1334	17.64	1535		22.7403	772	17.64	853		25.28	839
22.7606	1032	17.7606	1277	17.66	1525		22.7606	832	17.66	893		25.32	768
22.7808	1017	17.7808	1289	17.68	1473		22.7808	777	17.68	820		25.36	738
22.8011	1009	17.8011	1284	17.7	1475		22.8011	794	17.7	892		25.4	688
22.8213	1049	17.8213	1342	17.72	1438		22.8213	791	17.72	867		25.44	663
22.8416	1059	17.8416	1342	17.74	1485		22.8416	843	17.74	883		25.48	645
22.8619	1060	17.8619	1422	17.76	1560		22.8619	840	17.76	868		25.52	648
22.8821	1030	17.8821	1350	17.78	1565		22.8821	787	17.78	870		25.56	660
22.9024	1028	17.9024	1355	17.8	1469		22.9024	860	17.8	913		25.6	651
22.9226	992	17.9226	1396	17.82	1523		22.9226	814	17.82	891		25.64	600
22.9429	950	17.9429	1341	17.84	1483		22.9429	841	17.84	887		25.68	592
22.9631	1005	17.9631	1423	17.86	1574		22.9631	848	17.86	911		25.72	605
22.9834	1018	17.9834	1426	17.88	1541		22.9834	798	17.88	861		25.76	579
23.0037	977	18.0037	1467	17.9	1621		23.0037	848	17.9	895		25.8	567
23.0239	1003	18.0239	1434	17.92	1524		23.0239	769	17.92	905		25.84	611
23.0442	1015	18.0442	1403	17.94	1629		23.0442	921	17.94	943		25.88	564
23.0644	1048	18.0644	1434	17.96	1516		23.0644	832	17.96	890		25.92	540
23.0847	1004	18.0847	1506	17.98	1463		23.0847	778	17.98	918		25.96	610
23.1049	1010	18.1049	1470	18	1602		23.1049	781	18	974		26	520
23.1252	1009	18.1252	1481	18.02	1536		23.1252	783	18.02	938		26.04	567
23.1455	1014	18.1455	1487	18.04	1516		23.1455	807	18.04	911		26.08	524
23.1657	1034	18.1657	1480	18.06	1512		23.1657	831	18.06	900		26.12	541
23.186	1056	18.186	1453	18.08	1564		23.186	843	18.08	923		26.16	542
23.2062	997	18.2062	1474	18.1	1541		23.2062	833	18.1	920		26.2	539
23.2265	958	18.2265	1475	18.12	1602		23.2265	860	18.12	944		26.24	551
23.2467	1002	18.2467	1426	18.14	1569		23.2467	797	18.14	930		26.28	542
23.267	935	18.267	1483	18.16	1595		23.267	828	18.16	906		26.32	547
23.2873	958	18.2873	1417	18.18	1602		23.2873	779	18.18	924		26.36	514
23.3075	1015	18.3075	1472	18.2	1565		23.3075	813	18.2	923		26.4	507
23.3278	1028	18.3278	1394	18.22	1619		23.3278	792	18.22	894		26.44	527
23.348	1008	18.348	1388	18.24	1648		23.348	799	18.24	926		26.48	502
23.3683	1018	18.3683	1441	18.26	1653		23.3683	886	18.26	918		26.52	502
23.3885	1016	18.3885	1402	18.28	1641		23.3885	813	18.28	923		26.56	497
23.4088	1003	18.4088	1424	18.3	1642		23.4088	816	18.3	946		26.6	483
23.4291	982	18.4291	1433	18.32	1661		23.4291	818	18.32	894		26.64	486
23.4493	1015	18.4493	1533	18.34	1585		23.4493	792	18.34	882		26.68	483
23.4696	1026	18.4696	1372	18.36	1638		23.4696	840	18.36	989		26.72	435
23.4898	1012	18.4898	1363	18.38	1664		23.4898	840	18.38	928		26.76	485
23.5101	999	18.5101	1318	18.4	1668		23.5101	850	18.4	944		26.8	490
23.5303	1082	18.5303	1378	18.42	1645		23.5303	799	18.42	935		26.84	517
23.5506	1045	18.5506	1439	18.44	1651		23.5506	802	18.44	938		26.88	493
23.5709	1024	18.5709	1466	18.46	1592		23.5709	844	18.46	1015		26.92	495
23.5911	989	18.5911	1391	18.48	1674		23.5911	770	18.48	946		26.96	491
23.6114	1043	18.6114	1468	18.5	1688		23.6114	845	18.5	997		27	449
23.6316	1033	18.6316	1396	18.52	1695		23.6316	835	18.52	940		27.04	493
23.6519	1062	18.6519	1350	18.54	1773		23.6519	796	18.54	943		27.08	462
23.6721	997	18.6721	1469	18.56	1675		23.6721	824	18.56	956		27.12	443
23.6924	1053	18.6924	1452	18.58	1674		23.6924	817	18.58	977		27.16	472
23.7127	1044	18.7127	1451	18.6	1669		23.7127	776	18.6	937		27.2	447
23.7329	978	18.7329	1528	18.62	1697		23.7329	836	18.62	927		27.24	486
23.7532	1029	18.7532	1378	18.64	1664		23.7532	838	18.64	973		27.28	486
23.7734	1032	18.7734	1469	18.66	1707		23.7734	810	18.66	1021		27.32	496
23.7937	1003	18.7937	1459	18.68	1729		23.7937	864	18.68	986		27.36	422
23.8139	1006	18.8139	1425	18.7	1764		23.8139	813	18.7	991		27.4	464
23.8342	1043	18.8342	1380	18.72	1729		23.8342	860	18.72	995		27.44	425
23.8545	1046	18.8545	1446	18.74	1859		23.8545	832	18.74	1002		27.48	419
23.8747	1041	18.8747	1514	18.76	1766		23.8747	803	18.76	943		27.52	447
23.895	1034	18.895	1505	18.78	1736		23.895	824	18.78	957		27.56	451
23.9152	1062	18.9152	1469	18.8	1772		23.9152	835	18.8	975		27.6	469
23.9355	1062	18.9355	1465	18.82	1802		23.9355	842	18.82	1044		27.64	458
23.9557	1098	18.9557	1462	18.84	1723		23.9557	823	18.84	970		27.68	429
23.976	960	18.976	1442	18.86	1790		23.976	826	18.86	1025		27.72	431
23.9963	1031	18.9963	1515	18.88	1715		23.9963	853	18.88	1043		27.76	461
24.0165	1014	19.0165	1491	18.9	1728		24.0165	808	18.9	989		27.8	415
24.0368	1002	19.0368	1512	18.92	1810		24.0368	823	18.92	984		27.84	456
24.057	1063	19.057	1481	18.94	1675		24.057	829	18.94	989		27.88	426
24.0773	967	19.0773	1396	18.96	1836		24.0773	852	18.96	1034		27.92	416
24.0975	1035	19.0975	1468	18.98	1767		24.0975	830	18.98	1019		27.96	416
24.1178	949	19.1178	1532	19	1794		24.1178	862	19	952		28	395
24.1381	1056	19.1381	1431	19.02	1812		24.1381	784	19.02	1038		28.04	392
24.1583	1057	19.1583	1496	19.04	1858		24.1583	872	19.04	1055		28.08	359
24.1786	1014	19.1786	1519	19.06	1881		24.1786	861	19.06	1026		28.12	395
24.1988	1029	19.1988	1430	19.08	1844		24.1988	883	19.08	1053		28.16	431
24.2191	1063	19.2191	1504	19.1	1730		24.2191	860	19.1	1011		28.2	434
24.2393	1082	19.2393	1576	19.12	1763		24.2393	854	19.12	1037		28.24	418
24.2596	1007	19.2596	1512	19.14	1867		24.2596	875	19.14	1049		28.28	410
24.2799	1045	19.2799	1420	19.16	1852		24.2799	803	19.16	1105		28.32	420
24.3001	1023	19.3001	1522	19.18	1944		24.3001	862	19.18	1064		28.36	403
24.3204	998	19.3204	1542	19.2	1860		24.3204	828	19.2	1058		28.4	375
24.3406	1017	19.3406	1497	19.22	1857		24.3406	823	19.22	1160		28.44	414
24.3609	1037	19.3609	1530	19.24	1855		24.3609	860	19.24	1067		28.48	417
24.3811	1070	19.3811	1588	19.26	1887		24.3811	814	19.26	1081		28.52	399
24.4014	1008	19.4014	1509	19.28	1870		24.4014	819	19.28	1055		28.56	369
24.4217	1105	19.4217	1556	19.3	1826		24.4217	816	19.3	1040		28.6	383
24.4419	1062	19.4419	1558	19.32	1761		24.4419	811	19.32	1064		28.64	365
24.4622	1059	19.4622	1520	19.34	1875		24.4622	839	19.34	1064		28.68	405
24.4824	1011	19.4824	1520	19.36	1961		24.4824	867	19.36	1073		28.72	361
24.5027	1017	19.5027	1443	19.38	1876		24.5027	811	19.38	1119		28.76	427
24.5229	981	19.5229	1483	19.4	1837		24.5229	840	19.4	1135		28.8	389
24.5432	1065	19.5432	1539	19.42	1851		24.5432	842	19.42	1096		28.84	389
24.5635	994	19.5635	1529	19.44	1899		24.5635	819	19.44	1107		28.88	377
24.5837	1070	19.5837	1464	19.46	1996		24.5837	850	19.46	1127		28.92	358
24.604	1031	19.604	1573	19.48	1889		24.604	811	19.48	1089		28.96	395
24.6242	1006	19.6242	1626	19.5	1856		24.6242	827	19.5	1070		29	353
24.6445	1078	19.6445	1518	19.52	1875		24.6445	845	19.52	1137		29.04	401
24.6647	1062	19.6647	1530	19.54	1929		24.6647	835	19.54	1149		29.08	396
24.685	932	19.685	1571	19.56	1920		24.685	798	19.56	1094		29.12	378
24.7053	1022	19.7053	1509	19.58	1959		24.7053	815	19.58	1134		29.16	383
24.7255	1057	19.7255	1553	19.6	1916		24.7255	829	19.6	1096		29.2	343
24.7458	1050	19.7458	1595	19.62	1890		24.7458	799	19.62	1127		29.24	356
24.766	1147	19.766	1612	19.64	1966		24.766	805	19.64	1150		29.28	361
24.7863	1006	19.7863	1572	19.66	1910		24.7863	853	19.66	1183		29.32	341
24.8065	1057	19.8065	1585	19.68	1979		24.8065	850	19.68	1100		29.36	367
24.8268	1025	19.8268	1605	19.7	1907		24.8268	848	19.7	1160		29.4	348
24.8471	1002	19.8471	1632	19.72	1997		24.8471	863	19.72	1105		29.44	365
24.8673	1059	19.8673	1588	19.74	1952		24.8673	851	19.74	1074		29.48	328
24.8876	1066	19.8876	1574	19.76	2021		24.8876	757	19.76	1140		29.52	360
24.9078	1002	19.9078	1638	19.78	1964		24.9078	842	19.78	1082		29.56	356
24.9281	1028	19.9281	1540	19.8	2014		24.9281	862	19.8	1163		29.6	328
24.9483	1079	19.9483	1559	19.82	2069		24.9483	760	19.82	1218		29.64	351
24.9686	1056	19.9686	1550	19.84	1998		24.9686	796	19.84	1206		29.68	338
24.9889	996	19.9889	1647	19.86	1973		24.9889	851	19.86	1138		29.72	326
25.0091	1100	20.0091	1668	19.88	1997		25.0091	830	19.88	1189		29.76	369
25.0294	1019	20.0294	1664	19.9	2021		25.0294	832	19.9	1244		29.8	341
25.0496	1079	20.0496	1672	19.92	1982		25.0496	832	19.92	1186		29.84	350
25.0699	1072	20.0699	1644	19.94	2021		25.0699	822	19.94	1156		29.88	335
25.0901	999	20.0901	1620	19.96	2046		25.0901	844	19.96	1155		29.92	344
25.1104	1018	20.1104	1567	19.98	2029		25.1104	799	19.98	1200		29.96	326
25.1307	1100	20.1307	1650	20	2078		25.1307	901	20	1143		30	322
25.1509	1009	20.1509	1672	20.02	2101		25.1509	842	20.02	1077		30.04	311
25.1712	1069	20.1712	1690	20.04	2039		25.1712	854	20.04	1183		30.08	320
25.1914	1003	20.1914	1683	20.06	1986		25.1914	887	20.06	1204		30.12	353
25.2117	1032	20.2117	1745	20.08	2037		25.2117	817	20.08	1183		30.16	326
25.2319	1003	20.2319	1713	20.1	2003		25.2319	791	20.1	1199		30.2	333
25.2522	1021	20.2522	1652	20.12	2054		25.2522	797	20.12	1149		30.24	343
25.2725	1051	20.2725	1638	20.14	2049		25.2725	825	20.14	1135		30.28	323
25.2927	1011	20.2927	1698	20.16	2089		25.2927	849	20.16	1202		30.32	352
25.313	1073	20.313	1631	20.18	2071		25.313	836	20.18	1148		30.36	298
25.3332	1019	20.3332	1687	20.2	2018		25.3332	856	20.2	1235		30.4	335
25.3535	1049	20.3535	1667	20.22	2075		25.3535	824	20.22	1245		30.44	322
25.3738	1070	20.3738	1666	20.24	2117		25.3738	866	20.24	1233		30.48	338
25.394	1004	20.394	1689	20.26	2115		25.394	822	20.26	1192		30.52	336
25.4143	964	20.4143	1659	20.28	2197		25.4143	821	20.28	1214		30.56	305
25.4345	1029	20.4345	1777	20.3	2141		25.4345	828	20.3	1165		30.6	317
25.4548	1051	20.4548	1690	20.32	2045		25.4548	802	20.32	1210		30.64	363
25.475	1056	20.475	1695	20.34	2100		25.475	769	20.34	1215		30.68	324
25.4953	1013	20.4953	1637	20.36	2097		25.4953	841	20.36	1212		30.72	328
25.5156	1036	20.5156	1692	20.38	2079		25.5156	834	20.38	1270		30.76	300
25.5358	1062	20.5358	1685	20.4	2096		25.5358	835	20.4	1269		30.8	336
25.5561	1058	20.5561	1763	20.42	2105		25.5561	815	20.42	1204		30.84	322
25.5763	1044	20.5763	1710	20.44	2113		25.5763	864	20.44	1195		30.88	302
25.5966	1027	20.5966	1669	20.46	2085		25.5966	815	20.46	1237		30.92	322
25.6168	1032	20.6168	1767	20.48	2110		25.6168	812	20.48	1225		30.96	305
25.6371	1026	20.6371	1711	20.5	2201		25.6371	842	20.5	1244		31	311
25.6574	1033	20.6574	1735	20.52	2119		25.6574	857	20.52	1268		31.04	313
25.6776	1054	20.6776	1752	20.54	2105		25.6776	822	20.54	1302		31.08	314
25.6979	1043	20.6979	1757	20.56	2200		25.6979	856	20.56	1212		31.12	330
25.7181	1036	20.7181	1716	20.58	2200		25.7181	830	20.58	1192		31.16	292
25.7384	1070	20.7384	1785	20.6	2137		25.7384	810	20.6	1236		31.2	294
25.7586	1014	20.7586	1710	20.62	2128		25.7586	766	20.62	1266		31.24	310
25.7789	987	20.7789	1713	20.64	2145		25.7789	861	20.64	1262		31.28	294
25.7992	1084	20.7992	1701	20.66	2137		25.7992	771	20.66	1285		31.32	300
25.8194	1015	20.8194	1788	20.68	2245		25.8194	834	20.68	1194		31.36	308
25.8397	1035	20.8397	1753	20.7	2091		25.8397	814	20.7	1231		31.4	267
25.8599	986	20.8599	1764	20.72	2235		25.8599	793	20.72	1253		31.44	300
25.8802	1024	20.8802	1752	20.74	2176		25.8802	822	20.74	1189		31.48	291
25.9004	995	20.9004	1689	20.76	2209		25.9004	868	20.76	1306		31.52	279
25.9207	1012	20.9207	1776	20.78	2242		25.9207	773	20.78	1266		31.56	300
25.941	1056	20.941	1764	20.8	2334		25.941	837	20.8	1309		31.6	312
25.9612	1026	20.9612	1777	20.82	2213		25.9612	787	20.82	1296		31.64	299
25.9815	1033	20.9815	1725	20.84	2211		25.9815	800	20.84	1259		31.68	309
26.0017	1013	21.0017	1818	20.86	2211		26.0017	821	20.86	1275		31.72	291
26.022	990	21.022	1778	20.88	2173		26.022	858	20.88	1313		31.76	282
26.0422	973	21.0422	1795	20.9	2286		26.0422	725	20.9	1220		31.8	324
26.0625	998	21.0625	1783	20.92	2263		26.0625	794	20.92	1300		31.84	297
26.0828	1069	21.0828	1793	20.94	2321		26.0828	814	20.94	1257		31.88	268
26.103	979	21.103	1803	20.96	2246		26.103	839	20.96	1311		31.92	302
26.1233	983	21.1233	1733	20.98	2290		26.1233	829	20.98	1314		31.96	262
26.1435	987	21.1435	1861	21	2271		26.1435	814	21	1259		32	277
26.1638	1009	21.1638	1847	21.02	2375		26.1638	811	21.02	1324		32.04	298
26.184	1001	21.184	1782	21.04	2306		26.184	775	21.04	1264		32.08	309
26.2043	1110	21.2043	1824	21.06	2294		26.2043	819	21.06	1265		32.12	320
26.2246	1015	21.2246	1873	21.08	2255		26.2246	789	21.08	1311		32.16	269
26.2448	985	21.2448	1804	21.1	2373		26.2448	797	21.1	1294		32.2	277
26.2651	999	21.2651	1814	21.12	2299		26.2651	826	21.12	1339		32.24	284
26.2853	1033	21.2853	1687	21.14	2304		26.2853	807	21.14	1393		32.28	274
26.3056	1031	21.3056	1900	21.16	2332		26.3056	825	21.16	1314		32.32	286
26.3258	1020	21.3258	1775	21.18	2299		26.3258	839	21.18	1332		32.36	268
26.3461	1018	21.3461	1833	21.2	2299		26.3461	820	21.2	1282		32.4	295
26.3664	1022	21.3664	1915	21.22	2337		26.3664	804	21.22	1332		32.44	311
26.3866	1011	21.3866	1872	21.24	2274		26.3866	765	21.24	1258		32.48	268
26.4069	1025	21.4069	1776	21.26	2349		26.4069	809	21.26	1310		32.52	264
26.4271	982	21.4271	1779	21.28	2336		26.4271	800	21.28	1316		32.56	324
26.4474	1009	21.4474	1881	21.3	2385		26.4474	830	21.3	1305		32.6	254
26.4676	988	21.4676	1845	21.32	2320		26.4676	805	21.32	1383		32.64	272
26.4879	993	21.4879	1910	21.34	2400		26.4879	764	21.34	1279		32.68	273
26.5082	1025	21.5082	1789	21.36	2351		26.5082	769	21.36	1375		32.72	283
26.5284	1031	21.5284	1859	21.38	2325		26.5284	836	21.38	1344		32.76	284
26.5487	1027	21.5487	1880	21.4	2298		26.5487	770	21.4	1334		32.8	283
26.5689	1046	21.5689	1799	21.42	2318		26.5689	817	21.42	1422		32.84	284
26.5892	986	21.5892	1797	21.44	2399		26.5892	803	21.44	1380		32.88	291
26.6094	1013	21.6094	1846	21.46	2370		26.6094	779	21.46	1364		32.92	256
26.6297	947	21.6297	1866	21.48	2351		26.6297	792	21.48	1359		32.96	263
26.65	1034	21.65	1938	21.5	2398		26.65	786	21.5	1374		33	262
26.6702	965	21.6702	1822	21.52	2451		26.6702	779	21.52	1360		33.04	258
26.6905	1013	21.6905	1800	21.54	2340		26.6905	847	21.54	1438		33.08	302
26.7107	970	21.7107	1853	21.56	2369		26.7107	772	21.56	1309		33.12	284
26.731	1019	21.731	1846	21.58	2333		26.731	777	21.58	1439		33.16	293
26.7512	1051	21.7512	1866	21.6	2477		26.7512	799	21.6	1372		33.2	244
26.7715	1010	21.7715	1899	21.62	2400		26.7715	748	21.62	1327		33.24	255
26.7918	980	21.7918	1874	21.64	2347		26.7918	760	21.64	1324		33.28	252
26.812	999	21.812	1863	21.66	2433		26.812	797	21.66	1303		33.32	250
26.8323	1007	21.8323	1881	21.68	2366		26.8323	795	21.68	1361		33.36	272
26.8525	938	21.8525	1799	21.7	2455		26.8525	796	21.7	1410		33.4	256
26.8728	1010	21.8728	1865	21.72	2489		26.8728	761	21.72	1420		33.44	244
26.893	1020	21.893	1795	21.74	2460		26.893	801	21.74	1335		33.48	241
26.9133	1021	21.9133	1878	21.76	2440		26.9133	785	21.76	1425		33.52	265
26.9336	1003	21.9336	1822	21.78	2395		26.9336	813	21.78	1415		33.56	235
26.9538	966	21.9538	1875	21.8	2412		26.9538	797	21.8	1354		33.6	238
26.9741	1004	21.9741	1933	21.82	2443		26.9741	828	21.82	1397		33.64	241
26.9943	1033	21.9943	1915	21.84	2424		26.9943	794	21.84	1414		33.68	257
27.0146	979	22.0146	1875	21.86	2459		27.0146	806	21.86	1447		33.72	255
27.0348	985	22.0348	1907	21.88	2440		27.0348	814	21.88	1433		33.76	252
27.0551	944	22.0551	1833	21.9	2464		27.0551	822	21.9	1398		33.8	253
27.0754	1002	22.0754	1973	21.92	2377		27.0754	771	21.92	1401		33.84	240
27.0956	967	22.0956	1852	21.94	2438		27.0956	810	21.94	1369		33.88	246
27.1159	989	22.1159	1896	21.96	2496		27.1159	796	21.96	1424		33.92	251
27.1361	963	22.1361	1832	21.98	2462		27.1361	773	21.98	1381		33.96	245
27.1564	964	22.1564	1908	22	2459		27.1564	812	22	1455		34	268
27.1766	946	22.1766	1911	22.02	2435		27.1766	772	22.02	1426		34.04	264
27.1969	979	22.1969	1917	22.04	2480		27.1969	840	22.04	1420		34.08	248
27.2172	1011	22.2172	1880	22.06	2453		27.2172	808	22.06	1385		34.12	252
27.2374	1023	22.2374	2006	22.08	2405		27.2374	820	22.08	1428		34.16	255
27.2577	1034	22.2577	1914	22.1	2466		27.2577	864	22.1	1467		34.2	253
27.2779	1012	22.2779	1876	22.12	2396		27.2779	763	22.12	1394		34.24	229
27.2982	969	22.2982	1943	22.14	2487		27.2982	775	22.14	1437		34.28	238
27.3184	1016	22.3184	1943	22.16	2463		27.3184	787	22.16	1458		34.32	240
27.3387	1036	22.3387	1912	22.18	2494		27.3387	842	22.18	1438		34.36	264
27.359	1008	22.359	1905	22.2	2500		27.359	828	22.2	1414		34.4	251
27.3792	949	22.3792	1826	22.22	2522		27.3792	796	22.22	1404		34.44	269
27.3995	970	22.3995	1877	22.24	2435		27.3995	728	22.24	1446		34.48	236
27.4197	1027	22.4197	1884	22.26	2456		27.4197	815	22.26	1418		34.52	236
27.44	953	22.44	2008	22.28	2530		27.44	781	22.28	1426		34.56	231
27.4602	987	22.4602	1935	22.3	2438		27.4602	747	22.3	1448		34.6	244
27.4805	1020	22.4805	1918	22.32	2495		27.4805	740	22.32	1450		34.64	243
27.5008	1030	22.5008	1933	22.34	2500		27.5008	748	22.34	1481		34.68	252
27.521	1022	22.521	1996	22.36	2518		27.521	735	22.36	1394		34.72	208
27.5413	1026	22.5413	1882	22.38	2538		27.5413	756	22.38	1424		34.76	241
27.5615	1013	22.5615	2048	22.4	2518		27.5615	770	22.4	1501		34.8	238
27.5818	990	22.5818	1997	22.42	2522		27.5818	775	22.42	1475		34.84	218
27.602	961	22.602	1889	22.44	2558		27.602	781	22.44	1466		34.88	256
27.6223	983	22.6223	1961	22.46	2610		27.6223	785	22.46	1427		34.92	214
27.6426	957	22.6426	2011	22.48	2519		27.6426	780	22.48	1407		34.96	237
27.6628	1005	22.6628	1894	22.5	2538		27.6628	760	22.5	1504		35	197
27.6831	983	22.6831	1867	22.52	2445		27.6831	775	22.52	1464		35.04	234
27.7033	975	22.7033	1959	22.54	2564		27.7033	739	22.54	1477		35.08	207
27.7236	973	22.7236	1983	22.56	2559		27.7236	778	22.56	1439		35.12	233
27.7438	1041	22.7438	1971	22.58	2570		27.7438	740	22.58	1432		35.16	235
27.7641	1002	22.7641	2029	22.6	2582		27.7641	808	22.6	1440		35.2	216
27.7844	978	22.7844	1917	22.62	2542		27.7844	791	22.62	1498		35.24	211
27.8046	926	22.8046	1896	22.64	2442		27.8046	815	22.64	1445		35.28	222
27.8249	972	22.8249	1972	22.66	2550		27.8249	767	22.66	1483		35.32	223
27.8451	1059	22.8451	1952	22.68	2584		27.8451	747	22.68	1411		35.36	225
27.8654	978	22.8654	1946	22.7	2630		27.8654	809	22.7	1435		35.4	253
27.8856	965	22.8856	1948	22.72	2463		27.8856	746	22.72	1448		35.44	212
27.9059	988	22.9059	2005	22.74	2537		27.9059	754	22.74	1444		35.48	227
27.9262	1015	22.9262	1985	22.76	2481		27.9262	755	22.76	1489		35.52	197
27.9464	967	22.9464	1941	22.78	2610		27.9464	788	22.78	1453		35.56	231
27.9667	975	22.9667	1847	22.8	2473		27.9667	780	22.8	1453		35.6	226
27.9869	971	22.9869	1940	22.82	2567		27.9869	812	22.82	1462		35.64	225
28.0072	945	23.0072	1996	22.84	2561		28.0072	786	22.84	1520		35.68	199
28.0274	965	23.0274	2018	22.86	2543		28.0274	761	22.86	1484		35.72	223
28.0477	987	23.0477	2043	22.88	2611		28.0477	764	22.88	1477		35.76	198
28.068	953	23.068	1983	22.9	2532		28.068	802	22.9	1442		35.8	230
28.0882	970	23.0882	1910	22.92	2560		28.0882	785	22.92	1506		35.84	223
28.1085	994	23.1085	1922	22.94	2614		28.1085	777	22.94	1463		35.88	227
28.1287	932	23.1287	1962	22.96	2622		28.1287	817	22.96	1590		35.92	208
28.149	1041	23.149	1909	22.98	2573		28.149	778	22.98	1473		35.96	210
28.1692	960	23.1692	1972	23	2548		28.1692	815	23	1472		36	216
28.1895	956	23.1895	1998	23.02	2518		28.1895	789	23.02	1462		36.04	205
28.2098	1016	23.2098	1882	23.04	2622		28.2098	735	23.04	1474		36.08	231
28.23	1012	23.23	2001	23.06	2596		28.23	760	23.06	1507		36.12	213
28.2503	910	23.2503	1889	23.08	2624		28.2503	740	23.08	1493		36.16	221
28.2705	976	23.2705	1923	23.1	2599		28.2705	789	23.1	1441		36.2	229
28.2908	969	23.2908	1847	23.12	2562		28.2908	801	23.12	1434		36.24	181
28.311	997	23.311	1919	23.14	2607		28.311	729	23.14	1492		36.28	221
28.3313	922	23.3313	1988	23.16	2558		28.3313	762	23.16	1566		36.32	210
28.3516	1027	23.3516	1965	23.18	2646		28.3516	742	23.18	1462		36.36	242
28.3718	999	23.3718	1946	23.2	2586		28.3718	764	23.2	1484		36.4	224
28.3921	910	23.3921	2055	23.22	2570		28.3921	783	23.22	1477		36.44	267
28.4123	962	23.4123	1998	23.24	2609		28.4123	784	23.24	1470		36.48	239
28.4326	1001	23.4326	1965	23.26	2612		28.4326	766	23.26	1458		36.52	270
28.4528	969	23.4528	2079	23.28	2598		28.4528	802	23.28	1499		36.56	264
28.4731	964	23.4731	1977	23.3	2526		28.4731	752	23.3	1491		36.6	265
28.4934	989	23.4934	1996	23.32	2518		28.4934	730	23.32	1458		36.64	259
28.5136	928	23.5136	1950	23.34	2622		28.5136	798	23.34	1515		36.68	251
28.5339	936	23.5339	1992	23.36	2667		28.5339	780	23.36	1526		36.72	267
28.5541	917	23.5541	2036	23.38	2586		28.5541	810	23.38	1438		36.76	245
28.5744	927	23.5744	2017	23.4	2640		28.5744	819	23.4	1449		36.8	252
28.5946	985	23.5946	1971	23.42	2569		28.5946	779	23.42	1517		36.84	237
28.6149	911	23.6149	1962	23.44	2598		28.6149	772	23.44	1518		36.88	235
28.6352	991	23.6352	2065	23.46	2563		28.6352	779	23.46	1445		36.92	226
28.6554	951	23.6554	1951	23.48	2570		28.6554	742	23.48	1514		36.96	208
28.6757	973	23.6757	2010	23.5	2604		28.6757	776	23.5	1517		37	217
28.6959	997	23.6959	1897	23.52	2574		28.6959	773	23.52	1475		37.04	220
28.7162	960	23.7162	1998	23.54	2662		28.7162	754	23.54	1522		37.08	211
28.7364	963	23.7364	1896	23.56	2675		28.7364	771	23.56	1501		37.12	226
28.7567	963	23.7567	1962	23.58	2725		28.7567	774	23.58	1512		37.16	232
28.777	981	23.777	2036	23.6	2712		28.777	767	23.6	1525		37.2	263
28.7972	952	23.7972	1912	23.62	2633		28.7972	751	23.62	1464		37.24	288
28.8175	1013	23.8175	1905	23.64	2603		28.8175	782	23.64	1487		37.28	290
28.8377	967	23.8377	1973	23.66	2654		28.8377	814	23.66	1451		37.32	306
28.858	972	23.858	2051	23.68	2638		28.858	765	23.68	1478		37.36	332
28.8783	1037	23.8783	1924	23.7	2644		28.8783	744	23.7	1528		37.4	359
28.8985	946	23.8985	1926	23.72	2642		28.8985	774	23.72	1544		37.44	390
28.9188	1026	23.9188	1937	23.74	2536		28.9188	773	23.74	1540		37.48	372
28.939	1012	23.939	1970	23.76	2604		28.939	786	23.76	1521		37.52	373
28.9593	1001	23.9593	1970	23.78	2572		28.9593	765	23.78	1488		37.56	342
28.9795	987	23.9795	1968	23.8	2573		28.9795	775	23.8	1516		37.6	308
28.9998	940	23.9998	1987	23.82	2656		28.9998	735	23.82	1521		37.64	299
29.0201	863	24.0201	1985	23.84	2649		29.0201	818	23.84	1522		37.68	271
29.0403	941	24.0403	2010	23.86	2628		29.0403	748	23.86	1451		37.72	286
29.0606	949	24.0606	1960	23.88	2574		29.0606	720	23.88	1536		37.76	238
29.0808	978	24.0808	1924	23.9	2575		29.0808	770	23.9	1597		37.8	267
29.1011	1019	24.1011	1974	23.92	2569		29.1011	790	23.92	1526		37.84	220
29.1213	987	24.1213	1924	23.94	2676		29.1213	792	23.94	1501		37.88	237
29.1416	962	24.1416	2048	23.96	2569		29.1416	753	23.96	1443		37.92	296
29.1619	1036	24.1619	1974	23.98	2552		29.1619	788	23.98	1510		37.96	294
29.1821	1015	24.1821	2002	24	2654		29.1821	772	24	1532		38	323
29.2024	937	24.2024	1976	24.02	2624		29.2024	781	24.02	1465		38.04	367
29.2226	1018	24.2226	2023	24.04	2736		29.2226	733	24.04	1554		38.08	353
29.2429	958	24.2429	1870	24.06	2684		29.2429	755	24.06	1559		38.12	391
29.2631	960	24.2631	2017	24.08	2642		29.2631	801	24.08	1503		38.16	380
29.2834	1044	24.2834	1923	24.1	2645		29.2834	749	24.1	1494		38.2	342
29.3037	985	24.3037	1980	24.12	2648		29.3037	827	24.12	1516		38.24	384
29.3239	1020	24.3239	2005	24.14	2578		29.3239	768	24.14	1607		38.28	336
29.3442	950	24.3442	2011	24.16	2703		29.3442	777	24.16	1469		38.32	335
29.3644	1006	24.3644	2008	24.18	2683		29.3644	842	24.18	1518		38.36	301
29.3847	940	24.3847	1937	24.2	2697		29.3847	795	24.2	1571		38.4	274
29.4049	991	24.4049	1962	24.22	2679		29.4049	792	24.22	1538		38.44	239
29.4252	961	24.4252	2013	24.24	2609		29.4252	804	24.24	1478		38.48	200
29.4455	996	24.4455	1948	24.26	2644		29.4455	805	24.26	1554		38.52	206
29.4657	984	24.4657	1993	24.28	2700		29.4657	843	24.28	1550		38.56	184
29.486	1005	24.486	1967	24.3	2590		29.486	778	24.3	1526		38.6	208
29.5062	999	24.5062	1983	24.32	2697		29.5062	811	24.32	1562		38.64	183
29.5265	1070	24.5265	2048	24.34	2680		29.5265	773	24.34	1471		38.68	171
29.5467	994	24.5467	1887	24.36	2650		29.5467	790	24.36	1514		38.72	177
29.567	1066	24.567	2057	24.38	2748		29.567	773	24.38	1509		38.76	166
29.5873	1003	24.5873	1982	24.4	2684		29.5873	749	24.4	1531		38.8	165
29.6075	993	24.6075	1935	24.42	2728		29.6075	798	24.42	1477		38.84	160
29.6278	1018	24.6278	1988	24.44	2712		29.6278	858	24.44	1422		38.88	171
29.648	1049	24.648	1918	24.46	2737		29.648	810	24.46	1493		38.92	169
29.6683	1012	24.6683	1907	24.48	2628		29.6683	778	24.48	1537		38.96	157
29.6885	980	24.6885	2026	24.5	2630		29.6885	810	24.5	1609		39	150
29.7088	1027	24.7088	1939	24.52	2688		29.7088	834	24.52	1545		39.04	174
29.7291	1051	24.7291	2027	24.54	2738		29.7291	852	24.54	1547		39.08	169
29.7493	1058	24.7493	1960	24.56	2755		29.7493	850	24.56	1570		39.12	144
29.7696	1032	24.7696	2007	24.58	2658		29.7696	875	24.58	1461		39.16	174
29.7898	1094	24.7898	1975	24.6	2660		29.7898	869	24.6	1616		39.2	165
29.8101	1037	24.8101	1974	24.62	2678		29.8101	924	24.62	1548		39.24	146
29.8303	1134	24.8303	1934	24.64	2728		29.8303	858	24.64	1619		39.28	164
29.8506	1095	24.8506	1912	24.66	2644		29.8506	903	24.66	1536		39.32	154
29.8709	1148	24.8709	1957	24.68	2725		29.8709	922	24.68	1553		39.36	161
29.8911	1166	24.8911	1850	24.7	2812		29.8911	902	24.7	1551		39.4	152
29.9114	1124	24.9114	1915	24.72	2813		29.9114	918	24.72	1531		39.44	177
29.9316	1165	24.9316	1910	24.74	2717		29.9316	961	24.74	1527		39.48	172
29.9519	1208	24.9519	2017	24.76	2789		29.9519	1001	24.76	1605		39.52	153
29.9721	1285	24.9721	1973	24.78	2918		29.9721	1006	24.78	1570		39.56	151
29.9924	1322	24.9924	2005	24.8	2838		29.9924	1014	24.8	1546		39.6	156
30.0127	1282	25.0127	2071	24.82	2792		30.0127	1049	24.82	1630		39.64	158
30.0329	1417	25.0329	1947	24.84	2702		30.0329	1123	24.84	1610		39.68	157
30.0532	1463	25.0532	2008	24.86	2749		30.0532	1223	24.86	1614		39.72	147
30.0734	1665	25.0734	1972	24.88	2833		30.0734	1314	24.88	1610		39.76	143
30.0937	1747	25.0937	1992	24.9	2806		30.0937	1442	24.9	1634		39.8	137
30.1139	1886	25.1139	2008	24.92	2732		30.1139	1547	24.92	1571		39.84	160
30.1342	2261	25.1342	2028	24.94	2806		30.1342	1783	24.94	1618		39.88	159
30.1545	2510	25.1545	1858	24.96	2753		30.1545	2067	24.96	1609		39.92	148
30.1747	2635	25.1747	1956	24.98	2970		30.1747	2481	24.98	1729		39.96	151
30.195	2694	25.195	1988	25	2943		30.195	2983	25	1697		40	148
30.2152	2529	25.2152	1999	25.02	2938		30.2152	3388	25.02	1726		40.04	148
30.2355	2431	25.2355	2014	25.04	2985		30.2355	3461	25.04	1813		40.08	142
30.2557	2192	25.2557	1847	25.06	2999		30.2557	3177	25.06	1826		40.12	170
30.276	1977	25.276	1982	25.08	3022		30.276	2791	25.08	1834		40.16	163
30.2963	1653	25.2963	1940	25.1	3139		30.2963	2558	25.1	1851		40.2	157
30.3165	1572	25.3165	1929	25.12	3172		30.3165	2295	25.12	1887		40.24	144
30.3368	1389	25.3368	2051	25.14	3308		30.3368	1907	25.14	1949		40.28	154
30.357	1310	25.357	1939	25.16	3318		30.357	1602	25.16	2079		40.32	142
30.3773	1193	25.3773	1990	25.18	3468		30.3773	1369	25.18	2132		40.36	165
30.3975	1211	25.3975	1868	25.2	3610		30.3975	1248	25.2	2167		40.4	159
30.4178	1156	25.4178	1929	25.22	3753		30.4178	1105	25.22	2190		40.44	154
30.4381	1114	25.4381	1941	25.24	3812		30.4381	1095	25.24	2293		40.48	149
30.4583	1151	25.4583	1924	25.26	3836		30.4583	985	25.26	2413		40.52	155
30.4786	1102	25.4786	1881	25.28	4008		30.4786	1060	25.28	2341		40.56	159
30.4988	1099	25.4988	1979	25.3	4042		30.4988	960	25.3	2402		40.6	167
30.5191	1105	25.5191	1933	25.32	4052		30.5191	922	25.32	2377		40.64	142
30.5393	1130	25.5393	2007	25.34	3955		30.5393	946	25.34	2310		40.68	143
30.5596	1057	25.5596	1886	25.36	3903		30.5596	868	25.36	2293		40.72	134
30.5799	1025	25.5799	1988	25.38	3785		30.5799	873	25.38	2252		40.76	175
30.6001	1003	25.6001	2016	25.4	3718		30.6001	898	25.4	2191		40.8	178
30.6204	998	25.6204	2012	25.42	3607		30.6204	851	25.42	2191		40.84	160
30.6406	1079	25.6406	1911	25.44	3526		30.6406	864	25.44	2013		40.88	134
30.6609	1036	25.6609	1918	25.46	3518		30.6609	877	25.46	2045		40.92	149
30.6811	1099	25.6811	1966	25.48	3255		30.6811	846	25.48	1882		40.96	153
30.7014	1026	25.7014	1888	25.5	3216		30.7014	812	25.5	1825		41	148
30.7217	959	25.7217	1942	25.52	3124		30.7217	815	25.52	1773		41.04	158
30.7419	1021	25.7419	1933	25.54	3150		30.7419	830	25.54	1793		41.08	140
30.7622	969	25.7622	1921	25.56	3056		30.7622	782	25.56	1625		41.12	139
30.7824	1006	25.7824	1991	25.58	2992		30.7824	785	25.58	1711		41.16	139
30.8027	955	25.8027	1900	25.6	3053		30.8027	806	25.6	1697		41.2	130
30.8229	1054	25.8229	1951	25.62	2939		30.8229	795	25.62	1649		41.24	131
30.8432	1027	25.8432	1964	25.64	2876		30.8432	805	25.64	1589		41.28	121
30.8635	1041	25.8635	1904	25.66	2841		30.8635	779	25.66	1540		41.32	145
30.8837	1004	25.8837	1977	25.68	2769		30.8837	777	25.68	1591		41.36	133
30.904	967	25.904	1965	25.7	2771		30.904	759	25.7	1511		41.4	140
30.9242	1000	25.9242	1912	25.72	2766		30.9242	726	25.72	1555		41.44	127
30.9445	985	25.9445	1955	25.74	2710		30.9445	829	25.74	1622		41.48	155
30.9647	954	25.9647	1887	25.76	2649		30.9647	755	25.76	1554		41.52	134
30.985	968	25.985	1923	25.78	2720		30.985	743	25.78	1547		41.56	161
31.0053	1021	26.0053	1918	25.8	2658		31.0053	737	25.8	1561		41.6	148
31.0255	1053	26.0255	1870	25.82	2662		31.0255	741	25.82	1526		41.64	137
31.0458	1056	26.0458	1926	25.84	2664		31.0458	724	25.84	1493		41.68	146
31.066	1021	26.066	2038	25.86	2655		31.066	755	25.86	1466		41.72	145
31.0863	928	26.0863	1885	25.88	2633		31.0863	746	25.88	1472		41.76	125
31.1065	1028	26.1065	1939	25.9	2562		31.1065	761	25.9	1474		41.8	159
31.1268	1057	26.1268	1933	25.92	2590		31.1268	756	25.92	1428		41.84	143
31.1471	990	26.1471	2076	25.94	2650		31.1471	746	25.94	1501		41.88	160
31.1673	1015	26.1673	1918	25.96	2562		31.1673	726	25.96	1444		41.92	148
31.1876	1040	26.1876	1936	25.98	2540		31.1876	803	25.98	1468		41.96	125
31.2078	1036	26.2078	1851	26	2578		31.2078	745	26	1439		42	127
31.2281	1026	26.2281	1874	26.02	2663		31.2281	767	26.02	1410		42.04	141
31.2483	1039	26.2483	1814	26.04	2641		31.2483	697	26.04	1474		42.08	147
31.2686	1039	26.2686	1960	26.06	2595		31.2686	736	26.06	1493		42.12	129
31.2889	1007	26.2889	1885	26.08	2568		31.2889	743	26.08	1457		42.16	142
31.3091	1117	26.3091	1904	26.1	2474		31.3091	744	26.1	1457		42.2	144
31.3294	1043	26.3294	1918	26.12	2548		31.3294	727	26.12	1438		42.24	147
31.3496	1069	26.3496	1881	26.14	2518		31.3496	739	26.14	1454		42.28	137
31.3699	1075	26.3699	1841	26.16	2534		31.3699	771	26.16	1458		42.32	131
31.3901	1134	26.3901	1960	26.18	2553		31.3901	717	26.18	1489		42.36	137
31.4104	1081	26.4104	1926	26.2	2496		31.4104	742	26.2	1403		42.4	145
31.4307	1087	26.4307	1878	26.22	2572		31.4307	679	26.22	1441		42.44	143
31.4509	1073	26.4509	1882	26.24	2479		31.4509	733	26.24	1399		42.48	143
31.4712	1124	26.4712	1889	26.26	2493		31.4712	718	26.26	1409		42.52	158
31.4914	1102	26.4914	1966	26.28	2492		31.4914	756	26.28	1409		42.56	142
31.5117	1103	26.5117	1942	26.3	2545		31.5117	736	26.3	1468		42.6	149
31.5319	1215	26.5319	1848	26.32	2549		31.5319	727	26.32	1445		42.64	127
31.5522	1199	26.5522	1927	26.34	2569		31.5522	679	26.34	1407		42.68	142
31.5725	1150	26.5725	1872	26.36	2574		31.5725	682	26.36	1403		42.72	143
31.5927	1174	26.5927	1997	26.38	2533		31.5927	725	26.38	1413		42.76	127
31.613	1207	26.613	1822	26.4	2521		31.613	722	26.4	1442		42.8	137
31.6332	1169	26.6332	1903	26.42	2468		31.6332	736	26.42	1452		42.84	129
31.6535	1263	26.6535	1914	26.44	2554		31.6535	716	26.44	1458		42.88	153
31.6737	1268	26.6737	1852	26.46	2449		31.6737	719	26.46	1415		42.92	132
31.694	1314	26.694	1812	26.48	2497		31.694	712	26.48	1400		42.96	135
31.7143	1303	26.7143	1894	26.5	2537		31.7143	727	26.5	1388		43	162
31.7345	1370	26.7345	1854	26.52	2452		31.7345	648	26.52	1397		43.04	142
31.7548	1358	26.7548	1887	26.54	2454		31.7548	726	26.54	1427		43.08	134
31.775	1352	26.775	1938	26.56	2447		31.775	759	26.56	1398		43.12	138
31.7953	1411	26.7953	1776	26.58	2439		31.7953	728	26.58	1451		43.16	126
31.8155	1415	26.8155	1856	26.6	2474		31.8155	736	26.6	1335		43.2	137
31.8358	1410	26.8358	1849	26.62	2440		31.8358	686	26.62	1386		43.24	138
31.8561	1468	26.8561	1821	26.64	2425		31.8561	741	26.64	1445		43.28	127
31.8763	1508	26.8763	1870	26.66	2441		31.8763	707	26.66	1359		43.32	136
31.8966	1517	26.8966	1838	26.68	2483		31.8966	661	26.68	1383		43.36	126
31.9168	1566	26.9168	1931	26.7	2487		31.9168	713	26.7	1401		43.4	125
31.9371	1523	26.9371	1899	26.72	2466		31.9371	678	26.72	1364		43.44	122
31.9573	1559	26.9573	1811	26.74	2501		31.9573	688	26.74	1378		43.48	128
31.9776	1512	26.9776	1846	26.76	2572		31.9776	736	26.76	1365		43.52	146
31.9979	1546	26.9979	1853	26.78	2367		31.9979	728	26.78	1385		43.56	145
32.0181	1570	27.0181	1862	26.8	2355		32.0181	723	26.8	1351		43.6	134
32.0384	1494	27.0384	1875	26.82	2491		32.0384	689	26.82	1432		43.64	139
32.0586	1584	27.0586	1832	26.84	2376		32.0586	735	26.84	1425		43.68	137
32.0789	1536	27.0789	1788	26.86	2453		32.0789	736	26.86	1367		43.72	153
32.0991	1545	27.0991	1949	26.88	2444		32.0991	712	26.88	1397		43.76	121
32.1194	1502	27.1194	1772	26.9	2472		32.1194	732	26.9	1351		43.8	135
32.1397	1446	27.1397	1814	26.92	2384		32.1397	671	26.92	1305		43.84	133
32.1599	1469	27.1599	1863	26.94	2400		32.1599	710	26.94	1422		43.88	135
32.1802	1407	27.1802	1848	26.96	2368		32.1802	684	26.96	1318		43.92	126
32.2004	1380	27.2004	1836	26.98	2462		32.2004	687	26.98	1323		43.96	127
32.2207	1366	27.2207	1840	27	2540		32.2207	634	27	1277		44	130
32.241	1339	27.241	1887	27.02	2422		32.241	657	27.02	1362		44.04	119
32.2612	1295	27.2612	1830	27.04	2474		32.2612	737	27.04	1357		44.08	149
32.2815	1332	27.2815	1824	27.06	2437		32.2815	676	27.06	1387		44.12	132
32.3017	1208	27.3017	1889	27.08	2397		32.3017	697	27.08	1337		44.16	141
32.322	1289	27.322	1860	27.1	2422		32.322	636	27.1	1343		44.2	133
32.3422	1200	27.3422	1903	27.12	2452		32.3422	677	27.12	1333		44.24	134
32.3625	1135	27.3625	1796	27.14	2429		32.3625	681	27.14	1366		44.28	138
32.3828	1203	27.3828	1768	27.16	2384		32.3828	707	27.16	1381		44.32	131
32.403	1160	27.403	1814	27.18	2354		32.403	679	27.18	1298		44.36	138
32.4233	1119	27.4233	1827	27.2	2429		32.4233	689	27.2	1351		44.4	124
32.4435	1138	27.4435	1741	27.22	2382		32.4435	650	27.22	1322		44.44	148
32.4638	1060	27.4638	1807	27.24	2399		32.4638	681	27.24	1314		44.48	150
32.484	1111	27.484	1729	27.26	2361		32.484	706	27.26	1373		44.52	144
32.5043	970	27.5043	1793	27.28	2342		32.5043	722	27.28	1300		44.56	138
32.5246	1041	27.5246	1829	27.3	2340		32.5246	685	27.3	1369		44.6	130
32.5448	1020	27.5448	1816	27.32	2440		32.5448	697	27.32	1342		44.64	127
32.5651	1009	27.5651	1898	27.34	2388		32.5651	696	27.34	1393		44.68	128
32.5853	1009	27.5853	1861	27.36	2382		32.5853	666	27.36	1344		44.72	126
32.6056	1024	27.6056	1788	27.38	2446		32.6056	702	27.38	1311		44.76	119
32.6258	980	27.6258	1819	27.4	2412		32.6258	688	27.4	1330		44.8	128
32.6461	999	27.6461	1858	27.42	2423		32.6461	733	27.42	1337		44.84	123
32.6664	987	27.6664	1808	27.44	2367		32.6664	673	27.44	1352		44.88	114
32.6866	933	27.6866	1851	27.46	2386		32.6866	657	27.46	1369		44.92	119
32.7069	960	27.7069	1797	27.48	2352		32.7069	659	27.48	1289		44.96	108
32.7271	909	27.7271	1838	27.5	2374		32.7271	645	27.5	1309		45	154
32.7474	949	27.7474	1845	27.52	2376		32.7474	661	27.52	1323		45.04	114
32.7676	963	27.7676	1780	27.54	2360		32.7676	666	27.54	1340		45.08	142
32.7879	978	27.7879	1791	27.56	2374		32.7879	688	27.56	1308		45.12	99
32.8082	951	27.8082	1830	27.58	2350		32.8082	621	27.58	1371		45.16	138
32.8284	899	27.8284	1889	27.6	2323		32.8284	688	27.6	1370		45.2	132
32.8487	986	27.8487	1880	27.62	2329		32.8487	645	27.62	1313		45.24	131
32.8689	929	27.8689	1805	27.64	2276		32.8689	721	27.64	1334		45.28	130
32.8892	928	27.8892	1727	27.66	2366		32.8892	663	27.66	1318		45.32	115
32.9094	924	27.9094	1872	27.68	2346		32.9094	643	27.68	1363		45.36	115
32.9297	970	27.9297	1912	27.7	2328		32.9297	681	27.7	1337		45.4	126
32.95	903	27.95	1807	27.72	2343		32.95	679	27.72	1316		45.44	147
32.9702	897	27.9702	1771	27.74	2292		32.9702	704	27.74	1303		45.48	135
32.9905	860	27.9905	1862	27.76	2398		32.9905	660	27.76	1324		45.52	119
33.0107	901	28.0107	1769	27.78	2312		33.0107	649	27.78	1316		45.56	136
33.031	907	28.031	1825	27.8	2295		33.031	694	27.8	1223		45.6	108
33.0512	921	28.0512	1813	27.82	2297		33.0512	666	27.82	1332		45.64	142
33.0715	877	28.0715	1845	27.84	2295		33.0715	682	27.84	1262		45.68	135
33.0918	883	28.0918	1865	27.86	2305		33.0918	668	27.86	1341		45.72	124
33.112	914	28.112	1770	27.88	2318		33.112	682	27.88	1325		45.76	129
33.1323	898	28.1323	1786	27.9	2358		33.1323	670	27.9	1273		45.8	124
33.1525	852	28.1525	1751	27.92	2376		33.1525	669	27.92	1312		45.84	131
33.1728	904	28.1728	1774	27.94	2315		33.1728	645	27.94	1313		45.88	117
33.193	862	28.193	1836	27.96	2315		33.193	704	27.96	1278		45.92	126
33.2133	830	28.2133	1754	27.98	2360		33.2133	653	27.98	1296		45.96	98
33.2336	866	28.2336	1798	28	2296		33.2336	667	28	1286		46	134
33.2538	878	28.2538	1861	28.02	2286		33.2538	640	28.02	1300		46.04	131
33.2741	878	28.2741	1841	28.04	2227		33.2741	679	28.04	1265		46.08	127
33.2943	928	28.2943	1780	28.06	2331		33.2943	645	28.06	1318		46.12	139
33.3146	902	28.3146	1726	28.08	2373		33.3146	689	28.08	1349		46.16	135
33.3348	852	28.3348	1798	28.1	2295		33.3348	676	28.1	1327		46.2	125
33.3551	867	28.3551	1785	28.12	2268		33.3551	670	28.12	1297		46.24	112
33.3754	832	28.3754	1801	28.14	2350		33.3754	635	28.14	1331		46.28	145
33.3956	886	28.3956	1769	28.16	2237		33.3956	661	28.16	1264		46.32	128
33.4159	804	28.4159	1805	28.18	2255		33.4159	642	28.18	1270		46.36	143
33.4361	861	28.4361	1767	28.2	2337		33.4361	634	28.2	1298		46.4	143
33.4564	855	28.4564	1787	28.22	2267		33.4564	670	28.22	1289		46.44	137
33.4766	866	28.4766	1731	28.24	2311		33.4766	628	28.24	1190		46.48	123
33.4969	855	28.4969	1861	28.26	2228		33.4969	608	28.26	1303		46.52	124
33.5172	881	28.5172	1794	28.28	2245		33.5172	674	28.28	1317		46.56	144
33.5374	860	28.5374	1848	28.3	2326		33.5374	613	28.3	1346		46.6	132
33.5577	878	28.5577	1793	28.32	2258		33.5577	603	28.32	1282		46.64	126
33.5779	823	28.5779	1817	28.34	2266		33.5779	660	28.34	1264		46.68	128
33.5982	842	28.5982	1841	28.36	2220		33.5982	635	28.36	1262		46.72	105
33.6184	886	28.6184	1809	28.38	2250		33.6184	657	28.38	1308		46.76	141
33.6387	920	28.6387	1760	28.4	2349		33.6387	635	28.4	1250		46.8	145
33.659	833	28.659	1834	28.42	2281		33.659	679	28.42	1296		46.84	124
33.6792	783	28.6792	1744	28.44	2196		33.6792	652	28.44	1282		46.88	136
33.6995	802	28.6995	1759	28.46	2245		33.6995	638	28.46	1269		46.92	125
33.7197	886	28.7197	1794	28.48	2261		33.7197	650	28.48	1283		46.96	131
33.74	837	28.74	1937	28.5	2248		33.74	666	28.5	1308		47	123
33.7602	821	28.7602	1806	28.52	2291		33.7602	674	28.52	1251		47.04	138
33.7805	876	28.7805	1831	28.54	2330		33.7805	641	28.54	1295		47.08	139
33.8008	866	28.8008	1810	28.56	2282		33.8008	650	28.56	1272		47.12	169
33.821	838	28.821	1813	28.58	2256		33.821	610	28.58	1264		47.16	179
33.8413	825	28.8413	1756	28.6	2252		33.8413	665	28.6	1285		47.2	181
33.8615	865	28.8615	1784	28.62	2277		33.8615	641	28.62	1308		47.24	192
33.8818	849	28.8818	1828	28.64	2234		33.8818	607	28.64	1234		47.28	207
33.902	855	28.902	1815	28.66	2298		33.902	638	28.66	1261		47.32	262
33.9223	868	28.9223	1762	28.68	2231		33.9223	684	28.68	1223		47.36	304
33.9426	912	28.9426	1782	28.7	2246		33.9426	669	28.7	1256		47.4	325
33.9628	903	28.9628	1730	28.72	2259		33.9628	635	28.72	1190		47.44	377
33.9831	867	28.9831	1771	28.74	2304		33.9831	652	28.74	1231		47.48	428
34.0033	919	29.0033	1773	28.76	2273		34.0033	616	28.76	1274		47.52	401
34.0236	858	29.0236	1802	28.78	2191		34.0236	633	28.78	1260		47.56	431
34.0438	898	29.0438	1767	28.8	2185		34.0438	634	28.8	1288		47.6	534
34.0641	889	29.0641	1831	28.82	2280		34.0641	651	28.82	1289		47.64	455
34.0844	883	29.0844	1824	28.84	2265		34.0844	639	28.84	1253		47.68	419
34.1046	864	29.1046	1775	28.86	2323		34.1046	660	28.86	1265		47.72	406
34.1249	860	29.1249	1832	28.88	2247		34.1249	660	28.88	1236		47.76	352
34.1451	909	29.1451	1868	28.9	2247		34.1451	636	28.9	1239		47.8	307
34.1654	829	29.1654	1858	28.92	2306		34.1654	680	28.92	1259		47.84	270
34.1856	875	29.1856	1806	28.94	2287		34.1856	630	28.94	1214		47.88	238
34.2059	907	29.2059	1900	28.96	2217		34.2059	637	28.96	1245		47.92	214
34.2262	849	29.2262	1839	28.98	2273		34.2262	633	28.98	1257		47.96	173
34.2464	952	29.2464	1860	29	2223		34.2464	658	29	1249		48	141
34.2667	840	29.2667	1851	29.02	2291		34.2667	694	29.02	1223		48.04	152
34.2869	834	29.2869	1810	29.04	2160		34.2869	660	29.04	1206		48.08	162
34.3072	936	29.3072	1849	29.06	2244		34.3072	658	29.06	1210		48.12	129
34.3274	848	29.3274	1924	29.08	2160		34.3274	706	29.08	1261		48.16	138
34.3477	915	29.3477	1811	29.1	2216		34.3477	653	29.1	1203		48.2	136
34.368	926	29.368	1882	29.12	2229		34.368	701	29.12	1264		48.24	147
34.3882	904	29.3882	1859	29.14	2243		34.3882	617	29.14	1267		48.28	114
34.4085	884	29.4085	1824	29.16	2220		34.4085	653	29.16	1195		48.32	129
34.4287	895	29.4287	1832	29.18	2273		34.4287	630	29.18	1161		48.36	125
34.449	874	29.449	1833	29.2	2266		34.449	736	29.2	1241		48.4	120
34.4692	857	29.4692	1939	29.22	2227		34.4692	720	29.22	1223		48.44	128
34.4895	844	29.4895	1921	29.24	2211		34.4895	609	29.24	1240		48.48	123
34.5098	881	29.5098	2024	29.26	2225		34.5098	661	29.26	1217		48.52	130
34.53	917	29.53	2153	29.28	2220		34.53	691	29.28	1287		48.56	124
34.5503	869	29.5503	2054	29.3	2195		34.5503	690	29.3	1220		48.6	111
34.5705	903	29.5705	2229	29.32	2200		34.5705	672	29.32	1194		48.64	133
34.5908	904	29.5908	2203	29.34	2247		34.5908	696	29.34	1222		48.68	122
34.611	945	29.611	2331	29.36	2232		34.611	641	29.36	1287		48.72	124
34.6313	967	29.6313	2485	29.38	2139		34.6313	618	29.38	1197		48.76	114
34.6516	879	29.6516	2523	29.4	2233		34.6516	721	29.4	1233		48.8	112
34.6718	888	29.6718	2580	29.42	2182		34.6718	670	29.42	1225		48.84	123
34.6921	907	29.6921	2779	29.44	2168		34.6921	739	29.44	1179		48.88	118
34.7123	907	29.7123	2807	29.46	2244		34.7123	681	29.46	1216		48.92	125
34.7326	918	29.7326	2801	29.48	2273		34.7326	701	29.48	1264		48.96	123
34.7528	916	29.7528	3034	29.5	2203		34.7528	704	29.5	1253		49	104
34.7731	934	29.7731	3202	29.52	2196		34.7731	662	29.52	1178		49.04	124
34.7934	976	29.7934	3229	29.54	2126		34.7934	717	29.54	1260		49.08	113
34.8136	938	29.8136	3107	29.56	2179		34.8136	705	29.56	1253		49.12	114
34.8339	931	29.8339	2992	29.58	2220		34.8339	715	29.58	1228		49.16	110
34.8541	975	29.8541	3069	29.6	2226		34.8541	696	29.6	1261		49.2	122
34.8744	988	29.8744	3084	29.62	2283		34.8744	674	29.62	1243		49.24	122
34.8946	989	29.8946	2738	29.64	2102		34.8946	713	29.64	1164		49.28	108
34.9149	942	29.9149	2795	29.66	2093		34.9149	733	29.66	1234		49.32	117
34.9352	1012	29.9352	2563	29.68	2174		34.9352	729	29.68	1224		49.36	112
34.9554	979	29.9554	2577	29.7	2183		34.9554	783	29.7	1212		49.4	114
34.9757	981	29.9757	2429	29.72	2099		34.9757	748	29.72	1144		49.44	104
34.9959	995	29.9959	2273	29.74	2106		34.9959	813	29.74	1182		49.48	104
35.0162	995	30.0162	2173	29.76	2226		35.0162	812	29.76	1193		49.52	96
35.0364	1036	30.0364	2165	29.78	2163		35.0364	729	29.78	1220		49.56	107
35.0567	1053	30.0567	2035	29.8	2077		35.0567	801	29.8	1154		49.6	95
35.077	1039	30.077	1971	29.82	2082		35.077	783	29.82	1227		49.64	117
35.0972	1099	30.0972	2002	29.84	2143		35.0972	841	29.84	1243		49.68	123
35.1175	1077	30.1175	1836	29.86	2153		35.1175	871	29.86	1220		49.72	109
35.1377	1050	30.1377	1875	29.88	2083		35.1377	850	29.88	1193		49.76	98
35.158	1151	30.158	1841	29.9	2066		35.158	885	29.9	1178		49.8	99
35.1782	1089	30.1782	1849	29.92	2185		35.1782	897	29.92	1173		49.84	125
35.1985	1188	30.1985	1788	29.94	2164		35.1985	947	29.94	1233		49.88	125
35.2188	1206	30.2188	1815	29.96	2190		35.2188	932	29.96	1170		49.92	116
35.239	1269	30.239	1836	29.98	2119		35.239	970	29.98	1186		49.96	121
35.2593	1297	30.2593	1798	30	2108		35.2593	999	30	1190		50	103
35.2795	1287	30.2795	1759	30.02	2054		35.2795	1034	30.02	1156		50.04	97
35.2998	1424	30.2998	1746	30.04	2111		35.2998	1108	30.04	1197		50.08	103
35.32	1456	30.32	1755	30.06	2133		35.32	1189	30.06	1127		50.12	93
35.3403	1549	30.3403	1760	30.08	2167		35.3403	1200	30.08	1146		50.16	94
35.3606	1594	30.3606	1798	30.1	2156		35.3606	1236	30.1	1155		50.2	109
35.3808	1823	30.3808	1810	30.12	2104		35.3808	1384	30.12	1207		50.24	104
35.4011	1989	30.4011	1740	30.14	2064		35.4011	1570	30.14	1143		50.28	116
35.4213	2147	30.4213	1678	30.16	2129		35.4213	1729	30.16	1127		50.32	108
35.4416	2428	30.4416	1702	30.18	2158		35.4416	1860	30.18	1190		50.36	106
35.4618	2592	30.4618	1686	30.2	2092		35.4618	2225	30.2	1131		50.4	106
35.4821	2892	30.4821	1729	30.22	2137		35.4821	2445	30.22	1120		50.44	111
35.5024	2826	30.5024	1745	30.24	2125		35.5024	2714	30.24	1230		50.48	115
35.5226	2699	30.5226	1715	30.26	2136		35.5226	2889	30.26	1162		50.52	101
35.5429	2652	30.5429	1689	30.28	2069		35.5429	2907	30.28	1172		50.56	108
35.5631	2520	30.5631	1595	30.3	2118		35.5631	2652	30.3	1117		50.6	114
35.5834	2288	30.5834	1780	30.32	2100		35.5834	2565	30.32	1187		50.64	90
35.6036	2040	30.6036	1696	30.34	2125		35.6036	2437	30.34	1180		50.68	111
35.6239	1889	30.6239	1702	30.36	2074		35.6239	2223	30.36	1146		50.72	102
35.6442	1708	30.6442	1760	30.38	2114		35.6442	2028	30.38	1187		50.76	119
35.6644	1550	30.6644	1704	30.4	2093		35.6644	1722	30.4	1148		50.8	113
35.6847	1377	30.6847	1618	30.42	2062		35.6847	1611	30.42	1150		50.84	101
35.7049	1341	30.7049	1586	30.44	2111		35.7049	1397	30.44	1110		50.88	89
35.7252	1252	30.7252	1628	30.46	2026		35.7252	1260	30.46	1171		50.92	110
35.7455	1142	30.7455	1609	30.48	2065		35.7455	1192	30.48	1164		50.96	106
35.7657	1188	30.7657	1686	30.5	2093		35.7657	1082	30.5	1177		51	111
35.786	1088	30.786	1676	30.52	2014		35.786	1014	30.52	1172		51.04	113
35.8062	1071	30.8062	1682	30.54	2061		35.8062	1013	30.54	1208		51.08	87
35.8265	1048	30.8265	1663	30.56	2021		35.8265	969	30.56	1143		51.12	95
35.8467	1003	30.8467	1663	30.58	2047		35.8467	903	30.58	1139		51.16	100
35.867	1016	30.867	1609	30.6	2065		35.867	917	30.6	1130		51.2	104
35.8873	1003	30.8873	1613	30.62	2042		35.8873	868	30.62	1156		51.24	89
35.9075	949	30.9075	1646	30.64	2038		35.9075	844	30.64	1140		51.28	98
35.9278	1044	30.9278	1672	30.66	2074		35.9278	808	30.66	1042		51.32	122
35.948	1024	30.948	1639	30.68	2053		35.948	799	30.68	1144		51.36	102
35.9683	952	30.9683	1622	30.7	2075		35.9683	769	30.7	1204		51.4	115
35.9885	965	30.9885	1612	30.72	2049		35.9885	735	30.72	1160		51.44	104
36.0088	937	31.0088	1668	30.74	2046		36.0088	719	30.74	1099		51.48	103
36.0291	941	31.0291	1631	30.76	2027		36.0291	762	30.76	1110		51.52	88
36.0493	958	31.0493	1617	30.78	1998		36.0493	732	30.78	1064		51.56	87
36.0696	940	31.0696	1703	30.8	1969		36.0696	720	30.8	1140		51.6	89
36.0898	891	31.0898	1636	30.82	1997		36.0898	676	30.82	1120		51.64	104
36.1101	916	31.1101	1624	30.84	1968		36.1101	679	30.84	1163		51.68	112
36.1303	918	31.1303	1647	30.86	2067		36.1303	694	30.86	1176		51.72	96
36.1506	917	31.1506	1663	30.88	2038		36.1506	639	30.88	1103		51.76	97
36.1709	891	31.1709	1571	30.9	2036		36.1709	658	30.9	1159		51.8	108
36.1911	937	31.1911	1585	30.92	1984		36.1911	675	30.92	1147		51.84	104
36.2114	923	31.2114	1563	30.94	1949		36.2114	659	30.94	1112		51.88	125
36.2316	882	31.2316	1574	30.96	1990		36.2316	650	30.96	1086		51.92	114
36.2519	941	31.2519	1632	30.98	2093		36.2519	695	30.98	1193		51.96	101
36.2721	911	31.2721	1625	31	1994		36.2721	627	31	1141		52	93
36.2924	934	31.2924	1549	31.02	1969		36.2924	650	31.02	1092		52.04	107
36.3127	910	31.3127	1641	31.04	1970		36.3127	639	31.04	1137		52.08	100
36.3329	930	31.3329	1532	31.06	1963		36.3329	633	31.06	1075		52.12	110
36.3532	956	31.3532	1535	31.08	1963		36.3532	612	31.08	1096		52.16	92
36.3734	884	31.3734	1529	31.1	1958		36.3734	605	31.1	1165		52.2	122
36.3937	830	31.3937	1588	31.12	1997		36.3937	616	31.12	1099		52.24	89
36.4139	875	31.4139	1577	31.14	2053		36.4139	549	31.14	1124		52.28	109
36.4342	899	31.4342	1524	31.16	1900		36.4342	621	31.16	1125		52.32	120
36.4545	879	31.4545	1542	31.18	1908		36.4545	627	31.18	1114		52.36	88
36.4747	839	31.4747	1552	31.2	1940		36.4747	593	31.2	1103		52.4	98
36.495	909	31.495	1587	31.22	1942		36.495	626	31.22	1114		52.44	98
36.5152	892	31.5152	1659	31.24	1997		36.5152	559	31.24	1133		52.48	89
36.5355	860	31.5355	1618	31.26	1995		36.5355	598	31.26	1140		52.52	122
36.5557	893	31.5557	1575	31.28	2002		36.5557	576	31.28	1102		52.56	109
36.576	823	31.576	1634	31.3	1987		36.576	558	31.3	1107		52.6	106
36.5963	804	31.5963	1540	31.32	1980		36.5963	604	31.32	1115		52.64	100
36.6165	841	31.6165	1551	31.34	2047		36.6165	608	31.34	1097		52.68	102
36.6368	869	31.6368	1655	31.36	1975		36.6368	573	31.36	1111		52.72	117
36.657	817	31.657	1555	31.38	2019		36.657	546	31.38	1130		52.76	117
36.6773	830	31.6773	1542	31.4	1955		36.6773	628	31.4	1117		52.8	104
36.6975	869	31.6975	1558	31.42	1981		36.6975	548	31.42	1109		52.84	107
36.7178	835	31.7178	1554	31.44	1990		36.7178	590	31.44	1119		52.88	102
36.7381	829	31.7381	1557	31.46	1923		36.7381	610	31.46	1035		52.92	104
36.7583	792	31.7583	1472	31.48	1954		36.7583	571	31.48	985		52.96	114
36.7786	819	31.7786	1589	31.5	1919		36.7786	569	31.5	1092		53	126
36.7988	739	31.7988	1458	31.52	2031		36.7988	547	31.52	1055		53.04	108
36.8191	814	31.8191	1545	31.54	1983		36.8191	577	31.54	1097		53.08	115
36.8393	761	31.8393	1566	31.56	1881		36.8393	540	31.56	1096		53.12	123
36.8596	760	31.8596	1488	31.58	1959		36.8596	588	31.58	1109		53.16	111
36.8799	785	31.8799	1538	31.6	1927		36.8799	524	31.6	1167		53.2	146
36.9001	815	31.9001	1533	31.62	1901		36.9001	555	31.62	1056		53.24	168
36.9204	767	31.9204	1529	31.64	1962		36.9204	561	31.64	1054		53.28	166
36.9406	762	31.9406	1489	31.66	1987		36.9406	533	31.66	1082		53.32	199
36.9609	768	31.9609	1550	31.68	1824		36.9609	550	31.68	1062		53.36	222
36.9811	729	31.9811	1504	31.7	1920		36.9811	550	31.7	1077		53.4	198
37.0014	742	32.0014	1569	31.72	1939		37.0014	590	31.72	1041		53.44	242
37.0217	745	32.0217	1527	31.74	1865		37.0217	603	31.74	1068		53.48	237
37.0419	787	32.0419	1523	31.76	1913		37.0419	549	31.76	1119		53.52	246
37.0622	775	32.0622	1525	31.78	1946		37.0622	579	31.78	1045		53.56	217
37.0824	723	32.0824	1557	31.8	1937		37.0824	542	31.8	1085		53.6	224
37.1027	710	32.1027	1501	31.82	1863		37.1027	579	31.82	1065		53.64	204
37.1229	725	32.1229	1527	31.84	1872		37.1229	561	31.84	994		53.68	151
37.1432	672	32.1432	1514	31.86	1912		37.1432	518	31.86	1072		53.72	161
37.1635	705	32.1635	1588	31.88	1895		37.1635	518	31.88	1080		53.76	155
37.1837	681	32.1837	1547	31.9	1874		37.1837	549	31.9	1106		53.8	131
37.204	698	32.204	1497	31.92	1878		37.204	531	31.92	1059		53.84	142
37.2242	653	32.2242	1480	31.94	1837		37.2242	519	31.94	1036		53.88	139
37.2445	653	32.2445	1476	31.96	1818		37.2445	548	31.96	1065		53.92	143
37.2647	671	32.2647	1489	31.98	1897		37.2647	534	31.98	1037		53.96	130
37.285	631	32.285	1445	32	1885		37.285	496	32	1081		54	138
37.3053	684	32.3053	1508	32.02	1912		37.3053	491	32.02	1064		54.04	154
37.3255	634	32.3255	1489	32.04	1863		37.3255	504	32.04	1020		54.08	148
37.3458	663	32.3458	1451	32.06	1904		37.3458	492	32.06	1049		54.12	131
37.366	636	32.366	1463	32.08	1871		37.366	522	32.08	998		54.16	152
37.3863	673	32.3863	1440	32.1	1858		37.3863	511	32.1	995		54.2	200
37.4065	599	32.4065	1456	32.12	1839		37.4065	468	32.12	1060		54.24	207
37.4268	630	32.4268	1482	32.14	1848		37.4268	519	32.14	1033		54.28	217
37.4471	643	32.4471	1471	32.16	1794		37.4471	493	32.16	957		54.32	271
37.4673	617	32.4673	1499	32.18	1842		37.4673	474	32.18	979		54.36	357
37.4876	628	32.4876	1407	32.2	1848		37.4876	436	32.2	1023		54.4	387
37.5078	623	32.5078	1528	32.22	1790		37.5078	466	32.22	1001		54.44	391
37.5281	641	32.5281	1467	32.24	1819		37.5281	507	32.24	984		54.48	475
37.5483	609	32.5483	1451	32.26	1778		37.5483	508	32.26	1041		54.52	531
37.5686	624	32.5686	1470	32.28	1867		37.5686	476	32.28	1036		54.56	480
37.5889	593	32.5889	1484	32.3	1783		37.5889	494	32.3	1055		54.6	518
37.6091	598	32.6091	1441	32.32	1821		37.6091	456	32.32	1068		54.64	505
37.6294	622	32.6294	1512	32.34	1833		37.6294	472	32.34	989		54.68	471
37.6496	571	32.6496	1456	32.36	1793		37.6496	445	32.36	1043		54.72	418
37.6699	601	32.6699	1513	32.38	1800		37.6699	474	32.38	1019		54.76	388
37.6901	611	32.6901	1461	32.4	1819		37.6901	462	32.4	1064		54.8	309
37.7104	566	32.7104	1483	32.42	1767		37.7104	472	32.42	1000		54.84	271
37.7307	586	32.7307	1407	32.44	1799		37.7307	466	32.44	985		54.88	251
37.7509	603	32.7509	1505	32.46	1773		37.7509	470	32.46	1065		54.92	219
37.7712	579	32.7712	1397	32.48	1789		37.7712	457	32.48	968		54.96	208
37.7914	555	32.7914	1463	32.5	1868		37.7914	476	32.5	997		55	161
37.8117	534	32.8117	1407	32.52	1865		37.8117	436	32.52	986		55.04	151
37.8319	572	32.8319	1442	32.54	1844		37.8319	445	32.54	959		55.08	130
37.8522	539	32.8522	1426	32.56	1813		37.8522	453	32.56	1029		55.12	132
37.8725	589	32.8725	1434	32.58	1863		37.8725	467	32.58	970		55.16	117
37.8927	562	32.8927	1289	32.6	1771		37.8927	437	32.6	1009		55.2	113
37.913	567	32.913	1366	32.62	1854		37.913	431	32.62	989		55.24	110
37.9332	576	32.9332	1472	32.64	1793		37.9332	449	32.64	964		55.28	125
37.9535	562	32.9535	1394	32.66	1780		37.9535	433	32.66	946		55.32	115
37.9737	503	32.9737	1413	32.68	1742		37.9737	429	32.68	984		55.36	102
37.994	563	32.994	1422	32.7	1740		37.994	441	32.7	981		55.4	103
38.0143	540	33.0143	1421	32.72	1770		38.0143	437	32.72	984		55.44	117
38.0345	595	33.0345	1458	32.74	1779		38.0345	464	32.74	975		55.48	107
38.0548	569	33.0548	1412	32.76	1776		38.0548	431	32.76	1001		55.52	86
38.075	581	33.075	1399	32.78	1818		38.075	446	32.78	983		55.56	116
38.0953	541	33.0953	1404	32.8	1727		38.0953	483	32.8	1020		55.6	105
38.1155	508	33.1155	1438	32.82	1708		38.1155	473	32.82	970		55.64	83
38.1358	572	33.1358	1427	32.84	1716		38.1358	420	32.84	970		55.68	82
38.1561	528	33.1561	1403	32.86	1732		38.1561	450	32.86	936		55.72	89
38.1763	583	33.1763	1349	32.88	1661		38.1763	419	32.88	979		55.76	76
38.1966	575	33.1966	1355	32.9	1729		38.1966	402	32.9	968		55.8	106
38.2168	523	33.2168	1383	32.92	1753		38.2168	413	32.92	952		55.84	105
38.2371	551	33.2371	1436	32.94	1705		38.2371	429	32.94	983		55.88	79
38.2573	544	33.2573	1458	32.96	1738		38.2573	417	32.96	978		55.92	95
38.2776	527	33.2776	1319	32.98	1707		38.2776	416	32.98	964		55.96	95
38.2979	556	33.2979	1377	33	1734		38.2979	411	33	991		56	78
38.3181	528	33.3181	1364	33.02	1746		38.3181	421	33.02	972		56.04	97
38.3384	557	33.3384	1385	33.04	1668		38.3384	433	33.04	957		56.08	94
38.3586	549	33.3586	1398	33.06	1774		38.3586	415	33.06	1034		56.12	81
38.3789	561	33.3789	1413	33.08	1686		38.3789	417	33.08	953		56.16	90
38.3991	563	33.3991	1392	33.1	1694		38.3991	423	33.1	924		56.2	68
38.4194	497	33.4194	1415	33.12	1728		38.4194	422	33.12	957		56.24	80
38.4397	532	33.4397	1358	33.14	1683		38.4397	445	33.14	999		56.28	93
38.4599	540	33.4599	1375	33.16	1673		38.4599	391	33.16	911		56.32	73
38.4802	522	33.4802	1411	33.18	1699		38.4802	419	33.18	964		56.36	102
38.5004	568	33.5004	1363	33.2	1716		38.5004	438	33.2	965		56.4	80
38.5207	566	33.5207	1355	33.22	1699		38.5207	417	33.22	962		56.44	80
38.5409	515	33.5409	1366	33.24	1696		38.5409	432	33.24	960		56.48	108
38.5612	552	33.5612	1339	33.26	1649		38.5612	418	33.26	967		56.52	94
38.5815	503	33.5815	1393	33.28	1612		38.5815	432	33.28	944		56.56	97
38.6017	529	33.6017	1380	33.3	1601		38.6017	417	33.3	961		56.6	91
38.622	544	33.622	1370	33.32	1661		38.622	428	33.32	938		56.64	94
38.6422	515	33.6422	1316	33.34	1696		38.6422	410	33.34	972		56.68	106
38.6625	547	33.6625	1318	33.36	1704		38.6625	414	33.36	870		56.72	104
38.6827	458	33.6827	1355	33.38	1596		38.6827	374	33.38	933		56.76	87
38.703	522	33.703	1388	33.4	1649		38.703	413	33.4	927		56.8	71
38.7233	536	33.7233	1347	33.42	1647		38.7233	410	33.42	942		56.84	89
38.7435	529	33.7435	1295	33.44	1632		38.7435	386	33.44	923		56.88	100
38.7638	558	33.7638	1324	33.46	1744		38.7638	414	33.46	917		56.92	92
38.784	550	33.784	1305	33.48	1641		38.784	405	33.48	930		56.96	80
38.8043	486	33.8043	1309	33.5	1673		38.8043	411	33.5	890		57	90
38.8245	520	33.8245	1329	33.52	1652		38.8245	395	33.52	924		57.04	88
38.8448	538	33.8448	1319	33.54	1658		38.8448	389	33.54	895		57.08	67
38.8651	505	33.8651	1333	33.56	1613		38.8651	417	33.56	928		57.12	74
38.8853	524	33.8853	1285	33.58	1642		38.8853	376	33.58	917		57.16	73
38.9056	546	33.9056	1347	33.6	1627		38.9056	375	33.6	905		57.2	90
38.9258	548	33.9258	1348	33.62	1652		38.9258	407	33.62	861		57.24	80
38.9461	533	33.9461	1318	33.64	1695		38.9461	383	33.64	908		57.28	91
38.9663	499	33.9663	1388	33.66	1645		38.9663	392	33.66	922		57.32	91
38.9866	534	33.9866	1352	33.68	1668		38.9866	385	33.68	913		57.36	84
39.0069	542	34.0069	1395	33.7	1601		39.0069	432	33.7	880		57.4	91
39.0271	538	34.0271	1345	33.72	1576		39.0271	408	33.72	904		57.44	93
39.0474	508	34.0474	1436	33.74	1631		39.0474	386	33.74	930		57.48	91
39.0676	497	34.0676	1345	33.76	1632		39.0676	395	33.76	907		57.52	76
39.0879	526	34.0879	1369	33.78	1660		39.0879	398	33.78	895		57.56	83
39.1082	513	34.1082	1352	33.8	1649		39.1082	415	33.8	866		57.6	85
39.1284	528	34.1284	1284	33.82	1595		39.1284	447	33.82	860		57.64	88
39.1487	491	34.1487	1329	33.84	1618		39.1487	363	33.84	866		57.68	101
39.1689	520	34.1689	1299	33.86	1625		39.1689	420	33.86	861		57.72	75
39.1892	516	34.1892	1272	33.88	1593		39.1892	428	33.88	874		57.76	87
39.2094	495	34.2094	1297	33.9	1601		39.2094	373	33.9	827		57.8	85
39.2297	491	34.2297	1352	33.92	1570		39.2297	401	33.92	922		57.84	91
39.25	503	34.25	1342	33.94	1639		39.25	438	33.94	869		57.88	89
39.2702	522	34.2702	1341	33.96	1589		39.2702	396	33.96	903		57.92	91
39.2905	541	34.2905	1304	33.98	1583		39.2905	422	33.98	929		57.96	65
39.3107	543	34.3107	1366	34	1574		39.3107	376	34	924		58	79
39.331	499	34.331	1356	34.02	1554		39.331	419	34.02	932		58.04	86
39.3512	519	34.3512	1323	34.04	1522		39.3512	391	34.04	909		58.08	90
39.3715	498	34.3715	1308	34.06	1557		39.3715	407	34.06	876		58.12	99
39.3918	482	34.3918	1292	34.08	1616		39.3918	362	34.08	881		58.16	99
39.412	472	34.412	1340	34.1	1591		39.412	386	34.1	826		58.2	82
39.4323	519	34.4323	1322	34.12	1491		39.4323	400	34.12	884		58.24	84
39.4525	539	34.4525	1363	34.14	1517		39.4525	415	34.14	893		58.28	77
39.4728	478	34.4728	1327	34.16	1607		39.4728	402	34.16	850		58.32	95
39.493	491	34.493	1332	34.18	1514		39.493	414	34.18	901		58.36	96
39.5133	486	34.5133	1357	34.2	1603		39.5133	384	34.2	822		58.4	101
39.5336	526	34.5336	1286	34.22	1555		39.5336	398	34.22	855		58.44	83
39.5538	523	34.5538	1338	34.24	1575		39.5538	408	34.24	865		58.48	88
39.5741	469	34.5741	1387	34.26	1567		39.5741	394	34.26	867		58.52	93
39.5943	521	34.5943	1427	34.28	1518		39.5943	406	34.28	902		58.56	81
39.6146	506	34.6146	1391	34.3	1574		39.6146	417	34.3	902		58.6	85
39.6348	511	34.6348	1439	34.32	1509		39.6348	378	34.32	815		58.64	84
39.6551	518	34.6551	1347	34.34	1539		39.6551	400	34.34	824		58.68	89
39.6754	519	34.6754	1411	34.36	1510		39.6754	378	34.36	819		58.72	105
39.6956	502	34.6956	1417	34.38	1532		39.6956	398	34.38	866		58.76	90
39.7159	456	34.7159	1454	34.4	1544		39.7159	343	34.4	811		58.8	81
39.7361	522	34.7361	1458	34.42	1456		39.7361	408	34.42	879		58.84	91
39.7564	478	34.7564	1507	34.44	1472		39.7564	350	34.44	867		58.88	107
39.7766	480	34.7766	1534	34.46	1507		39.7766	399	34.46	857		58.92	84
39.7969	493	34.7969	1498	34.48	1547		39.7969	419	34.48	809		58.96	81
39.8172	489	34.8172	1552	34.5	1510		39.8172	381	34.5	805		59	83
39.8374	476	34.8374	1625	34.52	1460		39.8374	390	34.52	835		59.04	90
39.8577	462	34.8577	1678	34.54	1488		39.8577	382	34.54	841		59.08	79
39.8779	500	34.8779	1677	34.56	1494		39.8779	386	34.56	894		59.12	94
39.8982	523	34.8982	1845	34.58	1459		39.8982	417	34.58	871		59.16	85
39.9184	510	34.9184	1757	34.6	1515		39.9184	384	34.6	810		59.2	77
39.9387	480	34.9387	1981	34.62	1499		39.9387	400	34.62	801		59.24	68
39.959	481	34.959	2025	34.64	1458		39.959	360	34.64	836		59.28	67
39.9792	540	34.9792	2125	34.66	1478		39.9792	357	34.66	856		59.32	78
39.9995	498	34.9995	2388	34.68	1456		39.9995	384	34.68	788		59.36	100
40.0197	480	35.0197	2420	34.7	1436		40.0197	399	34.7	795		59.4	89
40.04	483	35.04	2542	34.72	1446		40.04	415	34.72	849		59.44	81
40.0602	485	35.0602	2549	34.74	1450		40.0602	389	34.74	849		59.48	86
40.0805	506	35.0805	2682	34.76	1513		40.0805	397	34.76	831		59.52	110
40.1008	453	35.1008	2733	34.78	1420		40.1008	407	34.78	825		59.56	86
40.121	493	35.121	2733	34.8	1443		40.121	407	34.8	857		59.6	106
40.1413	516	35.1413	2760	34.82	1423		40.1413	381	34.82	815		59.64	86
40.1615	484	35.1615	2845	34.84	1464		40.1615	408	34.84	857		59.68	82
40.1818	483	35.1818	2704	34.86	1424		40.1818	392	34.86	813		59.72	84
40.202	521	35.202	2558	34.88	1424		40.202	390	34.88	822		59.76	79
40.2223	482	35.2223	2584	34.9	1470		40.2223	387	34.9	843		59.8	95
40.2426	516	35.2426	2463	34.92	1412		40.2426	363	34.92	771		59.84	99
40.2628	470	35.2628	2405	34.94	1424		40.2628	384	34.94	787		59.88	86
40.2831	481	35.2831	2245	34.96	1427		40.2831	415	34.96	823		59.92	86
40.3033	455	35.3033	2094	34.98	1340		40.3033	377	34.98	794		59.96	95
40.3236	460	35.3236	1965	35	1405		40.3236	397	35	811		60	85
40.3438	487	35.3438	1824	35.02	1420		40.3438	383	35.02	773		60.04	80
40.3641	484	35.3641	1861	35.04	1412		40.3641	425	35.04	789		60.08	74
40.3844	481	35.3844	1711	35.06	1358		40.3844	361	35.06	768		60.12	78
40.4046	466	35.4046	1659	35.08	1471		40.4046	351	35.08	849		60.16	85
40.4249	506	35.4249	1518	35.1	1410		40.4249	411	35.1	779		60.2	99
40.4451	455	35.4451	1502	35.12	1432		40.4451	386	35.12	808		60.24	83
40.4654	487	35.4654	1496	35.14	1412		40.4654	387	35.14	793		60.28	82
40.4856	503	35.4856	1455	35.16	1407		40.4856	394	35.16	799		60.32	84
40.5059	498	35.5059	1354	35.18	1387		40.5059	385	35.18	767		60.36	84
40.5262	499	35.5262	1337	35.2	1389		40.5262	393	35.2	788		60.4	84
40.5464	501	35.5464	1344	35.22	1390		40.5464	386	35.22	771		60.44	83
40.5667	465	35.5667	1272	35.24	1402		40.5667	371	35.24	800		60.48	77
40.5869	456	35.5869	1244	35.26	1427		40.5869	411	35.26	753		60.52	85
40.6072	501	35.6072	1327	35.28	1371		40.6072	391	35.28	770		60.56	82
40.6274	484	35.6274	1259	35.3	1363		40.6274	396	35.3	743		60.6	88
40.6477	486	35.6477	1263	35.32	1340		40.6477	389	35.32	767		60.64	94
40.668	473	35.668	1277	35.34	1373		40.668	382	35.34	774		60.68	83
40.6882	461	35.6882	1215	35.36	1436		40.6882	357	35.36	814		60.72	84
40.7085	490	35.7085	1230	35.38	1362		40.7085	372	35.38	748		60.76	86
40.7287	441	35.7287	1233	35.4	1389		40.7287	347	35.4	751		60.8	83
40.749	476	35.749	1239	35.42	1389		40.749	383	35.42	791		60.84	83
40.7692	457	35.7692	1168	35.44	1368		40.7692	416	35.44	755		60.88	103
40.7895	490	35.7895	1164	35.46	1389		40.7895	388	35.46	778		60.92	76
40.8098	490	35.8098	1194	35.48	1371		40.8098	378	35.48	727		60.96	98
40.83	479	35.83	1135	35.5	1387		40.83	365	35.5	812		61	88
40.8503	453	35.8503	1184	35.52	1425		40.8503	352	35.52	775		61.04	86
40.8705	491	35.8705	1159	35.54	1335		40.8705	371	35.54	702		61.08	94
40.8908	455	35.8908	1178	35.56	1320		40.8908	407	35.56	714		61.12	86
40.911	489	35.911	1121	35.58	1345		40.911	403	35.58	696		61.16	63
40.9313	454	35.9313	1169	35.6	1372		40.9313	381	35.6	775		61.2	94
40.9516	463	35.9516	1159	35.62	1390		40.9516	390	35.62	718		61.24	104
40.9718	493	35.9718	1199	35.64	1349		40.9718	386	35.64	727		61.28	107
40.9921	482	35.9921	1140	35.66	1310		40.9921	344	35.66	748		61.32	91
41.0123	462	36.0123	1198	35.68	1380		41.0123	409	35.68	732		61.36	100
41.0326	477	36.0326	1162	35.7	1302		41.0326	407	35.7	769		61.4	130
41.0528	484	36.0528	1105	35.72	1377		41.0528	355	35.72	764		61.44	105
41.0731	470	36.0731	1169	35.74	1338		41.0731	377	35.74	732		61.48	117
41.0934	488	36.0934	1165	35.76	1353		41.0934	403	35.76	749		61.52	104
41.1136	474	36.1136	1082	35.78	1322		41.1136	355	35.78	729		61.56	114
41.1339	450	36.1339	1162	35.8	1321		41.1339	371	35.8	788		61.6	147
41.1541	505	36.1541	1172	35.82	1319		41.1541	393	35.82	787		61.64	111
41.1744	487	36.1744	1101	35.84	1302		41.1744	401	35.84	750		61.68	134
41.1946	463	36.1946	1180	35.86	1386		41.1946	372	35.86	724		61.72	123
41.2149	476	36.2149	1129	35.88	1305		41.2149	385	35.88	733		61.76	149
41.2352	480	36.2352	1101	35.9	1329		41.2352	382	35.9	801		61.8	144
41.2554	454	36.2554	1090	35.92	1267		41.2554	381	35.92	722		61.84	115
41.2757	469	36.2757	1075	35.94	1356		41.2757	373	35.94	762		61.88	146
41.2959	471	36.2959	1130	35.96	1276		41.2959	369	35.96	706		61.92	121
41.3162	451	36.3162	1059	35.98	1273		41.3162	345	35.98	753		61.96	133
41.3364	445	36.3364	1118	36	1292		41.3364	351	36	749		62	149
41.3567	444	36.3567	1060	36.02	1289		41.3567	359	36.02	732		62.04	168
41.377	527	36.377	1136	36.04	1352		41.377	341	36.04	721		62.08	151
41.3972	480	36.3972	1139	36.06	1265		41.3972	384	36.06	733		62.12	157
41.4175	441	36.4175	1072	36.08	1298		41.4175	385	36.08	760		62.16	149
41.4377	446	36.4377	1101	36.1	1364		41.4377	359	36.1	661		62.2	176
41.458	481	36.458	1128	36.12	1272		41.458	383	36.12	703		62.24	171
41.4782	450	36.4782	1109	36.14	1345		41.4782	395	36.14	710		62.28	182
41.4985	441	36.4985	1102	36.16	1332		41.4985	366	36.16	724		62.32	171
41.5188	470	36.5188	1162	36.18	1361		41.5188	359	36.18	730		62.36	172
41.539	503	36.539	1118	36.2	1292		41.539	373	36.2	710		62.4	145
41.5593	453	36.5593	1079	36.22	1256		41.5593	385	36.22	703		62.44	158
41.5795	446	36.5795	1126	36.24	1293		41.5795	373	36.24	748		62.48	144
41.5998	476	36.5998	1074	36.26	1300		41.5998	364	36.26	716		62.52	125
41.62	458	36.62	1112	36.28	1298		41.62	372	36.28	691		62.56	120
41.6403	474	36.6403	1142	36.3	1317		41.6403	389	36.3	699		62.6	125
41.6606	484	36.6606	1096	36.32	1233		41.6606	373	36.32	693		62.64	117
41.6808	457	36.6808	1139	36.34	1278		41.6808	378	36.34	740		62.68	83
41.7011	462	36.7011	1116	36.36	1288		41.7011	375	36.36	686		62.72	114
41.7213	465	36.7213	1118	36.38	1339		41.7213	358	36.38	722		62.76	96
41.7416	492	36.7416	1133	36.4	1260		41.7416	366	36.4	731		62.8	93
41.7618	485	36.7618	1097	36.42	1251		41.7618	361	36.42	709		62.84	80
41.7821	460	36.7821	1096	36.44	1205		41.7821	369	36.44	704		62.88	76
41.8024	462	36.8024	1108	36.46	1258		41.8024	336	36.46	687		62.92	108
41.8226	464	36.8226	1032	36.48	1242		41.8226	393	36.48	677		62.96	85
41.8429	484	36.8429	1089	36.5	1249		41.8429	380	36.5	672		63	91
41.8631	453	36.8631	1019	36.52	1285		41.8631	372	36.52	701		63.04	89
41.8834	465	36.8834	1037	36.54	1269		41.8834	376	36.54	713		63.08	91
41.9036	485	36.9036	1020	36.56	1209		41.9036	375	36.56	668		63.12	69
41.9239	455	36.9239	1020	36.58	1263		41.9239	332	36.58	722		63.16	77
41.9442	462	36.9442	1050	36.6	1192		41.9442	370	36.6	683		63.2	87
41.9644	466	36.9644	1038	36.62	1268		41.9644	387	36.62	715		63.24	81
41.9847	465	36.9847	1041	36.64	1237		41.9847	368	36.64	635		63.28	80
42.0049	461	37.0049	1008	36.66	1255		42.0049	378	36.66	666		63.32	71
42.0252	497	37.0252	984	36.68	1215		42.0252	379	36.68	691		63.36	85
42.0454	468	37.0454	1033	36.7	1248		42.0454	403	36.7	716		63.4	87
42.0657	451	37.0657	1008	36.72	1268		42.0657	406	36.72	656		63.44	88
42.086	442	37.086	992	36.74	1259		42.086	375	36.74	649		63.48	79
42.1062	457	37.1062	1002	36.76	1240		42.1062	350	36.76	678		63.52	83
42.1265	473	37.1265	942	36.78	1228		42.1265	370	36.78	663		63.56	68
42.1467	497	37.1467	1004	36.8	1277		42.1467	373	36.8	668		63.6	75
42.167	458	37.167	995	36.82	1233		42.167	360	36.82	653		63.64	72
42.1872	485	37.1872	979	36.84	1212		42.1872	373	36.84	664		63.68	89
42.2075	457	37.2075	946	36.86	1242		42.2075	371	36.86	677		63.72	91
42.2278	497	37.2278	961	36.88	1196		42.2278	359	36.88	683		63.76	91
42.248	467	37.248	1023	36.9	1235		42.248	370	36.9	679		63.8	89
42.2683	483	37.2683	1048	36.92	1188		42.2683	362	36.92	698		63.84	84
42.2885	451	37.2885	992	36.94	1192		42.2885	368	36.94	699		63.88	70
42.3088	487	37.3088	935	36.96	1199		42.3088	358	36.96	699		63.92	76
42.329	475	37.329	992	36.98	1241		42.329	367	36.98	719		63.96	75
42.3493	467	37.3493	967	37	1215		42.3493	373	37	717		64	89
42.3696	457	37.3696	958	37.02	1213		42.3696	370	37.02	719		64.04	96
42.3898	492	37.3898	945	37.04	1230		42.3898	382	37.04	664		64.08	92
42.4101	443	37.4101	916	37.06	1229		42.4101	363	37.06	661		64.12	70
42.4303	471	37.4303	961	37.08	1278		42.4303	378	37.08	675		64.16	83
42.4506	489	37.4506	921	37.1	1204		42.4506	374	37.1	708		64.2	75
42.4708	484	37.4708	1004	37.12	1273		42.4708	380	37.12	676		64.24	78
42.4911	476	37.4911	921	37.14	1203		42.4911	397	37.14	703		64.28	87
42.5114	459	37.5114	980	37.16	1279		42.5114	358	37.16	705		64.32	90
42.5316	467	37.5316	941	37.18	1127		42.5316	343	37.18	682		64.36	82
42.5519	518	37.5519	969	37.2	1229		42.5519	411	37.2	653		64.4	81
42.5721	495	37.5721	928	37.22	1207		42.5721	371	37.22	660		64.44	67
42.5924	497	37.5924	889	37.24	1175		42.5924	357	37.24	642		64.48	81
42.6127	482	37.6127	920	37.26	1214		42.6127	367	37.26	645		64.52	70
42.6329	449	37.6329	957	37.28	1164		42.6329	414	37.28	679		64.56	67
42.6532	466	37.6532	935	37.3	1238		42.6532	396	37.3	676		64.6	94
42.6734	488	37.6734	880	37.32	1151		42.6734	375	37.32	669		64.64	92
42.6937	494	37.6937	929	37.34	1209		42.6937	413	37.34	679		64.68	61
42.7139	486	37.7139	933	37.36	1186		42.7139	371	37.36	649		64.72	74
42.7342	529	37.7342	960	37.38	1182		42.7342	406	37.38	643		64.76	77
42.7545	478	37.7545	933	37.4	1147		42.7545	401	37.4	638		64.8	79
42.7747	482	37.7747	936	37.42	1185		42.7747	407	37.42	657		64.84	71
42.795	467	37.795	907	37.44	1103		42.795	352	37.44	657		64.88	94
42.8152	537	37.8152	968	37.46	1189		42.8152	413	37.46	663		64.92	87
42.8355	507	37.8355	975	37.48	1212		42.8355	372	37.48	662		64.96	80
42.8557	513	37.8557	923	37.5	1232		42.8557	407	37.5	627		65	87
42.876	519	37.876	952	37.52	1208		42.876	391	37.52	615		65.04	84
42.8963	514	37.8963	901	37.54	1173		42.8963	404	37.54	665		65.08	88
42.9165	489	37.9165	952	37.56	1167		42.9165	448	37.56	656		65.12	79
42.9368	547	37.9368	977	37.58	1203		42.9368	448	37.58	673		65.16	89
42.957	505	37.957	965	37.6	1129		42.957	475	37.6	666		65.2	89
42.9773	514	37.9773	864	37.62	1197		42.9773	462	37.62	677		65.24	73
42.9975	563	37.9975	906	37.64	1180		42.9975	457	37.64	667		65.28	80
43.0178	538	38.0178	882	37.66	1151		43.0178	500	37.66	639		65.32	78
43.0381	584	38.0381	900	37.68	1192		43.0381	492	37.68	629		65.36	80
43.0583	614	38.0583	874	37.7	1185		43.0583	507	37.7	640		65.4	80
43.0786	577	38.0786	940	37.72	1211		43.0786	507	37.72	694		65.44	80
43.0988	617	38.0988	881	37.74	1181		43.0988	541	37.74	649		65.48	70
43.1191	601	38.1191	909	37.76	1169		43.1191	532	37.76	664		65.52	75
43.1393	666	38.1393	956	37.78	1222		43.1393	541	37.78	640		65.56	78
43.1596	555	38.1596	893	37.8	1237		43.1596	549	37.8	631		65.6	75
43.1799	620	38.1799	920	37.82	1181		43.1799	536	37.82	652		65.64	66
43.2001	557	38.2001	853	37.84	1159		43.2001	524	37.84	640		65.68	61
43.2204	551	38.2204	897	37.86	1180		43.2204	511	37.86	663		65.72	77
43.2406	570	38.2406	886	37.88	1172		43.2406	553	37.88	665		65.76	66
43.2609	482	38.2609	996	37.9	1188		43.2609	488	37.9	630		65.8	87
43.2811	515	38.2811	852	37.92	1148		43.2811	457	37.92	616		65.84	79
43.3014	488	38.3014	845	37.94	1221		43.3014	460	37.94	674		65.88	77
43.3217	502	38.3217	887	37.96	1175		43.3217	430	37.96	643		65.92	77
43.3419	490	38.3419	898	37.98	1173		43.3419	446	37.98	645		65.96	76
43.3622	457	38.3622	898	38	1193		43.3622	383	38	649		66	80
43.3824	475	38.3824	927	38.02	1102		43.3824	425	38.02	615		66.04	100
43.4027	477	38.4027	901	38.04	1125		43.4027	380	38.04	654		66.08	66
43.4229	488	38.4229	837	38.06	1161		43.4229	430	38.06	614		66.12	69
43.4432	472	38.4432	912	38.08	1138		43.4432	397	38.08	618		66.16	68
43.4635	464	38.4635	954	38.1	1173		43.4635	388	38.1	631		66.2	67
43.4837	463	38.4837	943	38.12	1116		43.4837	384	38.12	646		66.24	66
43.504	450	38.504	882	38.14	1191		43.504	380	38.14	605		66.28	69
43.5242	509	38.5242	904	38.16	1193		43.5242	347	38.16	624		66.32	70
43.5445	457	38.5445	902	38.18	1131		43.5445	387	38.18	613		66.36	71
43.5647	469	38.5647	906	38.2	1119		43.5647	387	38.2	592		66.4	81
43.585	493	38.585	945	38.22	1067		43.585	369	38.22	652		66.44	79
43.6053	487	38.6053	876	38.24	1145		43.6053	339	38.24	670		66.48	70
43.6255	462	38.6255	901	38.26	1105		43.6255	374	38.26	658		66.52	70
43.6458	449	38.6458	885	38.28	1123		43.6458	368	38.28	641		66.56	62
43.666	475	38.666	893	38.3	1115		43.666	382	38.3	604		66.6	70
43.6863	492	38.6863	871	38.32	1135		43.6863	377	38.32	668		66.64	60
43.7065	498	38.7065	911	38.34	1134		43.7065	372	38.34	675		66.68	58
43.7268	460	38.7268	870	38.36	1167		43.7268	396	38.36	648		66.72	64
43.7471	436	38.7471	838	38.38	1093		43.7471	367	38.38	633		66.76	61
43.7673	434	38.7673	848	38.4	1167		43.7673	356	38.4	633		66.8	64
43.7876	402	38.7876	896	38.42	1103		43.7876	340	38.42	650		66.84	65
43.8078	424	38.8078	819	38.44	1170		43.8078	344	38.44	604		66.88	72
43.8281	428	38.8281	878	38.46	1103		43.8281	364	38.46	625		66.92	66
43.8483	443	38.8483	870	38.48	1114		43.8483	355	38.48	633		66.96	60
43.8686	470	38.8686	918	38.5	1151		43.8686	343	38.5	638		67	65
43.8889	461	38.8889	948	38.52	1121		43.8889	354	38.52	634		67.04	69
43.9091	434	38.9091	887	38.54	1118		43.9091	358	38.54	642		67.08	59
43.9294	439	38.9294	894	38.56	1218		43.9294	326	38.56	611		67.12	84
43.9496	442	38.9496	882	38.58	1142		43.9496	388	38.58	630		67.16	66
43.9699	451	38.9699	860	38.6	1126		43.9699	351	38.6	671		67.2	70
43.9901	480	38.9901	924	38.62	1114		43.9901	359	38.62	644		67.24	67
44.0104	430	39.0104	934	38.64	1119		44.0104	364	38.64	635		67.28	68
44.0307	434	39.0307	856	38.66	1090		44.0307	362	38.66	631		67.32	79
44.0509	443	39.0509	891	38.68	1079		44.0509	340	38.68	626		67.36	58
44.0712	445	39.0712	884	38.7	1112		44.0712	386	38.7	645		67.4	79
44.0914	451	39.0914	889	38.72	1118		44.0914	345	38.72	625		67.44	71
44.1117	449	39.1117	863	38.74	1116		44.1117	369	38.74	661		67.48	67
44.1319	409	39.1319	917	38.76	1119		44.1319	327	38.76	640		67.52	78
44.1522	444	39.1522	862	38.78	1080		44.1522	337	38.78	610		67.56	74
44.1725	451	39.1725	950	38.8	1076		44.1725	347	38.8	596		67.6	65
44.1927	433	39.1927	884	38.82	1047		44.1927	351	38.82	626		67.64	82
44.213	413	39.213	850	38.84	1141		44.213	366	38.84	596		67.68	76
44.2332	453	39.2332	868	38.86	1128		44.2332	345	38.86	594		67.72	60
44.2535	438	39.2535	836	38.88	1135		44.2535	332	38.88	559		67.76	90
44.2737	397	39.2737	902	38.9	1094		44.2737	362	38.9	564		67.8	66
44.294	475	39.294	852	38.92	1114		44.294	332	38.92	577		67.84	70
44.3143	443	39.3143	872	38.94	1052		44.3143	343	38.94	567		67.88	84
44.3345	412	39.3345	907	38.96	1108		44.3345	308	38.96	611		67.92	67
44.3548	437	39.3548	859	38.98	1101		44.3548	316	38.98	594		67.96	67
44.375	466	39.375	903	39	1125		44.375	338	39	602		68	62
44.3953	433	39.3953	875	39.02	1106		44.3953	363	39.02	561		68.04	71
44.4155	446	39.4155	926	39.04	1128		44.4155	358	39.04	612		68.08	92
44.4358	439	39.4358	855	39.06	1049		44.4358	375	39.06	594		68.12	74
44.4561	431	39.4561	870	39.08	1061		44.4561	347	39.08	570		68.16	98
44.4763	420	39.4763	927	39.1	1099		44.4763	326	39.1	596		68.2	75
44.4966	456	39.4966	821	39.12	1015		44.4966	317	39.12	572		68.24	91
44.5168	430	39.5168	853	39.14	1098		44.5168	354	39.14	620		68.28	75
44.5371	456	39.5371	906	39.16	1070		44.5371	361	39.16	604		68.32	95
44.5573	442	39.5573	915	39.18	1064		44.5573	328	39.18	562		68.36	72
44.5776	471	39.5776	858	39.2	1086		44.5776	370	39.2	576		68.4	105
44.5979	459	39.5979	871	39.22	1018		44.5979	368	39.22	591		68.44	80
44.6181	449	39.6181	912	39.24	1066		44.6181	328	39.24	577		68.48	89
44.6384	415	39.6384	816	39.26	1056		44.6384	308	39.26	566		68.52	72
44.6586	457	39.6586	900	39.28	1022		44.6586	332	39.28	581		68.56	91
44.6789	425	39.6789	879	39.3	1011		44.6789	360	39.3	614		68.6	102
44.6991	462	39.6991	875	39.32	1034		44.6991	360	39.32	599		68.64	86
44.7194	468	39.7194	840	39.34	1050		44.7194	344	39.34	598		68.68	110
44.7397	423	39.7397	867	39.36	1017		44.7397	310	39.36	586		68.72	65
44.7599	449	39.7599	871	39.38	995		44.7599	321	39.38	626		68.76	60
44.7802	411	39.7802	839	39.4	1021		44.7802	336	39.4	560		68.8	64
44.8004	443	39.8004	890	39.42	1019		44.8004	316	39.42	610		68.84	73
44.8207	431	39.8207	910	39.44	1035		44.8207	351	39.44	579		68.88	74
44.8409	428	39.8409	868	39.46	1048		44.8409	358	39.46	591		68.92	92
44.8612	464	39.8612	900	39.48	1052		44.8612	356	39.48	542		68.96	57
44.8815	438	39.8815	859	39.5	1102		44.8815	364	39.5	598		69	68
44.9017	408	39.9017	851	39.52	1057		44.9017	297	39.52	573		69.04	71
44.922	445	39.922	863	39.54	1072		44.922	385	39.54	610		69.08	77
44.9422	435	39.9422	883	39.56	1040		44.9422	315	39.56	564		69.12	74
44.9625	461	39.9625	872	39.58	1054		44.9625	333	39.58	563		69.16	73
44.9827	403	39.9827	893	39.6	1010		44.9827	337	39.6	555		69.2	72
45.003	450	40.003	874	39.62	1015		45.003	331	39.62	561		69.24	75
45.0233	418	40.0233	869	39.64	1039		45.0233	311	39.64	573		69.28	82
45.0435	446	40.0435	909	39.66	1040		45.0435	332	39.66	553		69.32	76
45.0638	418	40.0638	860	39.68	1042		45.0638	325	39.68	599		69.36	90
45.084	421	40.084	859	39.7	1018		45.084	321	39.7	595		69.4	84
45.1043	445	40.1043	832	39.72	1055		45.1043	345	39.72	604		69.44	85
45.1245	454	40.1245	842	39.74	1006		45.1245	327	39.74	590		69.48	81
45.1448	422	40.1448	816	39.76	1043		45.1448	336	39.76	569		69.52	104
45.1651	436	40.1651	860	39.78	1028		45.1651	309	39.78	606		69.56	91
45.1853	396	40.1853	860	39.8	1060		45.1853	325	39.8	546		69.6	82
45.2056	378	40.2056	829	39.82	1007		45.2056	340	39.82	569		69.64	102
45.2258	400	40.2258	832	39.84	1017		45.2258	321	39.84	522		69.68	92
45.2461	430	40.2461	820	39.86	1088		45.2461	347	39.86	581		69.72	96
45.2663	422	40.2663	905	39.88	1034		45.2663	349	39.88	551		69.76	103
45.2866	429	40.2866	883	39.9	1059		45.2866	325	39.9	569		69.8	95
45.3069	382	40.3069	852	39.92	1118		45.3069	303	39.92	585		69.84	97
45.3271	432	40.3271	873	39.94	1031		45.3271	346	39.94	610		69.88	97
45.3474	428	40.3474	862	39.96	1077		45.3474	323	39.96	581		69.92	88
45.3676	371	40.3676	816	39.98	1030		45.3676	356	39.98	547		69.96	84
45.3879	430	40.3879	850	40	1014		45.3879	333	40	590		70	87
45.4081	454	40.4081	856	40.02	1041		45.4081	328	40.02	578		70.04	86
45.4284	413	40.4284	862	40.04	980		45.4284	315	40.04	591		70.08	67
45.4487	393	40.4487	881	40.06	1008		45.4487	287	40.06	555		70.12	74
45.4689	368	40.4689	807	40.08	1031		45.4689	355	40.08	580		70.16	65
45.4892	418	40.4892	823	40.1	1036		45.4892	335	40.1	537		70.2	72
45.5094	426	40.5094	840	40.12	1046		45.5094	350	40.12	555		70.24	71
45.5297	426	40.5297	848	40.14	1019		45.5297	335	40.14	587		70.28	69
45.5499	406	40.5499	877	40.16	1013		45.5499	292	40.16	556		70.32	72
45.5702	399	40.5702	838	40.18	1081		45.5702	359	40.18	597		70.36	89
45.5905	417	40.5905	848	40.2	1069		45.5905	318	40.2	543		70.4	60
45.6107	434	40.6107	873	40.22	1060		45.6107	321	40.22	576		70.44	65
45.631	405	40.631	875	40.24	1003		45.631	316	40.24	606		70.48	58
45.6512	416	40.6512	871	40.26	1001		45.6512	340	40.26	601		70.52	55
45.6715	398	40.6715	807	40.28	1061		45.6715	344	40.28	567		70.56	66
45.6917	416	40.6917	892	40.3	1063		45.6917	329	40.3	522		70.6	63
45.712	420	40.712	883	40.32	981		45.712	342	40.32	575		70.64	63
45.7323	445	40.7323	885	40.34	1028		45.7323	318	40.34	562		70.68	73
45.7525	444	40.7525	847	40.36	1042		45.7525	319	40.36	574		70.72	66
45.7728	442	40.7728	901	40.38	1067		45.7728	312	40.38	589		70.76	74
45.793	390	40.793	890	40.4	1030		45.793	336	40.4	560		70.8	57
45.8133	415	40.8133	824	40.42	1003		45.8133	300	40.42	567		70.84	64
45.8335	402	40.8335	867	40.44	1050		45.8335	322	40.44	545		70.88	76
45.8538	493	40.8538	857	40.46	1040		45.8538	317	40.46	539		70.92	64
45.8741	410	40.8741	836	40.48	1017		45.8741	293	40.48	563		70.96	59
45.8943	436	40.8943	880	40.5	1006		45.8943	334	40.5	573		71	66
45.9146	409	40.9146	893	40.52	1004		45.9146	321	40.52	596		71.04	74
45.9348	425	40.9348	857	40.54	1072		45.9348	324	40.54	587		71.08	71
45.9551	441	40.9551	871	40.56	1008		45.9551	321	40.56	539		71.12	63
45.9754	394	40.9754	813	40.58	1025		45.9754	340	40.58	558		71.16	56
45.9956	386	40.9956	898	40.6	1048		45.9956	347	40.6	588		71.2	70
46.0159	424	41.0159	879	40.62	1020		46.0159	337	40.62	551		71.24	70
46.0361	433	41.0361	868	40.64	993		46.0361	321	40.64	606		71.28	64
46.0564	375	41.0564	903	40.66	1050		46.0564	325	40.66	560		71.32	56
46.0766	403	41.0766	830	40.68	1059		46.0766	348	40.68	564		71.36	65
46.0969	382	41.0969	840	40.7	1057		46.0969	344	40.7	587		71.4	76
46.1172	427	41.1172	850	40.72	1079		46.1172	326	40.72	558		71.44	72
46.1374	356	41.1374	803	40.74	1052		46.1374	287	40.74	556		71.48	50
46.1577	420	41.1577	875	40.76	1089		46.1577	353	40.76	607		71.52	52
46.1779	400	41.1779	843	40.78	1045		46.1779	330	40.78	586		71.56	59
46.1982	438	41.1982	888	40.8	1074		46.1982	356	40.8	616		71.6	84
46.2184	431	41.2184	838	40.82	1026		46.2184	334	40.82	551		71.64	67
46.2387	424	41.2387	901	40.84	1050		46.2387	318	40.84	610		71.68	67
46.259	403	41.259	828	40.86	1040		46.259	290	40.86	555		71.72	58
46.2792	433	41.2792	832	40.88	1028		46.2792	314	40.88	571		71.76	69
46.2995	402	41.2995	820	40.9	1010		46.2995	319	40.9	594		71.8	54
46.3197	403	41.3197	881	40.92	1009		46.3197	277	40.92	577		71.84	72
46.34	398	41.34	828	40.94	1034		46.34	324	40.94	596		71.88	67
46.3602	427	41.3602	872	40.96	1018		46.3602	319	40.96	600		71.92	57
46.3805	441	41.3805	874	40.98	1066		46.3805	308	40.98	574		71.96	61
46.4008	435	41.4008	824	41	1029		46.4008	279	41	582		72	57
46.421	429	41.421	834	41.02	1095		46.421	305	41.02	623		72.04	52
46.4413	426	41.4413	853	41.04	1063		46.4413	316	41.04	558		72.08	75
46.4615	409	41.4615	891	41.06	1018		46.4615	320	41.06	598		72.12	59
46.4818	433	41.4818	843	41.08	1044		46.4818	359	41.08	580		72.16	67
46.502	370	41.502	847	41.1	1045		46.502	332	41.1	597		72.2	62
46.5223	403	41.5223	837	41.12	1033		46.5223	321	41.12	577		72.24	71
46.5426	403	41.5426	782	41.14	1028		46.5426	340	41.14	566		72.28	62
46.5628	361	41.5628	827	41.16	1092		46.5628	317	41.16	564		72.32	69
46.5831	427	41.5831	872	41.18	1007		46.5831	299	41.18	548		72.36	65
46.6033	392	41.6033	865	41.2	1087		46.6033	347	41.2	574		72.4	64
46.6236	418	41.6236	884	41.22	1050		46.6236	351	41.22	575		72.44	72
46.6438	444	41.6438	886	41.24	1024		46.6438	314	41.24	565		72.48	74
46.6641	428	41.6641	904	41.26	1071		46.6641	309	41.26	573		72.52	62
46.6844	450	41.6844	857	41.28	1027		46.6844	295	41.28	582		72.56	77
46.7046	423	41.7046	828	41.3	1041		46.7046	300	41.3	567		72.6	77
46.7249	394	41.7249	831	41.32	1031		46.7249	330	41.32	552		72.64	54
46.7451	420	41.7451	833	41.34	1068		46.7451	316	41.34	614		72.68	66
46.7654	381	41.7654	846	41.36	1076		46.7654	288	41.36	588		72.72	66
46.7856	414	41.7856	855	41.38	1000		46.7856	321	41.38	587		72.76	66
46.8059	416	41.8059	860	41.4	1035		46.8059	293	41.4	554		72.8	70
46.8262	411	41.8262	837	41.42	1097		46.8262	293	41.42	584		72.84	71
46.8464	408	41.8464	867	41.44	1001		46.8464	308	41.44	589		72.88	67
46.8667	422	41.8667	837	41.46	1065		46.8667	299	41.46	588		72.92	71
46.8869	372	41.8869	814	41.48	1033		46.8869	318	41.48	571		72.96	52
46.9072	393	41.9072	803	41.5	1020		46.9072	323	41.5	555		73	61
46.9274	408	41.9274	825	41.52	1047		46.9274	304	41.52	590		73.04	48
46.9477	435	41.9477	830	41.54	1024		46.9477	326	41.54	545		73.08	65
46.968	430	41.968	831	41.56	1037		46.968	308	41.56	602		73.12	69
46.9882	415	41.9882	863	41.58	1059		46.9882	284	41.58	601		73.16	53
47.0085	390	42.0085	839	41.6	1100		47.0085	352	41.6	552		73.2	59
47.0287	429	42.0287	808	41.62	1007		47.0287	313	41.62	580		73.24	77
47.049	403	42.049	852	41.64	1037		47.049	291	41.64	600		73.28	65
47.0692	415	42.0692	825	41.66	1063		47.0692	350	41.66	588		73.32	61
47.0895	392	42.0895	892	41.68	1063		47.0895	312	41.68	584		73.36	64
47.1098	421	42.1098	780	41.7	1041		47.1098	327	41.7	548		73.4	65
47.13	358	42.13	880	41.72	1063		47.13	304	41.72	532		73.44	65
47.1503	430	42.1503	815	41.74	1106		47.1503	312	41.74	556		73.48	74
47.1705	439	42.1705	819	41.76	1046		47.1705	312	41.76	580		73.52	75
47.1908	412	42.1908	885	41.78	1044		47.1908	309	41.78	522		73.56	67
47.211	384	42.211	866	41.8	1015		47.211	292	41.8	563		73.6	65
47.2313	393	42.2313	839	41.82	1060		47.2313	311	41.82	554		73.64	66
47.2516	391	42.2516	830	41.84	1107		47.2516	290	41.84	613		73.68	70
47.2718	406	42.2718	820	41.86	1007		47.2718	308	41.86	602		73.72	74
47.2921	432	42.2921	852	41.88	981		47.2921	278	41.88	559		73.76	89
47.3123	416	42.3123	846	41.9	1028		47.3123	302	41.9	539		73.8	69
47.3326	383	42.3326	898	41.92	1001		47.3326	340	41.92	556		73.84	63
47.3528	455	42.3528	842	41.94	1014		47.3528	303	41.94	564		73.88	79
47.3731	396	42.3731	840	41.96	1035		47.3731	304	41.96	604		73.92	71
47.3934	387	42.3934	887	41.98	1041		47.3934	292	41.98	593		73.96	89
47.4136	379	42.4136	886	42	1087		47.4136	332	42	545		74	81
47.4339	414	42.4339	876	42.02	1053		47.4339	318	42.02	571		74.04	81
47.4541	393	42.4541	876	42.04	1062		47.4541	306	42.04	527		74.08	84
47.4744	436	42.4744	864	42.06	1070		47.4744	285	42.06	567		74.12	87
47.4946	404	42.4946	821	42.08	1000		47.4946	319	42.08	586		74.16	80
47.5149	435	42.5149	867	42.1	1041		47.5149	278	42.1	549		74.2	84
47.5352	390	42.5352	836	42.12	1044		47.5352	304	42.12	544		74.24	92
47.5554	409	42.5554	921	42.14	1037		47.5554	317	42.14	580		74.28	85
47.5757	433	42.5757	879	42.16	982		47.5757	315	42.16	588		74.32	103
47.5959	414	42.5959	863	42.18	1007		47.5959	292	42.18	586		74.36	96
47.6162	384	42.6162	790	42.2	1036		47.6162	307	42.2	574		74.4	120
47.6364	389	42.6364	839	42.22	1023		47.6364	299	42.22	543		74.44	115
47.6567	431	42.6567	876	42.24	1019		47.6567	336	42.24	569		74.48	120
47.677	436	42.677	908	42.26	1123		47.677	293	42.26	580		74.52	114
47.6972	397	42.6972	886	42.28	1061		47.6972	309	42.28	565		74.56	151
47.7175	419	42.7175	885	42.3	1029		47.7175	322	42.3	579		74.6	158
47.7377	444	42.7377	881	42.32	1011		47.7377	298	42.32	581		74.64	126
47.758	431	42.758	961	42.34	1055		47.758	283	42.34	604		74.68	132
47.7782	406	42.7782	910	42.36	1042		47.7782	331	42.36	598		74.72	130
47.7985	398	42.7985	879	42.38	1072		47.7985	310	42.38	535		74.76	130
47.8188	427	42.8188	885	42.4	1045		47.8188	307	42.4	644		74.8	130
47.839	418	42.839	877	42.42	1050		47.839	317	42.42	553		74.84	115
47.8593	436	42.8593	887	42.44	1092		47.8593	312	42.44	563		74.88	102
47.8795	428	42.8795	857	42.46	1052		47.8795	306	42.46	501		74.92	112
47.8998	401	42.8998	909	42.48	1030		47.8998	282	42.48	569		74.96	107
47.92	384	42.92	892	42.5	997		47.92	328	42.5	540		75	109
47.9403	429	42.9403	814	42.52	1006		47.9403	317	42.52	588		75.04	102
47.9606	403	42.9606	913	42.54	1057		47.9606	291	42.54	556		75.08	97
47.9808	434	42.9808	853	42.56	1011		47.9808	309	42.56	576		75.12	99
48.0011	402	43.0011	869	42.58	1045		48.0011	286	42.58	585		75.16	93
48.0213	384	43.0213	889	42.6	1037		48.0213	311	42.6	557		75.2	78
48.0416	389	43.0416	890	42.62	1052		48.0416	292	42.62	541		75.24	92
48.0618	414	43.0618	807	42.64	1095		48.0618	317	42.64	594		75.28	90
48.0821	389	43.0821	857	42.66	1041		48.0821	310	42.66	576		75.32	111
48.1024	414	43.1024	849	42.68	1071		48.1024	285	42.68	553		75.36	111
48.1226	413	43.1226	810	42.7	1088		48.1226	294	42.7	590		75.4	110
48.1429	374	43.1429	853	42.72	1001		48.1429	287	42.72	584		75.44	105
48.1631	397	43.1631	806	42.74	1044		48.1631	334	42.74	614		75.48	93
48.1834	376	43.1834	860	42.76	1074		48.1834	286	42.76	634		75.52	104
48.2036	354	43.2036	821	42.78	980		48.2036	264	42.78	549		75.56	87
48.2239	384	43.2239	849	42.8	1044		48.2239	287	42.8	558		75.6	105
48.2442	398	43.2442	876	42.82	1031		48.2442	267	42.82	551		75.64	118
48.2644	351	43.2644	849	42.84	998		48.2644	296	42.84	582		75.68	81
48.2847	412	43.2847	842	42.86	1037		48.2847	279	42.86	549		75.72	88
48.3049	383	43.3049	828	42.88	1006		48.3049	302	42.88	528		75.76	68
48.3252	430	43.3252	804	42.9	1084		48.3252	310	42.9	543		75.8	88
48.3454	375	43.3454	833	42.92	1010		48.3454	322	42.92	545		75.84	76
48.3657	383	43.3657	811	42.94	1027		48.3657	290	42.94	546		75.88	76
48.386	388	43.386	794	42.96	1053		48.386	299	42.96	582		75.92	73
48.4062	420	43.4062	828	42.98	1039		48.4062	295	42.98	558		75.96	84
48.4265	372	43.4265	821	43	963		48.4265	298	43	594		76	75
48.4467	402	43.4467	844	43.02	1093		48.4467	295	43.02	608		76.04	64
48.467	404	43.467	824	43.04	1059		48.467	288	43.04	583		76.08	72
48.4872	380	43.4872	837	43.06	1026		48.4872	278	43.06	576		76.12	69
48.5075	402	43.5075	825	43.08	1009		48.5075	286	43.08	568		76.16	59
48.5278	386	43.5278	821	43.1	1084		48.5278	297	43.1	538		76.2	72
48.548	368	43.548	835	43.12	1026		48.548	296	43.12	570		76.24	61
48.5683	410	43.5683	864	43.14	1054		48.5683	293	43.14	532		76.28	66
48.5885	397	43.5885	842	43.16	1030		48.5885	312	43.16	517		76.32	55
48.6088	388	43.6088	790	43.18	1021		48.6088	302	43.18	574		76.36	67
48.629	371	43.629	793	43.2	1023		48.629	302	43.2	555		76.4	48
48.6493	375	43.6493	823	43.22	1083		48.6493	294	43.22	571		76.44	52
48.6696	448	43.6696	839	43.24	961		48.6696	323	43.24	562		76.48	61
48.6898	388	43.6898	860	43.26	1077		48.6898	299	43.26	592		76.52	64
48.7101	386	43.7101	836	43.28	1062		48.7101	302	43.28	563		76.56	61
48.7303	379	43.7303	841	43.3	1046		48.7303	259	43.3	581		76.6	50
48.7506	378	43.7506	825	43.32	992		48.7506	277	43.32	602		76.64	68
48.7708	384	43.7708	810	43.34	1057		48.7708	270	43.34	579		76.68	61
48.7911	340	43.7911	865	43.36	1082		48.7911	295	43.36	598		76.72	70
48.8114	368	43.8114	855	43.38	1031		48.8114	299	43.38	546		76.76	48
48.8316	364	43.8316	831	43.4	980		48.8316	357	43.4	574		76.8	66
48.8519	382	43.8519	839	43.42	1036		48.8519	278	43.42	603		76.84	65
48.8721	383	43.8721	851	43.44	1048		48.8721	319	43.44	553		76.88	64
48.8924	381	43.8924	820	43.46	1004		48.8924	284	43.46	576		76.92	60
48.9126	382	43.9126	816	43.48	989		48.9126	294	43.48	614		76.96	58
48.9329	410	43.9329	809	43.5	998		48.9329	270	43.5	610		77	53
48.9532	381	43.9532	848	43.52	986		48.9532	267	43.52	560		77.04	56
48.9734	376	43.9734	760	43.54	1004		48.9734	277	43.54	558		77.08	70
48.9937	379	43.9937	802	43.56	1080		48.9937	300	43.56	550		77.12	71
49.0139	343	44.0139	827	43.58	1032		49.0139	285	43.58	545		77.16	71
49.0342	359	44.0342	838	43.6	1033		49.0342	283	43.6	549		77.2	58
49.0544	399	44.0544	842	43.62	1027		49.0544	293	43.62	551		77.24	56
49.0747	372	44.0747	792	43.64	1060		49.0747	282	43.64	554		77.28	59
49.095	380	44.095	865	43.66	1055		49.095	278	43.66	573		77.32	55
49.1152	372	44.1152	823	43.68	1017		49.1152	308	43.68	535		77.36	62
49.1355	395	44.1355	878	43.7	976		49.1355	286	43.7	545		77.4	57
49.1557	398	44.1557	803	43.72	1046		49.1557	292	43.72	559		77.44	62
49.176	394	44.176	816	43.74	1041		49.176	273	43.74	556		77.48	50
49.1962	368	44.1962	838	43.76	1035		49.1962	291	43.76	580		77.52	54
49.2165	373	44.2165	834	43.78	1003		49.2165	288	43.78	540		77.56	59
49.2368	399	44.2368	814	43.8	1044		49.2368	286	43.8	582		77.6	57
49.257	367	44.257	838	43.82	1052		49.257	275	43.82	558		77.64	51
49.2773	400	44.2773	819	43.84	989		49.2773	300	43.84	604		77.68	61
49.2975	396	44.2975	813	43.86	1013		49.2975	306	43.86	560		77.72	54
49.3178	357	44.3178	838	43.88	1051		49.3178	286	43.88	563		77.76	60
49.338	385	44.338	845	43.9	1001		49.338	284	43.9	562		77.8	62
49.3583	367	44.3583	801	43.92	1079		49.3583	318	43.92	596		77.84	62
49.3786	367	44.3786	784	43.94	1047		49.3786	299	43.94	584		77.88	55
49.3988	401	44.3988	816	43.96	1026		49.3988	261	43.96	565		77.92	59
49.4191	384	44.4191	806	43.98	1079		49.4191	284	43.98	599		77.96	57
49.4393	376	44.4393	832	44	1073		49.4393	268	44	588		78	54
49.4596	385	44.4596	869	44.02	996		49.4596	294	44.02	560		78.04	58
49.4799	354	44.4799	782	44.04	1012		49.4799	273	44.04	589		78.08	59
49.5001	362	44.5001	844	44.06	993		49.5001	291	44.06	614		78.12	50
49.5204	389	44.5204	843	44.08	978		49.5204	335	44.08	588		78.16	53
49.5406	367	44.5406	811	44.1	974		49.5406	295	44.1	564		78.2	65
49.5609	350	44.5609	829	44.12	1041		49.5609	305	44.12	565		78.24	69
49.5811	359	44.5811	782	44.14	987		49.5811	261	44.14	555		78.28	50
49.6014	391	44.6014	809	44.16	1077		49.6014	296	44.16	593		78.32	53
49.6217	368	44.6217	802	44.18	1042		49.6217	294	44.18	572		78.36	61
49.6419	368	44.6419	811	44.2	1065		49.6419	306	44.2	562		78.4	54
49.6622	367	44.6622	790	44.22	1060		49.6622	270	44.22	571		78.44	62
49.6824	382	44.6824	844	44.24	997		49.6824	280	44.24	522		78.48	55
49.7027	379	44.7027	883	44.26	982		49.7027	324	44.26	564		78.52	50
49.7229	365	44.7229	815	44.28	961		49.7229	318	44.28	554		78.56	64
49.7432	392	44.7432	821	44.3	993		49.7432	281	44.3	585		78.6	59
49.7635	361	44.7635	829	44.32	1010		49.7635	260	44.32	578		78.64	61
49.7837	386	44.7837	821	44.34	1060		49.7837	313	44.34	565		78.68	55
49.804	365	44.804	785	44.36	1043		49.804	300	44.36	567		78.72	50
49.8242	381	44.8242	802	44.38	1038		49.8242	285	44.38	509		78.76	63
49.8445	391	44.8445	831	44.4	975		49.8445	331	44.4	562		78.8	55
49.8647	341	44.8647	815	44.42	989		49.8647	282	44.42	562		78.84	73
49.885	359	44.885	837	44.44	1040		49.885	278	44.44	566		78.88	65
49.9053	382	44.9053	773	44.46	965		49.9053	298	44.46	548		78.92	52
49.9255	381	44.9255	797	44.48	996		49.9255	281	44.48	576		78.96	60
49.9458	413	44.9458	805	44.5	1000		49.9458	249	44.5	477		79	59
49.966	356	44.966	825	44.52	1024		49.966	268	44.52	545		79.04	58
49.9863	357	44.9863	819	44.54	1016		49.9863	247	44.54	540		79.08	62
50.0065	399	45.0065	842	44.56	1009		50.0065	321	44.56	551		79.12	64
50.0268	378	45.0268	804	44.58	976		50.0268	273	44.58	544		79.16	59
50.0471	377	45.0471	818	44.6	1017		50.0471	296	44.6	557		79.2	52
50.0673	377	45.0673	830	44.62	1033		50.0673	271	44.62	545		79.24	50
50.0876	335	45.0876	785	44.64	984		50.0876	259	44.64	584		79.28	53
50.1078	388	45.1078	845	44.66	1021		50.1078	296	44.66	528		79.32	53
50.1281	357	45.1281	754	44.68	987		50.1281	279	44.68	585		79.36	52
50.1483	381	45.1483	758	44.7	988		50.1483	267	44.7	565		79.4	45
50.1686	361	45.1686	760	44.72	948		50.1686	305	44.72	567		79.44	52
50.1889	356	45.1889	778	44.74	1010		50.1889	274	44.74	548		79.48	54
50.2091	357	45.2091	772	44.76	1034		50.2091	273	44.76	574		79.52	52
50.2294	366	45.2294	809	44.78	1008		50.2294	261	44.78	604		79.56	58
50.2496	367	45.2496	816	44.8	996		50.2496	277	44.8	563		79.6	61
50.2699	365	45.2699	843	44.82	1028		50.2699	281	44.82	574		79.64	62
50.2901	348	45.2901	754	44.84	953		50.2901	284	44.84	572		79.68	63
50.3104	397	45.3104	821	44.86	1049		50.3104	284	44.86	547		79.72	55
50.3307	328	45.3307	735	44.88	1051		50.3307	280	44.88	554		79.76	62
50.3509	361	45.3509	748	44.9	1006		50.3509	282	44.9	525		79.8	58
50.3712	389	45.3712	776	44.92	1022		50.3712	259	44.92	546		79.84	60
50.3914	328	45.3914	758	44.94	989		50.3914	286	44.94	550		79.88	47
50.4117	339	45.4117	791	44.96	967		50.4117	281	44.96	578		79.92	51
50.4319	357	45.4319	768	44.98	985		50.4319	278	44.98	543		79.96	56
50.4522	356	45.4522	778	45	998		50.4522	269	45	578		80	44
50.4725	323	45.4725	741	45.02	1009		50.4725	284	45.02	522
50.4927	383	45.4927	775	45.04	1033		50.4927	275	45.04	501
50.513	384	45.513	769	45.06	1017		50.513	290	45.06	518
50.5332	367	45.5332	814	45.08	1025		50.5332	283	45.08	576
50.5535	340	45.5535	711	45.1	983		50.5535	276	45.1	546
50.5737	369	45.5737	826	45.12	989		50.5737	245	45.12	579
50.594	371	45.594	794	45.14	1053		50.594	242	45.14	530
50.6143	349	45.6143	791	45.16	993		50.6143	278	45.16	539
50.6345	362	45.6345	751	45.18	993		50.6345	259	45.18	541
50.6548	337	45.6548	735	45.2	983		50.6548	234	45.2	542
50.675	344	45.675	783	45.22	1023		50.675	284	45.22	590
50.6953	363	45.6953	775	45.24	969		50.6953	281	45.24	536
50.7155	388	45.7155	790	45.26	965		50.7155	281	45.26	573
50.7358	333	45.7358	768	45.28	996		50.7358	289	45.28	563
50.7561	371	45.7561	804	45.3	993		50.7561	296	45.3	552
50.7763	380	45.7763	786	45.32	963		50.7763	288	45.32	572
50.7966	345	45.7966	754	45.34	958		50.7966	260	45.34	537
50.8168	332	45.8168	752	45.36	1004		50.8168	244	45.36	577
50.8371	317	45.8371	756	45.38	992		50.8371	287	45.38	553
50.8573	332	45.8573	764	45.4	1008		50.8573	280	45.4	576
50.8776	324	45.8776	780	45.42	954		50.8776	246	45.42	515
50.8979	364	45.8979	757	45.44	990		50.8979	312	45.44	573
50.9181	389	45.9181	750	45.46	1035		50.9181	236	45.46	540
50.9384	388	45.9384	772	45.48	996		50.9384	273	45.48	523
50.9586	360	45.9586	779	45.5	951		50.9586	284	45.5	540
50.9789	401	45.9789	788	45.52	942		50.9789	263	45.52	512
50.9991	356	45.9991	766	45.54	974		50.9991	269	45.54	541
51.0194	356	46.0194	819	45.56	979		51.0194	247	45.56	536
51.0397	380	46.0397	749	45.58	1041		51.0397	252	45.58	543
51.0599	335	46.0599	777	45.6	979		51.0599	242	45.6	515
51.0802	369	46.0802	713	45.62	971		51.0802	295	45.62	520
51.1004	377	46.1004	719	45.64	934		51.1004	281	45.64	536
51.1207	349	46.1207	783	45.66	965		51.1207	269	45.66	555
51.1409	342	46.1409	760	45.68	956		51.1409	242	45.68	530
51.1612	347	46.1612	767	45.7	966		51.1612	270	45.7	543
51.1815	343	46.1815	745	45.72	997		51.1815	293	45.72	570
51.2017	368	46.2017	761	45.74	982		51.2017	240	45.74	550
51.222	355	46.222	741	45.76	986		51.222	259	45.76	545
51.2422	342	46.2422	747	45.78	943		51.2422	259	45.78	548
51.2625	341	46.2625	741	45.8	1026		51.2625	263	45.8	507
51.2827	361	46.2827	763	45.82	966		51.2827	272	45.82	545
51.303	334	46.303	803	45.84	970		51.303	259	45.84	567
51.3233	345	46.3233	759	45.86	953		51.3233	274	45.86	517
51.3435	349	46.3435	831	45.88	976		51.3435	267	45.88	524
51.3638	362	46.3638	718	45.9	1012		51.3638	291	45.9	551
51.384	334	46.384	737	45.92	986		51.384	290	45.92	583
51.4043	344	46.4043	801	45.94	982		51.4043	269	45.94	564
51.4245	337	46.4245	759	45.96	1012		51.4245	295	45.96	549
51.4448	389	46.4448	724	45.98	898		51.4448	272	45.98	576
51.4651	350	46.4651	767	46	919		51.4651	306	46	533
51.4853	353	46.4853	758	46.02	917		51.4853	297	46.02	551
51.5056	370	46.5056	778	46.04	963		51.5056	252	46.04	498
51.5258	349	46.5258	729	46.06	985		51.5258	266	46.06	540
51.5461	384	46.5461	773	46.08	1000		51.5461	257	46.08	581
51.5663	352	46.5663	732	46.1	974		51.5663	279	46.1	514
51.5866	325	46.5866	753	46.12	887		51.5866	281	46.12	553
51.6069	325	46.6069	799	46.14	936		51.6069	258	46.14	542
51.6271	341	46.6271	713	46.16	953		51.6271	279	46.16	515
51.6474	313	46.6474	737	46.18	1010		51.6474	269	46.18	525
51.6676	348	46.6676	782	46.2	956		51.6676	273	46.2	533
51.6879	354	46.6879	716	46.22	970		51.6879	282	46.22	538
51.7081	337	46.7081	730	46.24	961		51.7081	271	46.24	531
51.7284	354	46.7284	738	46.26	926		51.7284	299	46.26	521
51.7487	364	46.7487	706	46.28	972		51.7487	283	46.28	522
51.7689	374	46.7689	703	46.3	969		51.7689	275	46.3	529
51.7892	370	46.7892	744	46.32	982		51.7892	297	46.32	562
51.8094	358	46.8094	745	46.34	950		51.8094	257	46.34	523
51.8297	344	46.8297	732	46.36	927		51.8297	279	46.36	530
51.8499	349	46.8499	723	46.38	907		51.8499	270	46.38	540
51.8702	363	46.8702	732	46.4	910		51.8702	262	46.4	550
51.8905	379	46.8905	732	46.42	970		51.8905	268	46.42	513
51.9107	370	46.9107	769	46.44	927		51.9107	267	46.44	536
51.931	341	46.931	759	46.46	904		51.931	281	46.46	532
51.9512	315	46.9512	700	46.48	915		51.9512	269	46.48	537
51.9715	335	46.9715	780	46.5	1048		51.9715	280	46.5	546
51.9917	378	46.9917	733	46.52	965		51.9917	234	46.52	527
52.012	336	47.012	723	46.54	1010		52.012	266	46.54	545
52.0323	353	47.0323	736	46.56	914		52.0323	287	46.56	495
52.0525	370	47.0525	766	46.58	955		52.0525	250	46.58	560
52.0728	340	47.0728	747	46.6	957		52.0728	272	46.6	548
52.093	365	47.093	718	46.62	973		52.093	265	46.62	493
52.1133	371	47.1133	736	46.64	958		52.1133	288	46.64	539
52.1335	351	47.1335	718	46.66	927		52.1335	270	46.66	566
52.1538	317	47.1538	689	46.68	942		52.1538	262	46.68	503
52.1741	329	47.1741	736	46.7	969		52.1741	292	46.7	521
52.1943	362	47.1943	739	46.72	939		52.1943	287	46.72	491
52.2146	352	47.2146	738	46.74	963		52.2146	293	46.74	558
52.2348	357	47.2348	765	46.76	975		52.2348	263	46.76	560
52.2551	347	47.2551	714	46.78	899		52.2551	273	46.78	569
52.2753	349	47.2753	747	46.8	960		52.2753	290	46.8	570
52.2956	347	47.2956	731	46.82	976		52.2956	286	46.82	525
52.3159	332	47.3159	739	46.84	958		52.3159	264	46.84	502
52.3361	344	47.3361	785	46.86	955		52.3361	273	46.86	575
52.3564	354	47.3564	721	46.88	914		52.3564	273	46.88	543
52.3766	319	47.3766	704	46.9	1034		52.3766	256	46.9	516
52.3969	342	47.3969	694	46.92	958		52.3969	244	46.92	516
52.4171	315	47.4171	742	46.94	962		52.4171	247	46.94	538
52.4374	362	47.4374	719	46.96	952		52.4374	274	46.96	516
52.4577	358	47.4577	788	46.98	964		52.4577	253	46.98	524
52.4779	342	47.4779	778	47	947		52.4779	260	47	510
52.4982	341	47.4982	689	47.02	1011		52.4982	278	47.02	527
52.5184	358	47.5184	743	47.04	937		52.5184	297	47.04	513
52.5387	326	47.5387	731	47.06	909		52.5387	264	47.06	541
52.5589	340	47.5589	739	47.08	967		52.5589	301	47.08	557
52.5792	342	47.5792	700	47.1	918		52.5792	309	47.1	557
52.5995	343	47.5995	722	47.12	944		52.5995	265	47.12	520
52.6197	395	47.6197	750	47.14	945		52.6197	312	47.14	559
52.64	343	47.64	705	47.16	948		52.64	283	47.16	532
52.6602	344	47.6602	737	47.18	895		52.6602	261	47.18	549
52.6805	322	47.6805	761	47.2	932		52.6805	254	47.2	520
52.7007	352	47.7007	706	47.22	973		52.7007	256	47.22	556
52.721	365	47.721	744	47.24	956		52.721	250	47.24	532
52.7413	384	47.7413	718	47.26	1011		52.7413	243	47.26	536
52.7615	365	47.7615	690	47.28	978		52.7615	268	47.28	532
52.7818	346	47.7818	733	47.3	1011		52.7818	268	47.3	538
52.802	363	47.802	736	47.32	971		52.802	258	47.32	529
52.8223	352	47.8223	703	47.34	964		52.8223	256	47.34	553
52.8426	368	47.8426	737	47.36	957		52.8426	270	47.36	556
52.8628	370	47.8628	737	47.38	951		52.8628	259	47.38	575
52.8831	375	47.8831	734	47.4	990		52.8831	316	47.4	557
52.9033	377	47.9033	677	47.42	991		52.9033	271	47.42	544
52.9236	355	47.9236	731	47.44	962		52.9236	258	47.44	576
52.9438	365	47.9438	752	47.46	966		52.9438	275	47.46	538
52.9641	398	47.9641	753	47.48	979		52.9641	264	47.48	536
52.9844	332	47.9844	733	47.5	955		52.9844	289	47.5	550
53.0046	376	48.0046	733	47.52	975		53.0046	265	47.52	550
53.0249	343	48.0249	724	47.54	956		53.0249	262	47.54	577
53.0451	372	48.0451	705	47.56	1004		53.0451	287	47.56	547
53.0654	364	48.0654	738	47.58	963		53.0654	277	47.58	513
53.0856	399	48.0856	749	47.6	965		53.0856	285	47.6	549
53.1059	427	48.1059	747	47.62	1064		53.1059	281	47.62	551
53.1262	365	48.1262	754	47.64	1025		53.1262	287	47.64	524
53.1464	355	48.1464	703	47.66	1006		53.1464	289	47.66	569
53.1667	382	48.1667	688	47.68	1020		53.1667	305	47.68	598
53.1869	396	48.1869	728	47.7	1026		53.1869	287	47.7	597
53.2072	414	48.2072	740	47.72	1046		53.2072	330	47.72	546
53.2274	421	48.2274	719	47.74	1049		53.2274	324	47.74	564
53.2477	439	48.2477	678	47.76	1041		53.2477	370	47.76	601
53.268	443	48.268	729	47.78	1142		53.268	339	47.78	651
53.2882	442	48.2882	721	47.8	1095		53.2882	344	47.8	616
53.3085	430	48.3085	683	47.82	1098		53.3085	348	47.82	620
53.3287	449	48.3287	748	47.84	1121		53.3287	378	47.84	591
53.349	474	48.349	694	47.86	1078		53.349	392	47.86	639
53.3692	458	48.3692	736	47.88	1128		53.3692	389	47.88	689
53.3895	461	48.3895	677	47.9	1131		53.3895	373	47.9	668
53.4098	437	48.4098	704	47.92	1178		53.4098	325	47.92	642
53.43	425	48.43	726	47.94	1273		53.43	337	47.94	675
53.4503	374	48.4503	753	47.96	1224		53.4503	377	47.96	690
53.4705	435	48.4705	685	47.98	1170		53.4705	365	47.98	678
53.4908	408	48.4908	669	48	1205		53.4908	363	48	707
53.511	406	48.511	714	48.02	1181		53.511	343	48.02	738
53.5313	397	48.5313	740	48.04	1179		53.5313	319	48.04	716
53.5516	383	48.5516	738	48.06	1213		53.5516	311	48.06	685
53.5718	356	48.5718	707	48.08	1255		53.5718	292	48.08	706
53.5921	368	48.5921	732	48.1	1271		53.5921	317	48.1	658
53.6123	388	48.6123	733	48.12	1258		53.6123	317	48.12	700
53.6326	385	48.6326	708	48.14	1284		53.6326	291	48.14	692
53.6528	349	48.6528	722	48.16	1261		53.6528	294	48.16	672
53.6731	395	48.6731	741	48.18	1187		53.6731	315	48.18	691
53.6934	350	48.6934	721	48.2	1151		53.6934	283	48.2	657
53.7136	344	48.7136	682	48.22	1154		53.7136	244	48.22	693
53.7339	309	48.7339	669	48.24	1152		53.7339	272	48.24	666
53.7541	397	48.7541	720	48.26	1134		53.7541	278	48.26	649
53.7744	371	48.7744	696	48.28	1163		53.7744	273	48.28	640
53.7946	368	48.7946	716	48.3	1041		53.7946	255	48.3	583
53.8149	352	48.8149	702	48.32	1050		53.8149	275	48.32	664
53.8352	362	48.8352	719	48.34	1093		53.8352	281	48.34	603
53.8554	349	48.8554	688	48.36	1110		53.8554	269	48.36	593
53.8757	334	48.8757	717	48.38	1040		53.8757	279	48.38	555
53.8959	352	48.8959	694	48.4	1089		53.8959	295	48.4	569
53.9162	346	48.9162	726	48.42	1017		53.9162	278	48.42	650
53.9364	349	48.9364	676	48.44	966		53.9364	292	48.44	587
53.9567	323	48.9567	697	48.46	996		53.9567	284	48.46	558
53.977	335	48.977	678	48.48	1000		53.977	283	48.48	617
53.9972	323	48.9972	712	48.5	975		53.9972	289	48.5	550
54.0175	381	49.0175	704	48.52	1009		54.0175	286	48.52	573
54.0377	349	49.0377	701	48.54	958		54.0377	260	48.54	528
54.058	345	49.058	712	48.56	936		54.058	294	48.56	551
54.0782	338	49.0782	766	48.58	957		54.0782	260	48.58	541
54.0985	298	49.0985	694	48.6	949		54.0985	244	48.6	535
54.1188	308	49.1188	690	48.62	1002		54.1188	238	48.62	560
54.139	368	49.139	703	48.64	900		54.139	259	48.64	524
54.1593	322	49.1593	742	48.66	897		54.1593	275	48.66	530
54.1795	353	49.1795	690	48.68	950		54.1795	260	48.68	550
54.1998	349	49.1998	695	48.7	936		54.1998	256	48.7	542
54.22	351	49.22	702	48.72	917		54.22	265	48.72	516
54.2403	324	49.2403	701	48.74	994		54.2403	275	48.74	520
54.2606	318	49.2606	683	48.76	940		54.2606	264	48.76	537
54.2808	363	49.2808	646	48.78	962		54.2808	240	48.78	559
54.3011	340	49.3011	767	48.8	952		54.3011	294	48.8	510
54.3213	361	49.3213	690	48.82	953		54.3213	275	48.82	521
54.3416	359	49.3416	636	48.84	900		54.3416	285	48.84	485
54.3618	324	49.3618	679	48.86	919		54.3618	291	48.86	510
54.3821	348	49.3821	714	48.88	913		54.3821	235	48.88	510
54.4024	344	49.4024	651	48.9	962		54.4024	263	48.9	505
54.4226	323	49.4226	674	48.92	907		54.4226	252	48.92	509
54.4429	362	49.4429	698	48.94	958		54.4429	286	48.94	537
54.4631	343	49.4631	698	48.96	973		54.4631	275	48.96	482
54.4834	384	49.4834	713	48.98	942		54.4834	276	48.98	529
54.5036	318	49.5036	671	49	876		54.5036	253	49	553
54.5239	360	49.5239	694	49.02	919		54.5239	274	49.02	544
54.5442	354	49.5442	711	49.04	928		54.5442	247	49.04	478
54.5644	327	49.5644	696	49.06	915		54.5644	254	49.06	481
54.5847	337	49.5847	700	49.08	932		54.5847	281	49.08	474
54.6049	341	49.6049	686	49.1	945		54.6049	242	49.1	499
54.6252	354	49.6252	691	49.12	917		54.6252	261	49.12	542
54.6454	348	49.6454	682	49.14	942		54.6454	255	49.14	476
54.6657	366	49.6657	672	49.16	899		54.6657	253	49.16	482
54.686	362	49.686	635	49.18	902		54.686	229	49.18	457
54.7062	335	49.7062	637	49.2	944		54.7062	267	49.2	497
54.7265	365	49.7265	674	49.22	923		54.7265	237	49.22	504
54.7467	367	49.7467	679	49.24	877		54.7467	220	49.24	534
54.767	385	49.767	729	49.26	890		54.767	241	49.26	514
54.7872	340	49.7872	717	49.28	904		54.7872	254	49.28	490
54.8075	344	49.8075	664	49.3	926		54.8075	273	49.3	509
54.8278	359	49.8278	655	49.32	932		54.8278	261	49.32	501
54.848	333	49.848	719	49.34	897		54.848	251	49.34	491
54.8683	378	49.8683	712	49.36	910		54.8683	246	49.36	528
54.8885	361	49.8885	744	49.38	891		54.8885	258	49.38	549
54.9088	363	49.9088	658	49.4	960		54.9088	239	49.4	495
54.929	345	49.929	692	49.42	946		54.929	256	49.42	515
54.9493	353	49.9493	721	49.44	909		54.9493	273	49.44	519
54.9696	356	49.9696	669	49.46	919		54.9696	245	49.46	507
54.9898	352	49.9898	695	49.48	921		54.9898	245	49.48	426
55.0101	343	50.0101	675	49.5	868		55.0101	232	49.5	491
55.0303	358	50.0303	729	49.52	919		55.0303	247	49.52	503
55.0506	335	50.0506	674	49.54	912		55.0506	289	49.54	455
55.0708	365	50.0708	700	49.56	933		55.0708	257	49.56	461
55.0911	342	50.0911	675	49.58	892		55.0911	270	49.58	499
55.1114	363	50.1114	682	49.6	904		55.1114	234	49.6	496
55.1316	357	50.1316	657	49.62	861		55.1316	260	49.62	489
55.1519	345	50.1519	672	49.64	864		55.1519	261	49.64	541
55.1721	331	50.1721	699	49.66	851		55.1721	264	49.66	511
55.1924	356	50.1924	707	49.68	828		55.1924	284	49.68	466
55.2126	334	50.2126	655	49.7	879		55.2126	261	49.7	513
55.2329	386	50.2329	644	49.72	910		55.2329	270	49.72	496
55.2532	341	50.2532	689	49.74	877		55.2532	263	49.74	477
55.2734	374	50.2734	635	49.76	904		55.2734	273	49.76	476
55.2937	358	50.2937	683	49.78	927		55.2937	277	49.78	487
55.3139	356	50.3139	676	49.8	863		55.3139	270	49.8	480
55.3342	404	50.3342	649	49.82	868		55.3342	265	49.82	462
55.3544	348	50.3544	730	49.84	882		55.3544	259	49.84	475
55.3747	359	50.3747	704	49.86	849		55.3747	260	49.86	513
55.395	359	50.395	664	49.88	853		55.395	253	49.88	490
55.4152	404	50.4152	654	49.9	873		55.4152	268	49.9	455
55.4355	371	50.4355	642	49.92	940		55.4355	260	49.92	481
[truncated: 1,213 more rows]

## Sheet: Section B Raw DCIP
Spectra of DCIP dye at 30 min intervals of UV irradiation / spectra are in Absorbance Units
HP-TiO2			Time / mins						P-TiO2			Time / mins						D-TiO2			Time / mins						Uncoated			Time / mins
nm	0	30	60	90	120	150	180		nm	0	30	60	90	120	150	180		nm	0	30	60	90	120	150	180		nm	t0	t1	t2	t3	t4	t5	t6
800	0.063015	0.069305	0.063319	0.065139	0.06397	0.064133	0.068306		800	0.065599	0.065168	0.065182	0.065639	0.064985	0.065476	0.065912		800	0.063167	0.0622	0.066613	0.06708	0.069844	0.069741	0.070053		800	0.063009	0.065399	0.065107	0.06502	0.065952	0.066278	0.067002
798	0.063927	0.069086	0.065619	0.065786	0.066554	0.067019	0.070938		798	0.063853	0.063812	0.063872	0.063851	0.064469	0.065088	0.066137		798	0.064036	0.06469	0.067154	0.069114	0.071136	0.071832	0.072384		798	0.064294	0.066757	0.066797	0.066613	0.067834	0.068463	0.068915
796	0.063451	0.069332	0.065632	0.067015	0.066031	0.065942	0.069186		796	0.065797	0.066746	0.06713	0.066805	0.066289	0.067837	0.068098		796	0.065192	0.064337	0.067569	0.070536	0.07251	0.072583	0.072616		796	0.064044	0.066962	0.067105	0.06819	0.068341	0.068716	0.06888
794	0.065262	0.07111	0.066964	0.06781	0.066213	0.067102	0.070952		794	0.06551	0.06608	0.065978	0.065259	0.06553	0.066549	0.067608		794	0.066112	0.066114	0.069269	0.070685	0.072671	0.074188	0.073223		794	0.065999	0.067488	0.06836	0.06783	0.068587	0.06964	0.070273
792	0.06427	0.06981	0.064968	0.06639	0.06636	0.06677	0.071298		792	0.06663	0.066125	0.066842	0.065939	0.06618	0.066369	0.068481		792	0.065714	0.06518	0.068261	0.070301	0.072754	0.073337	0.072913		792	0.06432	0.06761	0.066669	0.06774	0.067967	0.06847	0.069795
790	0.065874	0.07202	0.066972	0.069245	0.067916	0.06704	0.071263		790	0.066659	0.067255	0.066605	0.067128	0.066925	0.068058	0.068749		790	0.066122	0.066179	0.06856	0.071645	0.073936	0.074452	0.074067		790	0.065793	0.069188	0.06797	0.068772	0.06976	0.070431	0.070707
788	0.066503	0.0723	0.067888	0.067808	0.068802	0.068553	0.073255		788	0.067216	0.067016	0.067434	0.068478	0.068192	0.068391	0.069969		788	0.068273	0.067758	0.069828	0.071959	0.074234	0.074752	0.07542		788	0.06689	0.070023	0.069461	0.069841	0.069494	0.071643	0.071466
786	0.067171	0.071735	0.067282	0.068127	0.068159	0.068088	0.072925		786	0.068288	0.068326	0.068545	0.068584	0.068134	0.068852	0.069861		786	0.068159	0.066004	0.070403	0.072176	0.074343	0.074386	0.074812		786	0.066813	0.069517	0.069656	0.069398	0.06957	0.070148	0.072236
784	0.067241	0.072347	0.067534	0.068455	0.068111	0.06865	0.073281		784	0.069089	0.068845	0.068919	0.068751	0.069333	0.070141	0.070111		784	0.067993	0.068133	0.070644	0.073175	0.074308	0.075487	0.075209		784	0.067342	0.07038	0.070161	0.07025	0.071267	0.071378	0.072096
782	0.067641	0.073612	0.069416	0.069949	0.069734	0.070094	0.073848		782	0.068937	0.068726	0.069634	0.069977	0.07038	0.070379	0.070862		782	0.069159	0.068251	0.070801	0.073132	0.076609	0.076806	0.076298		782	0.068894	0.071051	0.069983	0.072011	0.07104	0.073546	0.073311
780	0.069206	0.074179	0.069682	0.070225	0.070165	0.070399	0.074142		780	0.070398	0.071067	0.070925	0.070447	0.070568	0.07125	0.071959		780	0.069519	0.068765	0.073171	0.074622	0.07655	0.077312	0.077055		780	0.068452	0.072665	0.071731	0.072972	0.072189	0.073692	0.074303
778	0.070248	0.075938	0.071346	0.071349	0.071545	0.071015	0.075347		778	0.071912	0.071642	0.071983	0.071811	0.072248	0.072151	0.07336		778	0.070215	0.069628	0.073811	0.075657	0.077747	0.078159	0.078111		778	0.070765	0.072841	0.072399	0.073647	0.073374	0.074371	0.075078
776	0.071356	0.077032	0.072213	0.073648	0.072875	0.071948	0.076103		776	0.072152	0.072634	0.07304	0.072378	0.072976	0.073967	0.074026		776	0.071773	0.071889	0.075229	0.077109	0.079028	0.079069	0.079303		776	0.071379	0.075313	0.074165	0.075107	0.07463	0.075943	0.076562
774	0.072446	0.077441	0.072874	0.074315	0.07337	0.073645	0.077866		774	0.073084	0.073166	0.073707	0.073354	0.073525	0.073579	0.074642		774	0.072999	0.072527	0.076824	0.077725	0.080412	0.08085	0.080228		774	0.072083	0.075825	0.075569	0.07627	0.075787	0.077231	0.077944
772	0.073724	0.079278	0.073687	0.074945	0.074107	0.073405	0.077217		772	0.07438	0.074421	0.074995	0.076391	0.075846	0.075101	0.075508		772	0.073983	0.074284	0.077126	0.079368	0.082402	0.082347	0.082103		772	0.073471	0.0771	0.077047	0.076962	0.076385	0.077697	0.078699
770	0.075733	0.081399	0.07642	0.076647	0.076239	0.075692	0.079441		770	0.075557	0.075868	0.076141	0.076149	0.076639	0.076755	0.077142		770	0.076007	0.075677	0.07879	0.081231	0.083028	0.083396	0.08302		770	0.07541	0.079315	0.078597	0.078847	0.079394	0.079974	0.081104
768	0.075484	0.081775	0.076501	0.077508	0.076258	0.075975	0.080156		768	0.077352	0.077265	0.077343	0.077444	0.078719	0.07911	0.078112		768	0.076355	0.076168	0.080523	0.080898	0.083711	0.083747	0.083967		768	0.075995	0.079898	0.079765	0.079341	0.079843	0.080375	0.080869
766	0.077038	0.082773	0.07807	0.079145	0.077364	0.077226	0.08026		766	0.078348	0.078444	0.078164	0.078887	0.078261	0.078846	0.078714		766	0.076783	0.077418	0.080937	0.083296	0.085677	0.085879	0.085596		766	0.077511	0.080105	0.079643	0.080981	0.08151	0.081827	0.082866
764	0.079624	0.084613	0.080377	0.081001	0.08015	0.079257	0.082774		764	0.079312	0.079417	0.07939	0.079966	0.079902	0.080895	0.08081		764	0.0794	0.080131	0.084166	0.085364	0.087866	0.087875	0.08798		764	0.079258	0.082593	0.082688	0.082648	0.083507	0.083458	0.085023
762	0.080917	0.086376	0.08091	0.081798	0.08097	0.080039	0.083199		762	0.081213	0.080954	0.0818	0.082055	0.081396	0.082503	0.08245		762	0.081385	0.081144	0.0853	0.086477	0.088789	0.088972	0.089266		762	0.08053	0.083892	0.083406	0.084185	0.084717	0.085977	0.086766
760	0.082356	0.08807	0.082821	0.083294	0.082768	0.081487	0.084743		760	0.083619	0.083734	0.083723	0.0835	0.083007	0.083964	0.083678		760	0.083093	0.082573	0.086662	0.087661	0.090706	0.090357	0.091088		760	0.081877	0.08573	0.08453	0.086103	0.086118	0.087813	0.089102
758	0.083318	0.088505	0.084312	0.08443	0.083807	0.082731	0.085933		758	0.08612	0.085957	0.086936	0.086518	0.085659	0.086567	0.086877		758	0.083862	0.084056	0.088316	0.089924	0.091653	0.092062	0.092935		758	0.083244	0.087238	0.086428	0.087868	0.087413	0.088653	0.089964
756	0.085769	0.090421	0.086198	0.087067	0.085576	0.085057	0.087791		756	0.086806	0.086224	0.087687	0.08691	0.086698	0.087001	0.087169		756	0.086412	0.08661	0.090329	0.092491	0.093965	0.095071	0.094541		756	0.085423	0.089558	0.088794	0.088847	0.090649	0.091573	0.092437
754	0.088031	0.093401	0.087977	0.088856	0.087854	0.086636	0.089403		754	0.088689	0.089365	0.089783	0.090272	0.08854	0.089218	0.089451		754	0.088584	0.08848	0.092248	0.094063	0.09586	0.097427	0.096821		754	0.088081	0.091154	0.090957	0.091692	0.091985	0.093361	0.09447
752	0.090479	0.095218	0.090087	0.09117	0.090083	0.089108	0.091195		752	0.090386	0.090647	0.090709	0.091443	0.090686	0.090365	0.090432		752	0.090827	0.090965	0.095171	0.097257	0.099173	0.099903	0.099476		752	0.090527	0.093515	0.093679	0.094612	0.094736	0.096187	0.097335
750	0.091416	0.096955	0.092261	0.092452	0.09134	0.090025	0.092154		750	0.093142	0.093921	0.093904	0.094969	0.093324	0.09372	0.093774		750	0.091928	0.092642	0.097018	0.098655	0.100611	0.101081	0.100765		750	0.09182	0.095133	0.095265	0.096051	0.096431	0.097768	0.098298
748	0.095576	0.100177	0.09571	0.095512	0.094737	0.092464	0.094878		748	0.095863	0.096287	0.096843	0.097105	0.097318	0.096827	0.096408		748	0.095893	0.095717	0.100219	0.102288	0.103897	0.104436	0.10409		748	0.095371	0.098906	0.098779	0.099789	0.10033	0.101113	0.102383
746	0.098658	0.10238	0.097882	0.098074	0.097026	0.095064	0.096947		746	0.099051	0.098988	0.09896	0.099588	0.099493	0.099311	0.098888		746	0.098036	0.097775	0.102169	0.104397	0.106265	0.106733	0.106659		746	0.097544	0.100825	0.100787	0.102837	0.102708	0.104189	0.104667
744	0.099787	0.104987	0.101227	0.101219	0.099035	0.096913	0.098776		744	0.101797	0.101767	0.102767	0.102233	0.101609	0.102379	0.102098		744	0.100329	0.100789	0.105381	0.107304	0.10916	0.110346	0.11046		744	0.10053	0.103896	0.104145	0.104963	0.105681	0.107679	0.108374
742	0.103483	0.109024	0.104122	0.104166	0.101812	0.100472	0.101979		742	0.104949	0.104914	0.106059	0.10535	0.104829	0.104392	0.104531		742	0.103554	0.104424	0.108817	0.110783	0.113147	0.113334	0.113782		742	0.103517	0.10737	0.107672	0.108685	0.109568	0.110967	0.111343
740	0.108029	0.112962	0.107721	0.107886	0.105589	0.103093	0.104212		740	0.108557	0.10906	0.109524	0.109383	0.10841	0.108858	0.108025		740	0.108032	0.108198	0.112634	0.114882	0.116938	0.117598	0.117589		740	0.107169	0.111525	0.111791	0.112484	0.113245	0.114864	0.115122
738	0.111299	0.116235	0.111457	0.111323	0.10927	0.106548	0.107332		738	0.111923	0.112792	0.112796	0.113157	0.112602	0.112678	0.112005		738	0.112074	0.112121	0.116664	0.118268	0.121124	0.122134	0.121527		738	0.111206	0.115812	0.115343	0.116654	0.117267	0.118795	0.119805
736	0.115211	0.119829	0.115157	0.114753	0.112023	0.109868	0.110559		736	0.115848	0.11588	0.116361	0.117026	0.11605	0.115959	0.114868		736	0.115129	0.115921	0.120335	0.122572	0.124815	0.125449	0.12559		736	0.114777	0.119478	0.119789	0.120968	0.121264	0.122856	0.123843
734	0.119007	0.123352	0.119298	0.118977	0.115952	0.113649	0.113709		734	0.11895	0.119299	0.120377	0.120341	0.119768	0.119488	0.118357		734	0.119871	0.120392	0.124728	0.126468	0.128854	0.12944	0.1291		734	0.118336	0.123115	0.123329	0.124582	0.125571	0.127146	0.128245
732	0.123186	0.126835	0.122294	0.122639	0.119187	0.116022	0.115958		732	0.123058	0.124013	0.1251	0.124404	0.124018	0.123773	0.122796		732	0.123758	0.123985	0.128859	0.13104	0.13311	0.133228	0.133135		732	0.122722	0.126946	0.127609	0.128488	0.129382	0.130767	0.13229
730	0.126592	0.1305	0.127137	0.12592	0.123061	0.119195	0.118264		730	0.127378	0.127956	0.12884	0.129159	0.128218	0.127481	0.126313		730	0.126611	0.127812	0.132804	0.134214	0.136842	0.137677	0.137312		730	0.126039	0.130526	0.13161	0.132746	0.132785	0.135062	0.136148
728	0.131652	0.136642	0.131771	0.130907	0.127797	0.123984	0.122578		728	0.13261	0.133104	0.133413	0.13416	0.133304	0.13273	0.130992		728	0.132017	0.133379	0.137623	0.140538	0.142703	0.14315	0.142288		728	0.13168	0.135931	0.136518	0.138365	0.138743	0.140879	0.141658
726	0.137423	0.141288	0.136859	0.135897	0.132606	0.128816	0.127042		726	0.138751	0.138951	0.139791	0.13962	0.138457	0.137971	0.136554		726	0.137982	0.139474	0.143616	0.145781	0.148415	0.148739	0.14866		726	0.136905	0.14144	0.142638	0.14364	0.144301	0.147142	0.147778
724	0.144612	0.148246	0.143449	0.14205	0.138244	0.133904	0.132462		724	0.144204	0.144967	0.145743	0.145778	0.1442	0.143778	0.142313		724	0.144373	0.145332	0.15002	0.152552	0.154537	0.155519	0.155184		724	0.143344	0.14815	0.149125	0.150888	0.151042	0.153032	0.154753
722	0.151072	0.155053	0.150826	0.149036	0.145567	0.140724	0.137838		722	0.150646	0.1513	0.152579	0.152142	0.151043	0.150108	0.148518		722	0.15142	0.152614	0.157754	0.159852	0.162014	0.162996	0.163174		722	0.150334	0.155422	0.155438	0.157798	0.15899	0.160555	0.161949
720	0.158381	0.161916	0.157491	0.156352	0.15217	0.146963	0.143768		720	0.158076	0.158389	0.16032	0.160005	0.158418	0.158078	0.155958		720	0.157734	0.159899	0.164498	0.167438	0.169546	0.170312	0.170214		720	0.157716	0.163152	0.163958	0.164893	0.166484	0.168524	0.169539
718	0.165866	0.170398	0.165539	0.163534	0.159728	0.153925	0.149705		718	0.16639	0.166927	0.168439	0.16871	0.167137	0.166544	0.164211		718	0.166721	0.167933	0.173783	0.175632	0.177752	0.179252	0.178888		718	0.16592	0.170578	0.171999	0.173827	0.174875	0.176917	0.178001
716	0.174875	0.178775	0.173957	0.17195	0.167355	0.161212	0.156565		716	0.17469	0.175396	0.176244	0.17659	0.175224	0.174702	0.172015		716	0.175371	0.176744	0.182239	0.184851	0.186893	0.187448	0.188081		716	0.174156	0.178611	0.179777	0.182179	0.183588	0.185861	0.187956
714	0.184218	0.187685	0.182976	0.179873	0.175611	0.169294	0.163965		714	0.184225	0.184532	0.186269	0.185976	0.18477	0.184195	0.180847		714	0.184088	0.185504	0.191065	0.193262	0.195955	0.196475	0.196834		714	0.182911	0.18854	0.189121	0.191129	0.192477	0.194833	0.196366
712	0.192898	0.196017	0.191808	0.189718	0.18447	0.177666	0.171229		712	0.193124	0.193683	0.194576	0.19539	0.194082	0.192707	0.19052		712	0.192559	0.194607	0.200053	0.20311	0.205706	0.206726	0.206545		712	0.192026	0.197557	0.198894	0.201292	0.202339	0.20428	0.205937
710	0.202483	0.206276	0.201516	0.199889	0.193425	0.186397	0.178653		710	0.203206	0.203193	0.205186	0.206163	0.204548	0.202874	0.199995		710	0.202863	0.204818	0.21061	0.21353	0.216458	0.217236	0.217151		710	0.202159	0.207905	0.209689	0.211652	0.213269	0.214785	0.216711
708	0.213339	0.216757	0.213315	0.210665	0.203417	0.195957	0.188554		708	0.21345	0.214829	0.216531	0.217283	0.215648	0.214694	0.210719		708	0.213885	0.215881	0.221634	0.225112	0.228096	0.228865	0.229319		708	0.213673	0.218867	0.220319	0.22273	0.224318	0.226531	0.228235
706	0.224909	0.227912	0.224582	0.22176	0.214227	0.2057	0.197403		706	0.226103	0.227476	0.229043	0.229885	0.228069	0.22688	0.22367		706	0.225215	0.226934	0.233559	0.236437	0.239955	0.240386	0.241155		706	0.224873	0.229729	0.231927	0.234193	0.235341	0.238199	0.239823
704	0.237505	0.24057	0.236338	0.233877	0.226174	0.217111	0.207751		704	0.238113	0.239424	0.240871	0.242274	0.240501	0.239397	0.235744		704	0.237472	0.239634	0.246257	0.249416	0.253059	0.253703	0.253796		704	0.236275	0.242096	0.244473	0.246725	0.248707	0.251031	0.252641
702	0.249929	0.25375	0.249751	0.246521	0.238502	0.229605	0.218928		702	0.250522	0.25134	0.253815	0.255078	0.252911	0.252426	0.248046		702	0.251453	0.253598	0.259821	0.263064	0.266519	0.267728	0.268111		702	0.249465	0.25646	0.257899	0.260207	0.262147	0.264711	0.266814
700	0.264039	0.267392	0.263584	0.260233	0.25219	0.242208	0.229973		700	0.264136	0.26489	0.268104	0.269288	0.267138	0.265829	0.261651		700	0.264796	0.267314	0.27391	0.277377	0.280434	0.281854	0.282623		700	0.263513	0.2702	0.271496	0.27472	0.276377	0.279125	0.280728
698	0.278142	0.280947	0.277261	0.274039	0.264928	0.254674	0.241826		698	0.278259	0.279118	0.282125	0.283601	0.282247	0.280399	0.275814		698	0.27813	0.28117	0.288265	0.292129	0.295632	0.296192	0.297528		698	0.277404	0.284077	0.286105	0.288974	0.290758	0.293395	0.294997
696	0.292869	0.295396	0.292001	0.288041	0.278509	0.268171	0.254178		696	0.293303	0.294663	0.297348	0.29889	0.297089	0.295795	0.290991		696	0.293252	0.296249	0.30311	0.30695	0.311146	0.312014	0.313335		696	0.29202	0.298574	0.301265	0.30383	0.306274	0.308571	0.310371
694	0.308854	0.311249	0.3084	0.304778	0.294335	0.282931	0.267293		694	0.308649	0.309858	0.313105	0.314941	0.313032	0.311817	0.306978		694	0.309137	0.311671	0.319401	0.323563	0.327787	0.328938	0.330024		694	0.307972	0.314908	0.317592	0.320134	0.322748	0.325499	0.327152
692	0.324364	0.326465	0.323891	0.319619	0.309645	0.297227	0.28035		692	0.325174	0.326648	0.330221	0.331905	0.330481	0.32903	0.323563		692	0.324761	0.32741	0.335572	0.339299	0.343537	0.34508	0.346382		692	0.323656	0.330481	0.332652	0.335636	0.338388	0.341048	0.342762
690	0.340901	0.342675	0.340161	0.336366	0.325645	0.312425	0.294809		690	0.340617	0.342383	0.34654	0.348557	0.347316	0.345003	0.340134		690	0.341178	0.344992	0.352009	0.356701	0.361306	0.36241	0.364624		690	0.340645	0.347145	0.350316	0.353079	0.355727	0.358504	0.360776
688	0.358069	0.360131	0.357444	0.353308	0.342143	0.328197	0.309189		688	0.357995	0.359079	0.363416	0.366291	0.365	0.362725	0.357516		688	0.358173	0.361813	0.369609	0.374756	0.379769	0.380869	0.382824		688	0.357242	0.364621	0.367278	0.370979	0.373285	0.376364	0.378173
686	0.37565	0.377484	0.374911	0.370647	0.358578	0.344422	0.324193		686	0.375992	0.377361	0.381954	0.384982	0.383461	0.381598	0.375026		686	0.375869	0.379517	0.387536	0.392719	0.397635	0.398951	0.401174		686	0.374986	0.381786	0.385206	0.388539	0.391486	0.394162	0.396384
684	0.393183	0.395209	0.392712	0.388221	0.37543	0.360766	0.339155		684	0.393577	0.395694	0.400115	0.403579	0.402002	0.399564	0.393735		684	0.394012	0.39749	0.405939	0.410711	0.416417	0.418316	0.419895		684	0.392565	0.40017	0.403365	0.406531	0.409277	0.412835	0.41468
682	0.411405	0.413618	0.41087	0.406486	0.393225	0.377589	0.354863		682	0.411041	0.413698	0.417792	0.422102	0.4204	0.418344	0.412199		682	0.41198	0.415709	0.424925	0.430029	0.435405	0.437113	0.439256		682	0.411098	0.418582	0.421968	0.425302	0.427734	0.430991	0.433751
680	0.429889	0.431575	0.429472	0.424666	0.41098	0.394945	0.370274		680	0.429586	0.431812	0.436783	0.440441	0.43943	0.437361	0.430765		680	0.430317	0.434323	0.443735	0.449826	0.454812	0.457236	0.459126		680	0.429305	0.437318	0.440516	0.444172	0.446595	0.450676	0.452856
678	0.449099	0.450504	0.448513	0.443916	0.429538	0.412182	0.386299		678	0.448392	0.45042	0.455879	0.459785	0.459272	0.456491	0.449822		678	0.448878	0.453927	0.462958	0.469042	0.474277	0.477033	0.479084		678	0.448502	0.456448	0.459626	0.463336	0.466223	0.46978	0.472637
676	0.467016	0.468864	0.46723	0.461691	0.447222	0.428596	0.402001		676	0.467604	0.469809	0.475322	0.479438	0.478895	0.476291	0.46898		676	0.467401	0.472495	0.482048	0.48813	0.4945	0.496311	0.498411		676	0.467486	0.475081	0.478404	0.4827	0.485052	0.488715	0.491434
674	0.486995	0.48709	0.486084	0.480856	0.465684	0.446659	0.418119		674	0.486939	0.488756	0.494744	0.499019	0.497405	0.495478	0.488114		674	0.486829	0.491544	0.501465	0.50774	0.514096	0.516087	0.519196		674	0.486434	0.49435	0.498342	0.502506	0.505561	0.509134	0.511135
672	0.506008	0.505519	0.504836	0.499001	0.483266	0.463646	0.433003		672	0.505174	0.506986	0.51339	0.518403	0.516693	0.514614	0.506504		672	0.5063	0.510791	0.520213	0.527512	0.533325	0.535519	0.539436		672	0.505626	0.513239	0.516683	0.520712	0.524037	0.528322	0.530751
670	0.524759	0.524328	0.52358	0.517825	0.500824	0.480801	0.448489		670	0.524888	0.526661	0.532795	0.537972	0.536624	0.533922	0.526265		670	0.525226	0.529709	0.540303	0.546827	0.552778	0.555434	0.558931		670	0.524265	0.532879	0.536005	0.540329	0.543365	0.547748	0.550186
668	0.544003	0.543492	0.542502	0.536249	0.51859	0.4977	0.464171		668	0.543659	0.545636	0.552037	0.556961	0.555272	0.552781	0.544547		668	0.544029	0.549422	0.559739	0.566244	0.572267	0.574944	0.578355		668	0.543268	0.552113	0.55548	0.560047	0.563534	0.56753	0.570051
666	0.562917	0.56144	0.559826	0.553925	0.53581	0.513868	0.4793		666	0.562091	0.563685	0.570262	0.575653	0.573393	0.570697	0.562352		666	0.5633	0.567452	0.577955	0.585276	0.591628	0.593964	0.597719		666	0.562555	0.570444	0.575074	0.579194	0.582342	0.586582	0.58833
664	0.581338	0.579715	0.578113	0.571284	0.552317	0.529514	0.493985		664	0.580571	0.581889	0.588298	0.594109	0.591576	0.588675	0.579579		664	0.581701	0.586093	0.596985	0.6038	0.610341	0.613261	0.616594		664	0.580819	0.589399	0.593889	0.597901	0.601397	0.605025	0.607974
662	0.599406	0.596914	0.595251	0.587943	0.568318	0.544782	0.507679		662	0.598874	0.599647	0.60626	0.611342	0.609587	0.606187	0.596092		662	0.600277	0.604051	0.615027	0.621732	0.62881	0.631488	0.634934		662	0.599239	0.607817	0.611725	0.615801	0.619886	0.623317	0.626345
660	0.618033	0.61464	0.612504	0.605127	0.583778	0.560247	0.521048		660	0.616785	0.617148	0.623928	0.628413	0.626417	0.622872	0.612388		660	0.618456	0.622476	0.633027	0.639954	0.646905	0.649982	0.653163		660	0.617951	0.626286	0.630057	0.634684	0.638382	0.641869	0.644616
658	0.635802	0.6317	0.629406	0.620454	0.599134	0.574207	0.533935		658	0.634237	0.634524	0.640134	0.645404	0.642548	0.638974	0.628599		658	0.636253	0.639646	0.650579	0.657362	0.6642	0.667076	0.670063		658	0.635383	0.64419	0.647562	0.65265	0.655714	0.659853	0.662571
656	0.65257	0.648066	0.645309	0.635694	0.613639	0.587402	0.546074		656	0.651377	0.651233	0.657071	0.661364	0.658498	0.654181	0.643484		656	0.652916	0.656848	0.667508	0.674343	0.680416	0.683459	0.686789		656	0.652387	0.661252	0.664771	0.669841	0.673068	0.677392	0.679737
654	0.6692	0.663441	0.659952	0.649599	0.626911	0.600422	0.55716		654	0.668331	0.667579	0.673359	0.677087	0.674084	0.668489	0.657718		654	0.669639	0.673382	0.68368	0.690647	0.697091	0.699796	0.702303		654	0.6693	0.678132	0.681922	0.68696	0.689873	0.694034	0.696967
652	0.686582	0.679551	0.674993	0.664364	0.640058	0.612787	0.568423		652	0.685177	0.683559	0.688255	0.692238	0.688223	0.682592	0.670508		652	0.68674	0.689747	0.699899	0.707283	0.714184	0.714969	0.718041		652	0.686352	0.695185	0.6987	0.704058	0.706849	0.711474	0.713926
650	0.702728	0.695043	0.68969	0.678009	0.652807	0.62442	0.578565		650	0.701088	0.698351	0.702957	0.706761	0.701981	0.69544	0.683383		650	0.703067	0.705596	0.716106	0.722842	0.729025	0.730527	0.733519		650	0.702721	0.711661	0.714886	0.720283	0.723152	0.727744	0.729843
648	0.717946	0.709165	0.702661	0.690468	0.663761	0.634804	0.587974		648	0.716807	0.713094	0.716972	0.719909	0.714737	0.707892	0.694828		648	0.718584	0.72081	0.730872	0.737403	0.743553	0.744981	0.747922		648	0.71781	0.726588	0.730468	0.73534	0.739148	0.742954	0.745153
646	0.733182	0.722747	0.715327	0.70185	0.674059	0.644582	0.596406		646	0.732245	0.728256	0.730356	0.73314	0.727543	0.719653	0.706177		646	0.733353	0.735091	0.744325	0.751114	0.757066	0.757756	0.760833		646	0.732997	0.741521	0.745862	0.749774	0.753239	0.75754	0.759958
644	0.748157	0.736204	0.727788	0.713597	0.685006	0.653686	0.604861		644	0.746583	0.742042	0.743276	0.745269	0.738312	0.729886	0.715591		644	0.748527	0.749684	0.758552	0.764599	0.770221	0.771237	0.773317		644	0.748057	0.756769	0.760432	0.765524	0.768098	0.772487	0.775201
642	0.762309	0.748961	0.739537	0.724122	0.694359	0.66216	0.612163		642	0.761438	0.755337	0.756341	0.756269	0.749009	0.739689	0.725036		642	0.762796	0.763751	0.772278	0.777973	0.782378	0.784115	0.785592		642	0.76236	0.771159	0.774908	0.778992	0.782643	0.786826	0.789024
640	0.77665	0.761624	0.750811	0.733581	0.703613	0.669906	0.618779		640	0.775718	0.767642	0.767926	0.766742	0.758953	0.748868	0.732849		640	0.777118	0.776739	0.785007	0.790637	0.795277	0.795708	0.796998		640	0.776255	0.785239	0.789006	0.793051	0.796086	0.800602	0.802807
638	0.789481	0.77296	0.761286	0.743114	0.711602	0.676775	0.624645		638	0.787941	0.77939	0.778708	0.776639	0.767893	0.756892	0.740676		638	0.790234	0.789221	0.796826	0.802081	0.806568	0.806304	0.807562		638	0.790184	0.797802	0.801972	0.806	0.808938	0.81352	0.816281
636	0.801958	0.784077	0.770847	0.751526	0.718619	0.682666	0.629904		636	0.800318	0.790795	0.788673	0.786238	0.776492	0.764818	0.747334		636	0.802917	0.801328	0.807975	0.812779	0.816986	0.816727	0.817099		636	0.802617	0.810424	0.814049	0.817768	0.821407	0.825232	0.828435
634	0.815103	0.794708	0.779977	0.759103	0.72552	0.688411	0.634678		634	0.812849	0.801652	0.798056	0.795604	0.784191	0.771887	0.753539		634	0.814928	0.812792	0.819111	0.822962	0.827041	0.826674	0.82622		634	0.815179	0.822819	0.826433	0.829555	0.833077	0.837519	0.839686
632	0.826197	0.804671	0.787824	0.766433	0.731229	0.693463	0.638515		632	0.824103	0.811531	0.807208	0.803047	0.791029	0.777802	0.758799		632	0.826116	0.823077	0.829555	0.83302	0.83678	0.835093	0.834933		632	0.826753	0.83447	0.837088	0.84088	0.844355	0.848325	0.850913
630	0.836631	0.812937	0.794928	0.772726	0.735883	0.697366	0.641186		630	0.834781	0.820631	0.81529	0.809631	0.797283	0.782937	0.763189		630	0.836144	0.832587	0.83862	0.841294	0.844718	0.842895	0.84233		630	0.836954	0.844451	0.847579	0.851292	0.854715	0.858505	0.860779
628	0.846493	0.821485	0.802341	0.778031	0.740484	0.701184	0.644237		628	0.845096	0.829728	0.822966	0.816293	0.803149	0.787572	0.766981		628	0.846915	0.842583	0.847161	0.849983	0.852581	0.850459	0.849258		628	0.846905	0.854049	0.856725	0.860714	0.863592	0.868321	0.870157
626	0.855214	0.829078	0.808744	0.7829	0.743757	0.703436	0.646976		626	0.854637	0.838027	0.830163	0.822152	0.807576	0.791365	0.770215		626	0.856288	0.851045	0.855024	0.857469	0.858732	0.857193	0.855736		626	0.856341	0.862991	0.866487	0.869969	0.871962	0.876899	0.878819
624	0.864061	0.83578	0.814378	0.787016	0.747152	0.705665	0.647995		624	0.863491	0.845271	0.836247	0.827074	0.811498	0.79471	0.772227		624	0.864812	0.858863	0.862513	0.864532	0.865261	0.863112	0.861099		624	0.86469	0.872129	0.875058	0.878537	0.880533	0.885117	0.886912
622	0.872495	0.842035	0.81929	0.790668	0.749734	0.707663	0.648846		622	0.870754	0.851879	0.841658	0.831727	0.814617	0.796545	0.773767		622	0.873055	0.865923	0.869181	0.870672	0.871409	0.868011	0.865593		622	0.872902	0.880202	0.882709	0.885772	0.887931	0.892521	0.894508
620	0.879946	0.848182	0.823702	0.793866	0.751552	0.709183	0.64902		620	0.878018	0.857651	0.846001	0.835302	0.816998	0.798095	0.775046		620	0.880172	0.872455	0.875374	0.875924	0.876609	0.872272	0.869549		620	0.880909	0.887252	0.889968	0.892855	0.8952	0.899264	0.901664
618	0.886505	0.853133	0.827052	0.796059	0.753138	0.709513	0.648963		618	0.884958	0.862847	0.849774	0.837823	0.819421	0.799121	0.77522		618	0.8863	0.878525	0.88075	0.880683	0.88029	0.876071	0.872491		618	0.887234	0.89384	0.89614	0.898918	0.901116	0.905239	0.907598
616	0.891745	0.856963	0.82918	0.79691	0.75301	0.709111	0.648398		616	0.890369	0.867113	0.852657	0.839294	0.820247	0.799052	0.774454		616	0.891446	0.882775	0.884286	0.884172	0.883214	0.878654	0.875005		616	0.892312	0.898628	0.900963	0.903196	0.906021	0.909792	0.911478
614	0.89586	0.859753	0.8308	0.797635	0.752357	0.708127	0.646893		614	0.894688	0.870462	0.855252	0.840792	0.820508	0.798407	0.773769		614	0.896117	0.886362	0.887103	0.886956	0.885308	0.880419	0.875772		614	0.896531	0.90333	0.904865	0.906998	0.909845	0.91306	0.915409
612	0.89951	0.862139	0.831408	0.798163	0.751833	0.706586	0.645397		612	0.898	0.872511	0.85648	0.841284	0.820407	0.797375	0.771496		612	0.900218	0.89002	0.890128	0.888932	0.886746	0.881673	0.876755		612	0.90076	0.9072	0.908607	0.910742	0.913646	0.916576	0.918335
610	0.902602	0.863934	0.83197	0.797719	0.750728	0.704687	0.64327		610	0.900263	0.874201	0.856843	0.840517	0.818553	0.795295	0.768581		610	0.903341	0.892306	0.891307	0.889791	0.887649	0.881941	0.876798		610	0.903759	0.909544	0.911437	0.913328	0.915893	0.918963	0.920622
608	0.904376	0.864773	0.831377	0.795708	0.748674	0.70186	0.640359		608	0.902276	0.875141	0.856888	0.839338	0.816707	0.793008	0.765898		608	0.905258	0.893217	0.891929	0.889954	0.887131	0.880832	0.875688		608	0.905427	0.911046	0.912697	0.914472	0.916938	0.920245	0.922134
606	0.905287	0.864711	0.829991	0.793765	0.746047	0.698943	0.637099		606	0.903216	0.874754	0.855621	0.837932	0.814114	0.789768	0.762607		606	0.906068	0.893007	0.892365	0.889572	0.885924	0.879585	0.87426		606	0.906464	0.911861	0.913132	0.915185	0.917318	0.920094	0.922543
604	0.904899	0.862963	0.828081	0.791061	0.742068	0.695075	0.633439		604	0.903358	0.874153	0.853572	0.835149	0.81099	0.785457	0.758269		604	0.905555	0.892718	0.891588	0.887703	0.884515	0.877476	0.871495		604	0.90634	0.91148	0.912492	0.914575	0.916867	0.919823	0.921071
602	0.903882	0.860991	0.82492	0.786739	0.738107	0.690546	0.629281		602	0.902496	0.872022	0.850376	0.831248	0.806684	0.780926	0.753142		602	0.904593	0.891151	0.889212	0.885055	0.881493	0.874171	0.86769		602	0.905034	0.910276	0.910922	0.913243	0.915099	0.918465	0.919783
600	0.901966	0.858464	0.821093	0.781882	0.733197	0.685462	0.624573		600	0.900054	0.869097	0.846851	0.826733	0.801836	0.775155	0.746803		600	0.902065	0.887932	0.885869	0.88138	0.877342	0.869688	0.86333		600	0.902734	0.908527	0.908512	0.910607	0.912596	0.915637	0.916986
598	0.898969	0.854502	0.81687	0.776816	0.727629	0.680024	0.619388		598	0.896991	0.86521	0.842696	0.821933	0.796312	0.769636	0.740655		598	0.899079	0.884715	0.881645	0.877332	0.872653	0.865323	0.858409		598	0.899806	0.905086	0.9051	0.906716	0.908959	0.912457	0.913265
596	0.894843	0.849862	0.811213	0.771382	0.721627	0.674591	0.613654		596	0.89266	0.860494	0.837664	0.815897	0.789527	0.762769	0.734153		596	0.894927	0.879966	0.87663	0.872202	0.86715	0.859902	0.851949		596	0.896402	0.900728	0.90106	0.902542	0.904169	0.907514	0.908368
594	0.889574	0.844181	0.805064	0.764795	0.715495	0.668012	0.607577		594	0.887425	0.855316	0.831368	0.809325	0.782651	0.755436	0.726615		594	0.890103	0.874562	0.871191	0.865765	0.860806	0.853183	0.844972		594	0.891535	0.895494	0.896339	0.897681	0.898567	0.901697	0.903196
592	0.883426	0.837678	0.797936	0.757444	0.708286	0.660961	0.601246		592	0.881527	0.848463	0.824162	0.801873	0.775331	0.747629	0.718611		592	0.88404	0.868078	0.864655	0.858861	0.853851	0.845763	0.837764		592	0.884733	0.888998	0.889687	0.89103	0.89256	0.894875	0.896985
590	0.877048	0.830621	0.790582	0.749571	0.700151	0.65377	0.594398		590	0.874855	0.841282	0.816176	0.793522	0.766835	0.73899	0.709951		590	0.877161	0.861046	0.857628	0.851567	0.8462	0.83758	0.829363		590	0.877689	0.882197	0.882497	0.883697	0.88548	0.887915	0.889338
588	0.868919	0.822743	0.782477	0.740794	0.691903	0.645428	0.58698		588	0.867313	0.833437	0.808265	0.784936	0.75796	0.73014	0.701424		588	0.868982	0.852669	0.849174	0.842922	0.837065	0.828363	0.820398		588	0.869847	0.874525	0.874233	0.875147	0.877063	0.879137	0.880318
586	0.859478	0.813338	0.772978	0.731634	0.683202	0.636302	0.579656		586	0.858407	0.824213	0.799222	0.775403	0.748292	0.720699	0.692103		586	0.860329	0.843609	0.839581	0.833275	0.827115	0.818526	0.810657		586	0.861245	0.865504	0.864977	0.865935	0.867834	0.86976	0.871258
584	0.849963	0.80361	0.762559	0.72201	0.673737	0.627845	0.571721		584	0.848891	0.814628	0.789225	0.765104	0.737928	0.710417	0.681534		584	0.850582	0.833977	0.829649	0.823373	0.816866	0.808251	0.79995		584	0.851736	0.8561	0.855006	0.855658	0.85793	0.859985	0.861435
582	0.839712	0.793599	0.752563	0.712019	0.664272	0.619016	0.563802		582	0.838572	0.80393	0.778682	0.754619	0.727178	0.699633	0.671169		582	0.840723	0.823758	0.819239	0.812662	0.806388	0.797603	0.788993		582	0.841745	0.84603	0.845112	0.845307	0.847135	0.849292	0.850712
580	0.828534	0.782689	0.74227	0.701484	0.65446	0.609215	0.555522		580	0.827204	0.7931	0.767364	0.74318	0.716158	0.688918	0.660372		580	0.829387	0.812259	0.808323	0.801071	0.794969	0.786111	0.777443		580	0.830647	0.834566	0.8337	0.834074	0.835446	0.837677	0.83883
578	0.817009	0.771395	0.730868	0.690411	0.644228	0.599524	0.546948		578	0.815413	0.781662	0.755639	0.731429	0.705033	0.677495	0.649854		578	0.817668	0.800992	0.796185	0.788883	0.782663	0.774066	0.765075		578	0.818614	0.82228	0.821231	0.822149	0.823517	0.825806	0.826524
576	0.804623	0.759294	0.718462	0.678895	0.63341	0.589588	0.537926		576	0.803009	0.769131	0.743098	0.718913	0.692773	0.66523	0.638465		576	0.805312	0.788829	0.783362	0.776746	0.769658	0.761523	0.752884		576	0.806159	0.80926	0.808747	0.809445	0.810824	0.813041	0.814031
574	0.79129	0.746543	0.705836	0.667043	0.621945	0.579324	0.528849		574	0.790428	0.756459	0.730687	0.706938	0.680366	0.65343	0.626782		574	0.791736	0.77539	0.770194	0.763884	0.756987	0.748471	0.739868		574	0.793223	0.796549	0.795738	0.796187	0.797048	0.799429	0.800426
572	0.777627	0.733685	0.693161	0.654914	0.610809	0.568793	0.519606		572	0.777088	0.743207	0.717932	0.693951	0.667876	0.641541	0.614788		572	0.778118	0.761789	0.756628	0.749995	0.743261	0.734787	0.726175		572	0.779514	0.782666	0.781627	0.782274	0.783123	0.785387	0.78603
570	0.763623	0.719959	0.680204	0.642446	0.599405	0.558041	0.510813		570	0.762484	0.729131	0.703964	0.680547	0.654585	0.628886	0.602833		570	0.764182	0.747631	0.74222	0.735868	0.729089	0.720595	0.712159		570	0.764969	0.768148	0.767458	0.76762	0.769184	0.770518	0.771604
568	0.749229	0.705985	0.666907	0.629747	0.587718	0.547402	0.501776		568	0.747467	0.714948	0.689649	0.666929	0.641048	0.616314	0.590718		568	0.749451	0.732995	0.727711	0.721454	0.714408	0.706225	0.697979		568	0.750524	0.753684	0.752819	0.752794	0.753876	0.755613	0.756858
566	0.73391	0.691988	0.653277	0.616918	0.57596	0.536715	0.492479		566	0.731997	0.700403	0.675368	0.652848	0.62771	0.603423	0.57826		566	0.734087	0.717656	0.712989	0.706556	0.69968	0.691916	0.683385		566	0.735419	0.738495	0.737277	0.737477	0.738296	0.740208	0.74141
564	0.718166	0.677562	0.639542	0.603836	0.563755	0.526033	0.483208		564	0.71672	0.685805	0.661278	0.63902	0.61472	0.590355	0.566174		564	0.718503	0.702578	0.698029	0.691813	0.685093	0.677182	0.668727		564	0.719576	0.72297	0.721641	0.721749	0.723306	0.724541	0.725599
562	0.702483	0.662637	0.625795	0.590643	0.551758	0.515313	0.473731		562	0.701291	0.67043	0.646828	0.625049	0.601118	0.577203	0.554081		562	0.702801	0.687389	0.682846	0.676437	0.669872	0.662035	0.654142		562	0.703806	0.707273	0.7057	0.705923	0.707176	0.708287	0.709209
560	0.686558	0.647588	0.611493	0.577797	0.539672	0.504338	0.46439		560	0.685498	0.654963	0.63209	0.610698	0.587099	0.564027	0.541472		560	0.686821	0.67151	0.667188	0.660562	0.654375	0.646682	0.639178		560	0.687569	0.690811	0.689346	0.689852	0.690306	0.691904	0.692971
558	0.670662	0.632778	0.597127	0.564501	0.527844	0.493327	0.455733		558	0.669135	0.639677	0.616973	0.595889	0.573436	0.550945	0.529029		558	0.671105	0.655974	0.651312	0.644973	0.638917	0.631903	0.624196		558	0.671449	0.67428	0.673082	0.673573	0.673983	0.676142	0.676864
556	0.653454	0.616891	0.58243	0.550523	0.515783	0.482145	0.446683		556	0.652066	0.62355	0.601397	0.5811	0.559315	0.537482	0.516257		556	0.653991	0.639147	0.634782	0.629161	0.622873	0.616344	0.608645		556	0.654778	0.657438	0.656325	0.65651	0.657128	0.659006	0.659461
554	0.635886	0.600547	0.567062	0.536557	0.503209	0.470829	0.436811		554	0.635287	0.607212	0.585753	0.566629	0.545223	0.524099	0.503762		554	0.636152	0.621929	0.618063	0.612379	0.606529	0.599737	0.592604		554	0.637133	0.639883	0.638853	0.638813	0.639853	0.640739	0.641778
552	0.619153	0.585213	0.552605	0.523185	0.490768	0.460096	0.427637		552	0.618488	0.591416	0.570704	0.551862	0.531493	0.511236	0.491682		552	0.619626	0.605551	0.601598	0.596172	0.590489	0.583946	0.57737		552	0.62024	0.622892	0.621743	0.621735	0.622806	0.623801	0.624583
550	0.602435	0.570046	0.538648	0.510092	0.478804	0.449791	0.419075		550	0.601483	0.575604	0.555582	0.537171	0.517791	0.498129	0.47968		550	0.603344	0.589374	0.585548	0.580557	0.575045	0.568607	0.562123		550	0.603548	0.606535	0.605238	0.605228	0.606088	0.607354	0.607675
548	0.585634	0.554392	0.524144	0.496797	0.467084	0.439326	0.410218		548	0.584668	0.559708	0.54043	0.522659	0.50396	0.485122	0.467855		548	0.586162	0.57319	0.56954	0.564616	0.559523	0.553518	0.546905		548	0.586783	0.589556	0.588494	0.588271	0.58919	0.59002	0.590872
546	0.568948	0.53903	0.50969	0.483616	0.455602	0.429118	0.401868		546	0.567799	0.543782	0.525163	0.508055	0.49018	0.472406	0.455668		546	0.569059	0.556884	0.553533	0.548762	0.543668	0.53821	0.531893		546	0.569989	0.572478	0.571682	0.571345	0.572144	0.573131	0.574063
544	0.552089	0.523943	0.495465	0.470637	0.44406	0.419078	0.393647		544	0.551028	0.527924	0.510078	0.493947	0.47702	0.4598	0.444026		544	0.552434	0.540523	0.53777	0.532985	0.528149	0.522953	0.517061		544	0.55326	0.556152	0.554935	0.554809	0.555167	0.556444	0.557141
542	0.535149	0.50859	0.481231	0.457698	0.432492	0.408902	0.385257		542	0.534464	0.512212	0.495389	0.480066	0.463682	0.447568	0.432914		542	0.535688	0.52408	0.521775	0.517222	0.512851	0.507665	0.502128		542	0.536514	0.539537	0.537975	0.53783	0.538424	0.539427	0.540409
540	0.518815	0.493572	0.467449	0.445035	0.42124	0.398956	0.377018		540	0.518183	0.496841	0.480885	0.466403	0.450672	0.435492	0.421677		540	0.519133	0.507996	0.505814	0.501862	0.497681	0.492867	0.487647		540	0.519971	0.52298	0.521472	0.520943	0.52212	0.522709	0.523809
538	0.502963	0.479089	0.453758	0.432941	0.410365	0.389462	0.369373		538	0.502194	0.481699	0.466485	0.452725	0.437956	0.423657	0.410568		538	0.50305	0.492535	0.490434	0.486921	0.482975	0.478655	0.473494		538	0.503881	0.506756	0.505096	0.505029	0.505743	0.506414	0.507563
536	0.486997	0.464522	0.440207	0.420598	0.399699	0.380172	0.3619		536	0.486201	0.466666	0.452382	0.43913	0.425287	0.411922	0.399897		536	0.48716	0.476933	0.475203	0.471791	0.468276	0.464093	0.459224		536	0.487623	0.490514	0.488944	0.489206	0.48945	0.490242	0.491466
534	0.471333	0.45016	0.427187	0.408415	0.389398	0.371031	0.354431		534	0.470684	0.452033	0.438792	0.426258	0.413215	0.400847	0.389663		534	0.471418	0.461376	0.460141	0.456994	0.453588	0.449759	0.445268		534	0.471805	0.474605	0.473323	0.47323	0.473824	0.474276	0.475573
532	0.455825	0.4361	0.414312	0.396893	0.379283	0.361961	0.347216		532	0.455385	0.437752	0.425346	0.413689	0.40148	0.389971	0.379664		532	0.456104	0.446548	0.445705	0.442658	0.439506	0.435929	0.43179		532	0.456545	0.459206	0.457795	0.457605	0.458187	0.458918	0.459968
530	0.44051	0.422123	0.401367	0.385414	0.369278	0.353213	0.340121		530	0.440158	0.423324	0.411981	0.401035	0.389607	0.379023	0.369665		530	0.441029	0.431852	0.431395	0.428424	0.425676	0.422292	0.418603		530	0.441263	0.444043	0.442351	0.44222	0.442827	0.44374	0.444477
528	0.425535	0.408405	0.388979	0.374289	0.359382	0.34484	0.33322		528	0.425027	0.409108	0.398586	0.388569	0.377885	0.368269	0.35972		528	0.426062	0.417248	0.416993	0.414457	0.412102	0.409236	0.405629		528	0.426097	0.429144	0.427541	0.427301	0.427865	0.428693	0.429495
526	0.411018	0.39527	0.376907	0.363596	0.349673	0.336711	0.326843		526	0.410534	0.395462	0.385595	0.376599	0.366856	0.357851	0.35018		526	0.411377	0.403178	0.403064	0.400988	0.398855	0.396444	0.393048		526	0.41166	0.414588	0.413134	0.41275	0.413198	0.414089	0.414967
524	0.396737	0.382583	0.365161	0.352953	0.340325	0.328542	0.32038		524	0.39656	0.382424	0.373178	0.364929	0.356252	0.348102	0.341179		524	0.397266	0.389365	0.389562	0.387782	0.385841	0.383539	0.380699		524	0.397573	0.400187	0.398826	0.398423	0.398936	0.399736	0.400817
522	0.382936	0.370211	0.353857	0.342632	0.331381	0.320664	0.314022		522	0.382607	0.369583	0.36098	0.353299	0.345607	0.338383	0.332176		522	0.383479	0.375885	0.376547	0.374956	0.373276	0.371324	0.368756		522	0.383613	0.386356	0.384942	0.384491	0.385169	0.385827	0.386792
520	0.369725	0.357961	0.342581	0.332629	0.322729	0.313123	0.308041		520	0.369144	0.35688	0.349166	0.342298	0.335222	0.328754	0.323475		520	0.37004	0.362913	0.363869	0.362655	0.361276	0.359625	0.357267		520	0.370226	0.373103	0.371445	0.37111	0.371691	0.3724	0.3733
518	0.356475	0.345917	0.331608	0.322736	0.314247	0.305775	0.301968		518	0.356124	0.34482	0.33798	0.331743	0.325425	0.319747	0.315212		518	0.356996	0.35033	0.351459	0.350506	0.349415	0.348099	0.345893		518	0.357096	0.360043	0.35834	0.358081	0.358557	0.359237	0.360252
516	0.343743	0.33455	0.32114	0.313412	0.306014	0.298897	0.296176		516	0.343478	0.333226	0.327072	0.321472	0.315767	0.311006	0.307198		516	0.344201	0.338081	0.339445	0.33874	0.337813	0.337033	0.334986		516	0.34438	0.347347	0.345759	0.345318	0.345879	0.346433	0.347472
514	0.331579	0.323551	0.311149	0.304473	0.297988	0.291968	0.290627		514	0.331293	0.321872	0.316342	0.311657	0.306543	0.302457	0.299467		514	0.331923	0.326341	0.327803	0.327513	0.326805	0.326184	0.324519		514	0.332136	0.335049	0.333512	0.333167	0.333555	0.334118	0.335199
512	0.319809	0.312945	0.301461	0.295809	0.290346	0.285381	0.285331		512	0.319592	0.310976	0.306199	0.302021	0.297775	0.294232	0.291908		512	0.320155	0.314939	0.316798	0.316656	0.316298	0.315652	0.314382		512	0.320197	0.323271	0.321679	0.321597	0.321673	0.322409	0.323484
510	0.308468	0.302754	0.292091	0.28735	0.283034	0.279077	0.280248		510	0.308296	0.300568	0.296489	0.292771	0.289318	0.286455	0.28481		510	0.308925	0.303744	0.306129	0.306095	0.306074	0.305579	0.30472		510	0.308762	0.312042	0.310362	0.310243	0.31029	0.311065	0.31225
508	0.297798	0.293154	0.283241	0.279341	0.276067	0.273014	0.275395		508	0.297406	0.29044	0.287081	0.284072	0.281268	0.278913	0.278042		508	0.298239	0.293386	0.295908	0.296194	0.29641	0.296255	0.295492		508	0.298127	0.301339	0.299659	0.299363	0.299632	0.300392	0.301471
506	0.287319	0.283709	0.274709	0.271782	0.269267	0.267115	0.270436		506	0.287203	0.28068	0.278105	0.275711	0.273611	0.271699	0.271475		506	0.287846	0.283474	0.285948	0.286647	0.286942	0.287297	0.286427		506	0.287679	0.290847	0.289265	0.289062	0.289275	0.289889	0.290993
504	0.277033	0.274435	0.266472	0.264138	0.262647	0.261307	0.265567		504	0.277335	0.271466	0.269447	0.26753	0.265965	0.264765	0.265176		504	0.277685	0.273715	0.276448	0.277188	0.277695	0.278212	0.277813		504	0.277513	0.280577	0.279199	0.27896	0.279173	0.279817	0.280866
502	0.26747	0.265909	0.258427	0.256896	0.256323	0.255747	0.26102		502	0.26761	0.262498	0.260913	0.259614	0.258356	0.257962	0.258841		502	0.267996	0.264273	0.267412	0.268338	0.269039	0.269587	0.269575		502	0.267871	0.270958	0.269659	0.269166	0.269511	0.270283	0.27117
500	0.258017	0.25731	0.250491	0.249834	0.250025	0.250117	0.256336		500	0.258167	0.253352	0.252441	0.251808	0.250818	0.251279	0.25259		500	0.2584	0.254996	0.258313	0.259567	0.260581	0.261326	0.261309		500	0.258341	0.261664	0.260138	0.259609	0.260071	0.260547	0.261731
498	0.248488	0.248526	0.242366	0.242494	0.243415	0.244331	0.251328		498	0.248884	0.244726	0.244248	0.24398	0.243558	0.244451	0.246336		498	0.248804	0.245698	0.249226	0.250627	0.251767	0.252782	0.252896		498	0.248866	0.252344	0.250578	0.250164	0.250541	0.250938	0.252444
496	0.239159	0.239761	0.234314	0.235133	0.236773	0.23854	0.246299		496	0.239738	0.236378	0.236149	0.236179	0.236616	0.237855	0.240034		496	0.239532	0.236591	0.240254	0.241938	0.243373	0.244428	0.244657		496	0.23952	0.24276	0.241298	0.240949	0.241233	0.241709	0.243115
494	0.230304	0.231837	0.227051	0.228414	0.23052	0.232893	0.2416		494	0.230739	0.227861	0.228239	0.228783	0.22952	0.231355	0.233785		494	0.230507	0.228184	0.231906	0.233726	0.23538	0.23661	0.237041		494	0.23053	0.233797	0.232661	0.23219	0.232631	0.232923	0.234213
492	0.221694	0.22417	0.219632	0.221561	0.224295	0.22717	0.236585		492	0.22221	0.219522	0.220685	0.221596	0.222683	0.224974	0.227857		492	0.221891	0.219803	0.223826	0.225794	0.227177	0.228698	0.229435		492	0.221795	0.225229	0.224001	0.223651	0.223872	0.224222	0.225487
490	0.213277	0.216318	0.21235	0.214796	0.218438	0.221668	0.231608		490	0.213812	0.211639	0.213117	0.214433	0.216162	0.21842	0.221938		490	0.213729	0.211716	0.215773	0.218085	0.219666	0.221038	0.221828		490	0.213754	0.216746	0.215576	0.215166	0.215557	0.215929	0.216985
488	0.205248	0.208856	0.205408	0.208409	0.212485	0.216326	0.226885		488	0.205703	0.204327	0.205848	0.207607	0.209877	0.212224	0.216057		488	0.205992	0.203868	0.208211	0.210589	0.212356	0.213777	0.214863		488	0.206	0.208799	0.207623	0.207161	0.207815	0.208091	0.209228
486	0.19787	0.201802	0.198759	0.202319	0.206544	0.211151	0.222011		486	0.197984	0.197199	0.198914	0.200983	0.203381	0.206287	0.210451		486	0.198183	0.196452	0.200739	0.203134	0.205279	0.20716	0.2083		486	0.198043	0.20133	0.199614	0.199772	0.199985	0.200455	0.201896
484	0.190715	0.195112	0.192454	0.196406	0.200909	0.206002	0.217424		484	0.190475	0.189886	0.192367	0.194626	0.197124	0.200541	0.204849		484	0.190727	0.189461	0.193898	0.196321	0.198667	0.200704	0.201883		484	0.190752	0.194226	0.192364	0.1925	0.192893	0.193214	0.194455
482	0.183282	0.18827	0.186122	0.190261	0.195579	0.2009	0.212558		482	0.183516	0.183225	0.186159	0.18853	0.191565	0.194876	0.199348		482	0.183492	0.182454	0.187103	0.189341	0.191753	0.193889	0.195045		482	0.183551	0.18696	0.185275	0.185162	0.186008	0.186165	0.187155
480	0.176475	0.182048	0.180242	0.184642	0.190425	0.195663	0.207994		480	0.176897	0.177059	0.179799	0.182584	0.185766	0.189361	0.194258		480	0.176765	0.175848	0.18077	0.18312	0.185411	0.187606	0.188679		480	0.176741	0.18005	0.178726	0.178303	0.179111	0.17925	0.180496
478	0.170403	0.176373	0.174958	0.179735	0.185598	0.191126	0.203965		478	0.171108	0.171427	0.174319	0.177287	0.180349	0.184577	0.189701		478	0.171008	0.170033	0.175151	0.177691	0.179928	0.182264	0.183467		478	0.170731	0.17404	0.17265	0.172368	0.173069	0.17334	0.174545
476	0.164544	0.171105	0.169817	0.175018	0.181013	0.186844	0.19982		476	0.165668	0.166042	0.16938	0.172239	0.175762	0.180001	0.185221		476	0.16521	0.164385	0.169588	0.172047	0.174632	0.176892	0.178345		476	0.165057	0.168446	0.166834	0.166776	0.16744	0.167831	0.168759
474	0.159312	0.166114	0.164841	0.170331	0.176464	0.182567	0.19561		474	0.160013	0.160664	0.16422	0.167391	0.171058	0.175394	0.180776		474	0.159756	0.159039	0.1643	0.166964	0.169201	0.171791	0.17343		474	0.159518	0.163145	0.161447	0.161391	0.161784	0.162418	0.163384
472	0.154092	0.16126	0.160344	0.165728	0.172311	0.178197	0.191705		472	0.154655	0.155635	0.159409	0.162796	0.166513	0.171218	0.176616		472	0.154511	0.15405	0.159562	0.16219	0.164362	0.167156	0.168786		472	0.154327	0.158137	0.156546	0.156474	0.156595	0.157324	0.158448
470	0.148988	0.156501	0.155663	0.161272	0.167985	0.17405	0.187814		470	0.149609	0.151036	0.154884	0.158351	0.162287	0.166996	0.172413		470	0.149415	0.149091	0.154621	0.157209	0.159748	0.162325	0.164077		470	0.149263	0.152968	0.151488	0.1515	0.151527	0.15232	0.153317
468	0.144384	0.152044	0.151355	0.157045	0.163746	0.170255	0.183834		468	0.14499	0.146612	0.150556	0.153995	0.15794	0.162838	0.168306		468	0.144683	0.144461	0.149808	0.152668	0.155302	0.157991	0.15982		468	0.144557	0.148219	0.146674	0.146762	0.14704	0.147476	0.148768
466	0.140262	0.148065	0.147496	0.153115	0.159935	0.166498	0.18019		466	0.140953	0.142595	0.146649	0.150099	0.154068	0.159031	0.16464		466	0.140305	0.140256	0.1457	0.148621	0.15127	0.154027	0.155676		466	0.140303	0.143922	0.142519	0.14264	0.142831	0.143329	0.144626
464	0.136356	0.144244	0.143736	0.149629	0.156426	0.163142	0.176599		464	0.136979	0.13886	0.142969	0.146488	0.150638	0.15562	0.161249		464	0.136487	0.136538	0.141957	0.145054	0.147481	0.150043	0.151729		464	0.1362	0.140075	0.138695	0.138752	0.138918	0.139607	0.140727
462	0.132611	0.141016	0.140358	0.146238	0.153004	0.159877	0.173109		462	0.133279	0.135148	0.139439	0.142986	0.147101	0.152251	0.158016		462	0.133182	0.132974	0.138228	0.141541	0.143992	0.146625	0.148315		462	0.132762	0.136498	0.135168	0.135171	0.135303	0.13582	0.137112
460	0.129031	0.137641	0.137198	0.142617	0.149552	0.156341	0.169609		460	0.129906	0.132078	0.136017	0.139775	0.143686	0.148936	0.15441		460	0.129449	0.129427	0.134749	0.137842	0.140427	0.143278	0.145092		460	0.129375	0.132854	0.131692	0.131494	0.131851	0.132509	0.133715
458	0.125677	0.134086	0.133728	0.13943	0.146151	0.152747	0.166117		458	0.126508	0.128948	0.132704	0.136596	0.140608	0.145642	0.151151		458	0.125862	0.126133	0.131498	0.134234	0.137007	0.139778	0.14169		458	0.125717	0.129391	0.128213	0.128027	0.128442	0.129282	0.130454
456	0.12227	0.130958	0.130448	0.13622	0.142897	0.14939	0.162796		456	0.123048	0.125582	0.129424	0.133355	0.137261	0.142054	0.14772		456	0.122803	0.123074	0.128221	0.131081	0.133756	0.136508	0.138417		456	0.122256	0.12593	0.125028	0.125004	0.125263	0.125694	0.12711
454	0.119293	0.128011	0.127405	0.133067	0.13969	0.146313	0.159489		454	0.119989	0.122348	0.12618	0.130041	0.134174	0.138762	0.144334		454	0.119715	0.119774	0.125231	0.128267	0.130765	0.133416	0.135558		454	0.119059	0.122809	0.121809	0.121766	0.122219	0.122639	0.123893
452	0.116405	0.125174	0.124717	0.130106	0.136738	0.143155	0.156202		452	0.117305	0.119634	0.123409	0.127353	0.131305	0.13608	0.141699		452	0.116633	0.116839	0.122617	0.125425	0.127969	0.130598	0.132349		452	0.116263	0.12012	0.119125	0.119017	0.119361	0.119996	0.12113
450	0.114023	0.122722	0.122132	0.127324	0.133941	0.140329	0.153178		450	0.114471	0.11695	0.120799	0.124516	0.128561	0.133428	0.138775		450	0.114115	0.114468	0.120042	0.12286	0.125415	0.128378	0.129739		450	0.113557	0.117644	0.11652	0.116763	0.117121	0.117796	0.118855
448	0.111689	0.120735	0.119694	0.125284	0.131317	0.137647	0.150379		448	0.112286	0.114829	0.118655	0.122483	0.126263	0.130957	0.136178		448	0.111926	0.112317	0.117615	0.12061	0.122932	0.125991	0.127661		448	0.111576	0.11544	0.114381	0.1143	0.114812	0.115379	0.116689
446	0.109506	0.118632	0.117751	0.122925	0.129016	0.135019	0.147884		446	0.110482	0.112732	0.116752	0.120643	0.124226	0.128455	0.134038		446	0.109831	0.110111	0.11557	0.118673	0.120918	0.123888	0.125703		446	0.109832	0.113459	0.112482	0.112289	0.112712	0.113563	0.115005
444	0.107402	0.116344	0.115403	0.120368	0.126542	0.132344	0.145293		444	0.108712	0.110993	0.114696	0.118334	0.122245	0.126522	0.131745		444	0.107947	0.107815	0.113541	0.116559	0.119166	0.121525	0.123334		444	0.107797	0.111467	0.110546	0.110334	0.110765	0.111432	0.112853
442	0.105747	0.11447	0.113415	0.118503	0.12445	0.129873	0.142428		442	0.106952	0.109035	0.112896	0.116249	0.119916	0.124665	0.129207		442	0.106344	0.106175	0.112075	0.114998	0.117582	0.119899	0.121705		442	0.106092	0.109954	0.10866	0.10856	0.109214	0.109812	0.111123
440	0.104379	0.113609	0.112233	0.11713	0.122938	0.128032	0.140005		440	0.10583	0.107992	0.111592	0.115212	0.118477	0.123203	0.127707		440	0.105052	0.10533	0.11116	0.114031	0.116325	0.118672	0.120339		440	0.104789	0.108954	0.107409	0.107808	0.108238	0.109025	0.110336
438	0.103884	0.113006	0.111518	0.116038	0.121862	0.12665	0.138105		438	0.104597	0.107081	0.110498	0.114391	0.117226	0.121662	0.126469		438	0.104467	0.104681	0.110559	0.11305	0.11574	0.118005	0.119602		438	0.104365	0.108227	0.107524	0.107062	0.107941	0.108844	0.109741
436	0.103334	0.111966	0.110439	0.115016	0.120504	0.125228	0.136673		436	0.104344	0.106134	0.109863	0.113741	0.116607	0.121034	0.125533		436	0.103839	0.103937	0.109597	0.112682	0.115078	0.117373	0.118928		436	0.103539	0.107279	0.106832	0.10639	0.107223	0.107863	0.108896
434	0.102859	0.111242	0.109918	0.113968	0.119126	0.124094	0.135403		434	0.1042	0.105837	0.109533	0.113002	0.116044	0.120405	0.124663		434	0.103296	0.103721	0.109255	0.111814	0.114589	0.116883	0.118286		434	0.103178	0.107227	0.10614	0.106305	0.10684	0.107566	0.108744
432	0.102807	0.111326	0.109835	0.113588	0.118462	0.123274	0.134037		432	0.104132	0.106175	0.10961	0.112878	0.115633	0.119856	0.124011		432	0.103486	0.103911	0.109328	0.111793	0.114792	0.116543	0.118326		432	0.103564	0.107179	0.106179	0.106401	0.106916	0.107846	0.109111
430	0.103509	0.111985	0.110287	0.113913	0.118322	0.122728	0.133081		430	0.104544	0.106536	0.109843	0.11294	0.115871	0.119915	0.124064		430	0.104289	0.104246	0.109809	0.11266	0.115044	0.11725	0.118814		430	0.103633	0.107586	0.106734	0.107102	0.107433	0.108151	0.109602
428	0.104194	0.112553	0.110592	0.114072	0.118261	0.122594	0.132567		428	0.105003	0.106813	0.110455	0.113497	0.116383	0.119767	0.124039		428	0.104714	0.10478	0.11042	0.113404	0.11515	0.11792	0.119316		428	0.103998	0.10843	0.107264	0.107867	0.108467	0.10901	0.11024
426	0.105078	0.11345	0.110887	0.114574	0.118277	0.122511	0.132677		426	0.105562	0.107664	0.110952	0.114216	0.117004	0.120217	0.124186		426	0.105337	0.105633	0.111217	0.114178	0.11618	0.118313	0.11968		426	0.105149	0.109355	0.108539	0.108974	0.109297	0.110235	0.111556
424	0.10605	0.114159	0.111701	0.115086	0.118458	0.122697	0.13191		424	0.106834	0.10895	0.112134	0.11512	0.117797	0.121151	0.124724		424	0.106495	0.106427	0.112242	0.115111	0.117132	0.119279	0.120522		424	0.106258	0.110621	0.109662	0.109943	0.110484	0.110972	0.112908
422	0.107563	0.115647	0.113157	0.115947	0.119506	0.123178	0.131708		422	0.108641	0.1106	0.11325	0.116169	0.118841	0.121993	0.125622		422	0.108053	0.108695	0.113883	0.116596	0.118925	0.120678	0.122081		422	0.107811	0.112168	0.111432	0.111672	0.112378	0.112462	0.114138
420	0.109568	0.117005	0.114777	0.117142	0.120697	0.124063	0.132453		420	0.110763	0.112807	0.115547	0.117829	0.120494	0.123835	0.127178		420	0.109721	0.110666	0.115485	0.118456	0.120409	0.122545	0.124019		420	0.110022	0.114248	0.113402	0.113509	0.11439	0.114754	0.116062
418	0.11164	0.119089	0.116305	0.118453	0.121651	0.124543	0.133014		418	0.113052	0.115136	0.117811	0.120109	0.122156	0.125471	0.128503		418	0.111911	0.11218	0.117898	0.120388	0.122235	0.124397	0.126175		418	0.111843	0.116001	0.115404	0.114989	0.116363	0.117082	0.118244
416	0.113992	0.121584	0.118523	0.12033	0.122873	0.125801	0.133857		416	0.115567	0.117153	0.120062	0.122155	0.123745	0.127018	0.129859		416	0.114412	0.114718	0.120299	0.122626	0.124662	0.126602	0.128029		416	0.114209	0.118207	0.11798	0.117865	0.118938	0.11962	0.120679
414	0.116661	0.123833	0.120945	0.122789	0.124813	0.127502	0.134705		414	0.118028	0.119302	0.121961	0.12418	0.125939	0.129085	0.131519		414	0.117221	0.117347	0.12291	0.125629	0.127286	0.129327	0.130561		414	0.117022	0.121411	0.120655	0.121057	0.12163	0.122194	0.123905
412	0.119701	0.12676	0.123599	0.124765	0.126996	0.129439	0.135625		412	0.120452	0.121947	0.124282	0.126362	0.128277	0.131024	0.13334		412	0.11996	0.120022	0.125422	0.128249	0.129889	0.131955	0.132879		412	0.119943	0.124158	0.123526	0.12408	0.124433	0.125339	0.126945
410	0.122796	0.129512	0.126154	0.127137	0.129039	0.1309	0.136925		410	0.123648	0.124885	0.127024	0.129018	0.130768	0.133068	0.135419		410	0.123088	0.123148	0.128607	0.131142	0.13268	0.134617	0.135816		410	0.12302	0.127202	0.126661	0.12741	0.127643	0.128549	0.130183
408	0.126242	0.13242	0.128992	0.129725	0.131343	0.132825	0.138848		408	0.126669	0.127603	0.129778	0.131728	0.133356	0.135381	0.137467		408	0.126626	0.126333	0.132167	0.13419	0.136277	0.137768	0.138951		408	0.125822	0.130696	0.130176	0.130576	0.131079	0.132051	0.13377
406	0.128848	0.135413	0.131457	0.131996	0.133296	0.134315	0.140284		406	0.129712	0.131077	0.133254	0.134633	0.136247	0.138079	0.139955		406	0.129638	0.129199	0.135156	0.137259	0.13898	0.140902	0.141918		406	0.128912	0.133828	0.132938	0.133401	0.134396	0.135218	0.136594
404	0.132541	0.138887	0.135393	0.135289	0.135756	0.136697	0.141988		404	0.133983	0.134923	0.137141	0.138789	0.140021	0.141966	0.143532		404	0.133366	0.133108	0.138483	0.141062	0.142681	0.144402	0.145255		404	0.133126	0.137718	0.136935	0.137289	0.13814	0.139123	0.140419
402	0.136563	0.142553	0.138313	0.138606	0.138849	0.139116	0.144377		402	0.137948	0.138411	0.140358	0.141707	0.142657	0.144636	0.146376		402	0.137572	0.137308	0.142308	0.144618	0.146183	0.148369	0.148659		402	0.137408	0.141738	0.141277	0.141886	0.142562	0.143602	0.145199
400	0.140875	0.146695	0.141759	0.141571	0.142236	0.141981	0.146517		400	0.142149	0.142581	0.144413	0.145488	0.146234	0.147728	0.149301		400	0.141471	0.141199	0.146575	0.148848	0.149868	0.152031	0.15231		400	0.141253	0.145864	0.145203	0.146103	0.146794	0.147658	0.148769

## Sheet: Section B Processed DCIP Dye
DCIP dye concentration determed from maximum in spectra, with extinction coefficient of									16398 cm-1
Absorbtion due to cuvette is			0.09
		Dye concentration mol /dm-3
	Time / mins	0	30	60	90	120	150	180		Rate / mol dm-3 min-1			Rate/ mol dm-3 min-1 cm-2
Area / cm2
3.88	HP-TiO2	4.97198e-05	4.7249e-05	4.52486e-05	4.31869e-05	4.04411e-05	3.77806e-05	3.40915e-05		-8.408e-08			2.16701e-08
4.75	D-TiO2	4.97674e-05	4.89837e-05	4.89317e-05	4.87847e-05	4.86441e-05	4.8296e-05	4.79824e-05		-8.355e-09			1.75895e-09
5.89	P-TiO2	4.96021e-05	4.78813e-05	4.67682e-05	4.58166e-05	4.45496e-05	4.32453e-05	4.17877e-05		-4.159e-08			7.06112e-09
	Blank	4.97915e-05	5.01207e-05	5.01982e-05	5.03234e-05	5.04535e-05	5.0632e-05	5.07721e-05		5.023e-09

## Sheet: Section B raw Stearic
HP-TiO2	Time / mins							P-TiO2		Time / mins										D-TiO2												Unocated Control
Wavenumber / cm-1	t0	t5	t10	t15	t20	t25		Wavenumber / cm-1	t0	t5	t10	t15	t20	t25	t30	t40	t50	t60		Wavenumber / cm-1	t0	t5	t10	t15	t20	t25	t30	t40	t50	t60		Wavenumber / cm-1	t0	t5	t10	t15	t20	t25	t30	t40	t50	t60
3000	0.00415361	0.00347618	0.0023069	0.00179875	0.00171223	0.00202069		2800	0.000609375	-0.0001875	-0.000734375	1.5625e-05	0.0005	0.00034375	-0.000109375	-0.0001875	-0.000265625	7.8125e-05		2802.5	0.006025	0.00585	0.005225	0.004975	0.004425	0.00655	0.005325	0.00495	0.002275	0.00415		2802.5	0.006675	0.005825	0.008875	0.0037	0.0042	0.00515	0.00475	0.00435	0.002375	0.003825
2999	0.00433568	0.00346323	0.00220011	0.00179278	0.00160801	0.00191734		2802.5	-0.000475	-0.00025	-0.000625	-0.000175	-0.00055	-0.00055	-0.000775	-0.00035	-0.000625	-0.000175		2806.5	0.00615	0.005775	0.00525	0.0048	0.004	0.00665	0.0049	0.004125	0.002475	0.00395		2806.5	0.00665	0.0058	0.009025	0.004025	0.00445	0.0051	0.0048	0.0046	0.002525	0.00375
2998	0.00461775	0.00345028	0.00199333	0.0018868	0.00150379	0.00191398		2806.5	-0.000975	0.0003	0.001175	-2.5e-05	-0.0008	-0.00055	0.000175	0.0003	0.000425	-0.000125		2810.5	0.0063	0.00585	0.004875	0.00495	0.00385	0.00735	0.005175	0.00415	0.0028	0.00395		2810.5	0.00635	0.0058	0.008675	0.003475	0.00425	0.00515	0.004275	0.0044	0.001775	0.003075
2997	0.00469982	0.00363733	0.00208654	0.00218083	0.00159957	0.00191063		2810.5	-7.5e-05	0.00075	0.002075	-7.5e-05	0	0.00045	0.001425	0.0003	0.001375	0.000125		2814.5	0.005775	0.005775	0.0049	0.00445	0.00395	0.007225	0.005575	0.0042	0.002875	0.003875		2814.5	0.006925	0.006075	0.009225	0.00365	0.00465	0.005525	0.004625	0.00445	0.002475	0.003575
2996	0.0045819	0.00362438	0.00207976	0.00217486	0.00159534	0.00180728		2814.5	0.002725	0.0012	0.002325	0.000575	0.00085	0.00225	0.002325	0.0018	0.002125	0.000675		2818.5	0.00605	0.005875	0.005075	0.004775	0.004125	0.006925	0.0056	0.004625	0.0026	0.003975		2818.5	0.0068	0.0062	0.009125	0.0038	0.0046	0.005475	0.005	0.004775	0.002575	0.003775
2995	0.00446397	0.00371143	0.00237297	0.00236889	0.00169112	0.00180392		2818.5	0.003225	0.00125	0.001625	0.000825	0.00025	0.00155	0.001525	0.00195	0.001725	-0.000125		2822.5	0.00645	0.006725	0.004925	0.005425	0.0042	0.006925	0.00565	0.004575	0.002525	0.004275		2822.5	0.00675	0.0064	0.00915	0.0041	0.0046	0.00555	0.00485	0.004475	0.0027	0.00385
2994	0.00444604	0.00379848	0.00266619	0.00246292	0.0017869	0.00180057		2822.5	0.002875	0.0016	0.003025	0.001625	0.00105	0.00145	0.001725	0.0021	0.001875	-2.5e-05		2826.5	0.006475	0.007025	0.005475	0.005325	0.00475	0.007125	0.0054	0.00465	0.002725	0.004775		2826.5	0.006425	0.006425	0.00855	0.004225	0.0047	0.005625	0.00485	0.00435	0.00245	0.003825
2993	0.00422812	0.00368553	0.00255941	0.00235695	0.00168268	0.00179722		2826.5	0.004825	0.0037	0.006125	0.003675	0.00345	0.00395	0.003875	0.0043	0.003825	0.002025		2830.5	0.0072	0.0072	0.005725	0.006125	0.005425	0.007425	0.005875	0.005175	0.0032	0.0045		2830.5	0.006575	0.006325	0.008975	0.004175	0.004725	0.005625	0.0047	0.004825	0.002425	0.0039
2992	0.00421019	0.00357258	0.00245262	0.00225098	0.00167846	0.00179386		2830.5	0.006375	0.0047	0.006825	0.004475	0.0036	0.00495	0.004725	0.00455	0.004475	0.001875		2834.5	0.007	0.00745	0.006375	0.00595	0.005925	0.007475	0.0065	0.005875	0.003725	0.004575		2834.5	0.006775	0.006225	0.00925	0.0041	0.00515	0.0056	0.004975	0.005075	0.003075	0.004075
2991	0.00419226	0.00345963	0.00224584	0.00204501	0.00167424	0.00169051		2834.5	0.008675	0.0059	0.007775	0.005925	0.00505	0.0061	0.005775	0.00525	0.004775	0.000475		2838.5	0.007575	0.0076	0.006	0.005625	0.005475	0.00805	0.006725	0.005675	0.003575	0.0043		2838.5	0.0078	0.00725	0.010275	0.005	0.005475	0.00645	0.005525	0.0057	0.003325	0.005025
2990	0.00427433	0.00334668	0.00203905	0.00203904	0.00157002	0.00158716		2838.5	0.014525	0.01075	0.012875	0.010575	0.00885	0.01065	0.009725	0.00845	0.007725	0.000975		2842.5	0.009675	0.0096	0.0085	0.0083	0.007175	0.00965	0.0086	0.007675	0.00515	0.006625		2842.5	0.00875	0.00835	0.01115	0.00615	0.006725	0.0078	0.006825	0.006375	0.0044	0.00575
2989	0.00435641	0.00343374	0.00213227	0.00213307	0.0016658	0.0014838		2842.5	0.027275	0.0227	0.023225	0.018575	0.0155	0.01775	0.016275	0.01285	0.012025	0.004775		2846.5	0.0152	0.01555	0.01355	0.013125	0.012225	0.015075	0.013625	0.011775	0.009575	0.01115		2846.5	0.013175	0.013325	0.0157	0.0103	0.01085	0.011825	0.011025	0.010675	0.008575	0.0095
2988	0.00433848	0.00332079	0.00222548	0.00232709	0.00176158	0.00148045		2846.5	0.036275	0.0323	0.029875	0.024425	0.0205	0.0209	0.018775	0.0146	0.013125	0.006875		2850.5	0.01555	0.016575	0.014625	0.01455	0.013225	0.016	0.0148	0.012525	0.011125	0.011925		2850.5	0.01495	0.014275	0.01705	0.011875	0.011775	0.013525	0.012525	0.0128	0.010175	0.011475
2987	0.00432055	0.00320784	0.0023187	0.00242112	0.00185736	0.00167709		2850.5	0.030375	0.0272	0.026825	0.022325	0.0188	0.0184	0.015725	0.0116	0.010325	0.004025		2854.5	0.00975	0.010075	0.008575	0.00875	0.007525	0.0106	0.00875	0.007825	0.0067	0.006425		2854.5	0.0104	0.0101	0.012125	0.00745	0.007975	0.008975	0.008375	0.008625	0.00645	0.007525
2986	0.00440263	0.00309489	0.00241191	0.00241515	0.00195314	0.00177374		2854.5	0.020675	0.018	0.020975	0.017925	0.01475	0.01465	0.013175	0.0097	0.008975	0.002525		2858.5	0.007775	0.007675	0.006525	0.0069	0.006125	0.00835	0.0074	0.00615	0.00405	0.005775		2858.5	0.00855	0.00815	0.0107	0.005725	0.006225	0.00735	0.006525	0.007075	0.00475	0.005725
2985	0.0043847	0.00318194	0.00250513	0.00240918	0.00194892	0.00177039		2858.5	0.015475	0.01435	0.016675	0.015475	0.01285	0.013	0.013175	0.0099	0.010875	0.004125		2862.5	0.007175	0.00655	0.0054	0.005725	0.005475	0.006875	0.0061	0.005025	0.0031	0.004875		2862.5	0.008325	0.007675	0.0107	0.0053	0.00595	0.007	0.006375	0.00645	0.004525	0.00535
2984	0.00436677	0.00326899	0.00239834	0.00220321	0.0019447	0.00146703		2862.5	0.013675	0.0129	0.014975	0.013925	0.01235	0.01275	0.012875	0.01035	0.012825	0.005725		2866.5	0.007025	0.00665	0.00585	0.00525	0.0049	0.0072	0.0061	0.00535	0.003075	0.00455		2866.5	0.0074	0.0066	0.0096	0.005	0.005075	0.00605	0.00565	0.005525	0.0033	0.004625
2983	0.00434884	0.00335604	0.00229156	0.00189724	0.00184048	0.00106368		2866.5	0.013025	0.0112	0.013925	0.012275	0.0106	0.01195	0.011625	0.01095	0.012375	0.005275		2870.5	0.00665	0.0069	0.005425	0.004825	0.00505	0.006475	0.005825	0.0055	0.0032	0.005325		2870.5	0.0073	0.007125	0.00965	0.005125	0.005175	0.005775	0.005575	0.00555	0.003225	0.0047
2982	0.00433092	0.00334309	0.00218478	0.00169127	0.00183626	0.000960328		2870.5	0.011675	0.00965	0.011525	0.010275	0.00865	0.0105	0.010575	0.01025	0.010075	0.002325		2874.5	0.007325	0.0077	0.00625	0.005525	0.005575	0.007225	0.00665	0.005975	0.003225	0.005625		2874.5	0.00705	0.00675	0.009675	0.004675	0.005175	0.005575	0.0059	0.005775	0.003175	0.004575
2981	0.00441299	0.00343014	0.00217799	0.0017853	0.00193204	0.00105697		2874.5	0.010725	0.00885	0.011525	0.010325	0.0083	0.0109	0.010775	0.00935	0.009575	0.000475		2878.5	0.007425	0.007725	0.00635	0.006175	0.005875	0.007125	0.007	0.0058	0.00335	0.005125		2878.5	0.0074	0.006525	0.0096	0.004775	0.005325	0.006125	0.005625	0.0056	0.003225	0.004925
2980	0.00449506	0.00351719	0.00227121	0.00197933	0.00222782	0.00135362		2878.5	0.010625	0.0102	0.014375	0.011425	0.00945	0.01335	0.012025	0.0095	0.010825	0.002325		2882.5	0.0072	0.007775	0.006175	0.006475	0.006	0.0075	0.006625	0.005325	0.0035	0.005375		2882.5	0.007075	0.006625	0.00935	0.0046	0.005325	0.0063	0.005825	0.0055	0.00305	0.0045
2979	0.00477714	0.00360425	0.00236442	0.00227336	0.0025236	0.00185027		2882.5	0.010775	0.01085	0.015125	0.011325	0.0096	0.01375	0.011475	0.0089	0.010275	0.003175		2886.5	0.0079	0.008475	0.007025	0.007325	0.006125	0.008275	0.00715	0.006475	0.004875	0.005775		2886.5	0.007825	0.007275	0.01055	0.00505	0.0058	0.007	0.006225	0.0057	0.00375	0.005125
2978	0.00475921	0.0035913	0.00225764	0.00226738	0.00251938	0.00204691		2886.5	0.012575	0.01165	0.015375	0.012775	0.0107	0.01505	0.011325	0.0095	0.011125	0.002575		2890.5	0.00835	0.0088	0.007175	0.007425	0.0062	0.008425	0.007525	0.006525	0.005325	0.0058		2890.5	0.008125	0.007575	0.01065	0.005225	0.006	0.007025	0.0062	0.006375	0.00435	0.005725
2977	0.00464128	0.00357835	0.00215085	0.00216141	0.00241516	0.00204356		2890.5	0.015575	0.01535	0.017125	0.014975	0.0139	0.01615	0.012525	0.01215	0.013925	0.003325		2894.5	0.008125	0.0087	0.006725	0.00685	0.006275	0.00845	0.00685	0.00605	0.0048	0.006325		2894.5	0.008525	0.007925	0.010925	0.00545	0.006425	0.0072	0.0068	0.00685	0.00465	0.006225
2976	0.00462335	0.0036654	0.00224407	0.00195544	0.00231094	0.00214021		2894.5	0.017775	0.01725	0.018525	0.015875	0.01545	0.01635	0.014125	0.01405	0.014825	0.004025		2898.5	0.00925	0.0089	0.00765	0.00755	0.006475	0.009475	0.00735	0.006625	0.004775	0.00665		2898.5	0.00885	0.008275	0.0113	0.006425	0.0067	0.007875	0.00725	0.007475	0.005025	0.0061
2975	0.00470543	0.00365245	0.00233728	0.00184947	0.00210672	0.00193685		2898.5	0.019975	0.01875	0.020825	0.018525	0.0162	0.01785	0.016975	0.0149	0.015075	0.003925		2902.5	0.00915	0.0096	0.00815	0.008475	0.007075	0.009125	0.008325	0.0068	0.005025	0.00695		2902.5	0.00925	0.008775	0.01215	0.0068	0.0081	0.008675	0.007775	0.008075	0.005675	0.006575
2974	0.0048875	0.0039395	0.0025305	0.0019435	0.0021025	0.0019335		2902.5	0.025025	0.024	0.026075	0.023325	0.0193	0.0213	0.019975	0.0162	0.017025	0.004725		2906.5	0.009975	0.010775	0.0094	0.009175	0.008025	0.01095	0.009375	0.008225	0.00665	0.0076		2906.5	0.0105	0.010125	0.013125	0.00825	0.0089	0.0097	0.00885	0.009275	0.006875	0.008075
2973	0.00506957	0.00442655	0.00282372	0.00243753	0.00209828	0.00173015		2906.5	0.035925	0.03415	0.034725	0.030725	0.0263	0.02715	0.025425	0.021	0.021475	0.008025		2910.5	0.01365	0.0137	0.012075	0.01265	0.011	0.0137	0.0118	0.010925	0.009175	0.010425		2910.5	0.0127	0.012375	0.0156	0.01045	0.010825	0.011875	0.01075	0.01085	0.009075	0.0105
2972	0.00525165	0.0047136	0.00281693	0.00283156	0.00199406	0.00152679		2910.5	0.052875	0.04955	0.047525	0.042125	0.03645	0.035	0.033425	0.02725	0.026625	0.012025		2914.5	0.019975	0.019725	0.018575	0.017775	0.01635	0.01845	0.01715	0.0159	0.013625	0.01525		2914.5	0.0179	0.016625	0.020425	0.015375	0.0154	0.016575	0.015675	0.01555	0.013575	0.01525
2971	0.00553372	0.00490065	0.00291015	0.00322559	0.00198984	0.00162344		2914.5	0.066725	0.06235	0.057775	0.052425	0.0444	0.04295	0.039225	0.03	0.029925	0.014675		2918.5	0.020275	0.0197	0.0179	0.017825	0.016725	0.018575	0.0175	0.01595	0.013925	0.014375		2918.5	0.0178	0.01685	0.02035	0.015375	0.015925	0.016775	0.016125	0.0165	0.014375	0.015725
2970	0.00561579	0.0047877	0.00290336	0.00311962	0.00178562	0.00172009		2918.5	0.064475	0.06095	0.057375	0.052675	0.0461	0.04365	0.039175	0.03055	0.029775	0.014175		2922.5	0.013125	0.013625	0.0117	0.01205	0.011075	0.013025	0.0118	0.0106	0.00865	0.00985		2922.5	0.013525	0.012625	0.016075	0.01105	0.0115	0.012475	0.012025	0.01255	0.010275	0.011225
2969	0.00559786	0.00457475	0.00289658	0.00281364	0.0015814	0.00181673		2922.5	0.050975	0.0481	0.050525	0.045775	0.04085	0.03855	0.035475	0.0307	0.026925	0.011925		2926.5	0.009725	0.00995	0.0076	0.0086	0.007875	0.00965	0.008175	0.0081	0.0056	0.006375		2926.5	0.0106	0.009625	0.0134	0.008125	0.0089	0.009825	0.008625	0.009425	0.006975	0.008475
2968	0.00587994	0.00476181	0.00328979	0.00270767	0.00167718	0.00201338		2926.5	0.035725	0.0344	0.040925	0.037925	0.03265	0.03275	0.029075	0.0265	0.023725	0.008475		2930.5	0.0081	0.0089	0.006375	0.007725	0.006975	0.00815	0.0076	0.006475	0.004725	0.00555		2930.5	0.0087	0.008225	0.01155	0.006675	0.00735	0.00805	0.00725	0.0078	0.00545	0.006975
2967	0.00626201	0.00514886	0.00368301	0.0029017	0.00187296	0.00211003		2930.5	0.024125	0.0256	0.031325	0.029775	0.0257	0.0283	0.022825	0.02045	0.021625	0.004525		2934.5	0.007225	0.00755	0.00585	0.00645	0.006625	0.008	0.00725	0.00615	0.004475	0.0054		2934.5	0.00795	0.00785	0.01095	0.005825	0.006325	0.007475	0.007025	0.00685	0.005125	0.006825
2966	0.00694408	0.00573591	0.00417622	0.00349573	0.00226874	0.00230667		2934.5	0.017175	0.01885	0.023475	0.022575	0.0202	0.02375	0.019575	0.01735	0.019675	0.003625		2938.5	0.00635	0.0065	0.0055	0.005875	0.00525	0.007175	0.0075	0.005725	0.0036	0.0055		2938.5	0.007825	0.00745	0.0102	0.005625	0.0059	0.007275	0.006525	0.006575	0.004775	0.006075
2965	0.00752616	0.00642296	0.00466944	0.00408976	0.00266452	0.00250332		2938.5	0.011925	0.01275	0.017375	0.017875	0.0159	0.0179	0.016675	0.01595	0.017975	0.003625		2942.5	0.006325	0.006225	0.0052	0.005025	0.0042	0.0066	0.00615	0.0053	0.00305	0.00495		2942.5	0.007025	0.006775	0.009825	0.005075	0.00585	0.00615	0.0059	0.006375	0.00405	0.005625
2964	0.00790823	0.00691001	0.00486266	0.00448379	0.0028603	0.00259997		2942.5	0.010825	0.01155	0.015925	0.016325	0.014	0.0161	0.016225	0.01645	0.018725	0.003475		2946.5	0.005	0.00605	0.004825	0.00515	0.003575	0.006	0.0055	0.00455	0.002925	0.004075		2946.5	0.0073	0.0067	0.010125	0.005575	0.005725	0.006575	0.005925	0.006275	0.00435	0.0054
2963	0.0079903	0.00729706	0.00495587	0.00457782	0.00295608	0.00259661		2946.5	0.011775	0.0127	0.017875	0.015525	0.01455	0.0182	0.017625	0.01755	0.020475	0.004575		2950.5	0.005375	0.0065	0.0052	0.00535	0.004025	0.00685	0.00575	0.004625	0.0031	0.0053		2950.5	0.00775	0.007075	0.010725	0.005675	0.005775	0.006725	0.006675	0.00635	0.0047	0.006175
2962	0.00787237	0.00738411	0.00494909	0.00447185	0.00285186	0.00239326		2950.5	0.011425	0.013	0.018825	0.014975	0.01465	0.0189	0.017625	0.016	0.019575	0.004375		2954.5	0.006225	0.007075	0.00565	0.0059	0.005275	0.007475	0.005925	0.005175	0.003675	0.0053		2954.5	0.008	0.007325	0.010675	0.006	0.006475	0.007325	0.00685	0.00675	0.00505	0.0066
2961	0.00785445	0.00747116	0.0052423	0.00446588	0.00294764	0.00228991		2954.5	0.010275	0.0139	0.018925	0.016375	0.01555	0.01875	0.017075	0.0147	0.018975	0.003875		2958.5	0.005475	0.006375	0.0056	0.005125	0.00495	0.007175	0.005925	0.004625	0.003625	0.00495		2958.5	0.007775	0.0076	0.0106	0.005825	0.006675	0.006925	0.0067	0.0072	0.0051	0.00645
2960	0.00793652	0.00745821	0.00553552	0.00435991	0.00294342	0.00228655		2958.5	0.010175	0.0143	0.020025	0.017975	0.0164	0.01935	0.016775	0.0171	0.020225	0.005375		2962.5	0.005075	0.0064	0.004925	0.005175	0.004125	0.006275	0.005425	0.004575	0.0033	0.00455		2962.5	0.006825	0.00705	0.01005	0.00575	0.006	0.006725	0.006475	0.007	0.00465	0.006
2959	0.00821859	0.00734526	0.00572873	0.00445393	0.0029392	0.0023832		2962.5	0.008775	0.01225	0.019075	0.016775	0.0146	0.01845	0.015975	0.0191	0.020425	0.004975		2966.5	0.0043	0.0053	0.003775	0.004975	0.003625	0.00565	0.00425	0.004275	0.002425	0.00335		2966.5	0.006425	0.0063	0.009875	0.004925	0.0057	0.006225	0.006375	0.006275	0.004175	0.005475
2958	0.00840067	0.00713232	0.00572195	0.00454796	0.00303498	0.00247984		2966.5	0.005125	0.00845	0.014525	0.013025	0.01195	0.017	0.013725	0.017	0.018775	0.002425		2970.5	0.00545	0.005175	0.004075	0.004825	0.00365	0.005775	0.004525	0.0045	0.00225	0.0035		2970.5	0.0066	0.0056	0.0095	0.004325	0.005025	0.00535	0.005625	0.0058	0.003625	0.005025
2957	0.00858274	0.00701937	0.00571516	0.00464199	0.00323076	0.00257649		2970.5	0.003175	0.0062	0.012325	0.011125	0.0107	0.01735	0.013625	0.0152	0.018125	0.002575		2974.5	0.004425	0.0053	0.004275	0.003825	0.003125	0.004625	0.004825	0.003675	0.001925	0.0031		2974.5	0.0059	0.00565	0.009025	0.00405	0.00455	0.005525	0.004875	0.005275	0.003075	0.0047
2956	0.00866481	0.00690642	0.00570838	0.00473602	0.00332654	0.00267314		2974.5	0.002325	0.006	0.013125	0.010425	0.01065	0.01675	0.014525	0.01485	0.019875	0.003525		2978.5	0.004125	0.0057	0.0047	0.00425	0.003275	0.0055	0.00525	0.0038	0.0021	0.003025		2978.5	0.0066	0.0063	0.009375	0.00415	0.00465	0.00565	0.00545	0.0055	0.003275	0.0055
2955	0.00854688	0.00679347	0.00570159	0.00463005	0.00332232	0.00276978		2978.5	0.002225	0.00715	0.013075	0.010125	0.0114	0.01425	0.014425	0.0148	0.020825	0.003175		2982.5	0.00395	0.00525	0.00375	0.003925	0.00285	0.005325	0.004825	0.003675	0.001775	0.002625		2982.5	0.0062	0.006175	0.00935	0.0046	0.00535	0.005825	0.005725	0.005575	0.003275	0.0052
2954	0.00822896	0.00658052	0.00569481	0.00432408	0.0031181	0.00276643		2982.5	0.001925	0.0065	0.012425	0.010375	0.01	0.0129	0.013975	0.01455	0.020125	0.001875		2986.5	0.004425	0.0052	0.00355	0.0039	0.00315	0.005	0.0044	0.004025	0.00195	0.00315		2986.5	0.00585	0.0061	0.0094	0.004575	0.0049	0.005575	0.0054	0.005025	0.00345	0.005025
2953	0.00771103	0.00626757	0.00548803	0.00391811	0.00261388	0.00266308		2986.5	0.000675	0.0053	0.013025	0.010475	0.00835	0.0136	0.013125	0.01475	0.020575	0.001225		2990.5	0.004225	0.00525	0.003825	0.004175	0.003675	0.0046	0.004625	0.003825	0.00235	0.00315		2990.5	0.006275	0.005825	0.0094	0.0045	0.005125	0.005475	0.004925	0.005575	0.00355	0.004975
2952	0.0073931	0.00615462	0.00538124	0.00371214	0.00230966	0.00245972		2990.5	0.000275	0.00645	0.013525	0.010925	0.0094	0.0141	0.013575	0.0159	0.021675	0.001775		2994.5	0.004825	0.0052	0.0042	0.004475	0.004175	0.0054	0.0043	0.004025	0.002675	0.004125		2994.5	0.006075	0.0061	0.00965	0.0045	0.0048	0.00575	0.00545	0.0053	0.00385	0.004775
2951	0.00717518	0.00614167	0.00517446	0.00370617	0.00200543	0.00235637		2994.5	-0.000575	0.0056	0.012675	0.008975	0.00925	0.0133	0.012675	0.01355	0.019525	0.000925		2998.5	0.004725	0.0052	0.003925	0.004175	0.00395	0.00515	0.004575	0.0043	0.00255	0.003		2998.5	0.006125	0.005925	0.009225	0.004725	0.005075	0.005475	0.0054	0.0054	0.00385	0.0053
2950	0.00715725	0.00612872	0.00486767	0.0038002	0.00190121	0.00235302		2998.5
2949	0.00753932	0.00641577	0.00476089	0.00409422	0.00219699	0.00254966			0.772134	0.770962	0.915791	0.796441	0.69915	0.794194	0.723616	0.654463	0.716309	0.191203
2948	0.00792139	0.00660282	0.0047541	0.00438825	0.00249277	0.00284631
2947	0.00810347	0.00698988	0.00504732	0.00458228	0.00288855	0.00314296
2946	0.00828554	0.00727693	0.00554053	0.00457631	0.00308433	0.0033396
2945	0.00836761	0.00746398	0.00603375	0.00457034	0.00318011	0.00313625
2944	0.00854969	0.00775103	0.00652697	0.00466437	0.00317589	0.0029329
2943	0.00873176	0.00783808	0.00662018	0.0046584	0.00297167	0.00242954
2942	0.00911383	0.00812513	0.0065134	0.00485243	0.00276745	0.00212619
2941	0.00959591	0.00851218	0.00660661	0.00514646	0.00266323	0.00212284
2940	0.010078	0.00889923	0.00659983	0.00534049	0.00255901	0.00221948
2939	0.0105601	0.00918628	0.00659304	0.00553451	0.00255479	0.00221613
2938	0.0111421	0.00957333	0.00668626	0.00582854	0.00275057	0.00241278
2937	0.0119242	0.0103604	0.00717947	0.00612257	0.00324635	0.00260942
2936	0.0129063	0.0113474	0.00787269	0.0066166	0.00384213	0.00300607
2935	0.0139883	0.0125345	0.00866591	0.00701063	0.00443791	0.00330272
2934	0.0150704	0.0136215	0.00935912	0.00720466	0.00473369	0.00349936
2933	0.0159525	0.0146086	0.00995234	0.00749869	0.00472947	0.00359601
2932	0.0167346	0.0152956	0.0105456	0.00769272	0.00472525	0.00359266
2931	0.0175166	0.0158827	0.0109388	0.00768675	0.00472103	0.0034893
2930	0.0185987	0.0164697	0.011632	0.00798078	0.00491681	0.00348595
2929	0.0197808	0.0172568	0.0122252	0.0083748	0.00511259	0.00338259
2928	0.0210629	0.0180438	0.0128184	0.00886883	0.00540837	0.00327924
2927	0.0220449	0.0187309	0.0131116	0.00916286	0.00540415	0.00307589
2926	0.022927	0.0192179	0.0132048	0.00915689	0.00529993	0.00277253
2925	0.0235091	0.019405	0.0129981	0.00895092	0.00489571	0.00256918
2924	0.0241911	0.019492	0.0128913	0.00854495	0.00449149	0.00226583
2923	0.0249732	0.0195791	0.0127845	0.00833898	0.00428727	0.00216247
2922	0.0258553	0.0196661	0.0128777	0.00833301	0.00438305	0.00235912
2921	0.0263374	0.0194532	0.0126709	0.00832704	0.00467883	0.00265577
2920	0.0263194	0.0188403	0.0121641	0.00822107	0.00477461	0.00265241
2919	0.0259015	0.0181273	0.0116574	0.00791509	0.00467039	0.00264906
2918	0.0250836	0.0173144	0.0109506	0.00750912	0.00436617	0.00254571
2917	0.0242657	0.0165014	0.0103438	0.00710315	0.00426195	0.00254235
2916	0.0233477	0.0158885	0.009937	0.00689718	0.00425773	0.002639
2915	0.0221298	0.0150755	0.00943022	0.00669121	0.00425351	0.00263565
2914	0.0206119	0.0141626	0.00882343	0.00638524	0.00394929	0.00253229
2913	0.0189939	0.0132496	0.00841665	0.00617927	0.00364507	0.00242894
2912	0.017476	0.0123367	0.00800986	0.0058733	0.00334085	0.00252559
2911	0.0160581	0.0113237	0.00770308	0.00556733	0.00323663	0.00272223
2910	0.0149402	0.0106108	0.00749629	0.00536136	0.00333241	0.00301888
2909	0.0140222	0.00999781	0.00738951	0.00515538	0.00342819	0.00311553
2908	0.0132043	0.00958486	0.00708272	0.00514941	0.00332397	0.00291217
2907	0.0127864	0.00937191	0.00677594	0.00524344	0.00321975	0.00260882
2906	0.0123685	0.00895896	0.00646916	0.00523747	0.00301553	0.00220547
2905	0.0119505	0.00854601	0.00626237	0.0050315	0.0026113	0.00170211
2904	0.0116326	0.00843307	0.00625559	0.00482553	0.00250708	0.00159876
2903	0.0113147	0.00842012	0.0063488	0.00471956	0.00240286	0.00169541
2902	0.0109967	0.00830717	0.00624202	0.00461359	0.00249864	0.00179205
2901	0.0107788	0.00819422	0.00613523	0.00460762	0.00269442	0.0018887
2900	0.0105609	0.00788127	0.00592845	0.00450165	0.0028902	0.00188534
2899	0.010443	0.00766832	0.00592166	0.00449567	0.00318598	0.00198199
2898	0.010125	0.00755537	0.00591488	0.0044897	0.00328176	0.00187864
2897	0.00990711	0.00754242	0.00600809	0.00448373	0.00337754	0.00197528
2896	0.00968918	0.00752947	0.00590131	0.00447776	0.00337332	0.00207193
2895	0.00947126	0.00731652	0.00579453	0.00437179	0.0031691	0.00226858
2894	0.00935333	0.00730358	0.00568774	0.00436582	0.00306488	0.00256522
2893	0.0092354	0.00729063	0.00558096	0.00435985	0.00296066	0.00286187
2892	0.00901748	0.00717768	0.00527417	0.00425388	0.00275644	0.00285852
2891	0.00879955	0.00716473	0.00506739	0.00414791	0.00255222	0.00275516
2890	0.00858162	0.00685178	0.0045606	0.00404194	0.002348	0.00245181
2889	0.0084637	0.00653883	0.00425382	0.00393596	0.00234378	0.00234846
2888	0.00814577	0.00622588	0.00404703	0.00382999	0.00243956	0.0022451
2887	0.00792784	0.00611293	0.00414025	0.00392402	0.00263534	0.00234175
2886	0.00770991	0.00589998	0.00423347	0.00401805	0.00273112	0.0023384
2885	0.00769199	0.00588703	0.00432668	0.00411208	0.0028269	0.00243504
2884	0.00747406	0.00577408	0.0043199	0.00390611	0.00262268	0.00233169
2883	0.00735613	0.00586114	0.00431311	0.00380014	0.00241846	0.00232834
2882	0.00703821	0.00584819	0.00400633	0.00349417	0.00211424	0.00202498
2881	0.00692028	0.00603524	0.00369954	0.0034882	0.00191002	0.00192163
2880	0.00710235	0.00622229	0.00379276	0.00358223	0.0019058	0.00191828
2879	0.00738442	0.00650934	0.00408597	0.00377625	0.00210158	0.00201492
2878	0.0077665	0.00659639	0.00447919	0.00387028	0.00239736	0.00211157
2877	0.00784857	0.00658344	0.00477241	0.00376431	0.00259314	0.00210822
2876	0.00783064	0.00657049	0.00486562	0.00385834	0.00278892	0.00220486
2875	0.00771272	0.00645754	0.00475884	0.00395237	0.0027847	0.00220151
2874	0.00759479	0.00634459	0.00465205	0.0041464	0.00278048	0.00219816
2873	0.00747686	0.00623164	0.00444527	0.00394043	0.00267626	0.0020948
2872	0.00735893	0.0060187	0.00423848	0.00373446	0.00247204	0.00189145
2871	0.00734101	0.00610575	0.0041317	0.00352849	0.00236782	0.00188809
2870	0.00722308	0.0061928	0.00402491	0.00352252	0.0023636	0.00188474
2869	0.00730515	0.00647985	0.00411813	0.00381654	0.00245938	0.00208139
2868	0.00738723	0.0065669	0.00431134	0.00401057	0.00245516	0.00207803
2867	0.0075693	0.00655395	0.00440456	0.0040046	0.00245094	0.00187468
2866	0.00785137	0.006541	0.00439778	0.00409863	0.00224672	0.00177133
2865	0.00803344	0.00662805	0.00439099	0.00399266	0.0021425	0.00166797
2864	0.00841552	0.0070151	0.00468421	0.00418669	0.00243828	0.00176462
2863	0.00859759	0.00760215	0.00507742	0.00428072	0.00273406	0.00186127
2862	0.00907966	0.00818921	0.00557064	0.00447475	0.00312984	0.00185791
2861	0.00956174	0.00877626	0.00606385	0.00456878	0.00342562	0.00175456
2860	0.0103438	0.00956331	0.00655707	0.00486281	0.00382139	0.00195121
2859	0.0111259	0.0102504	0.00705028	0.00515683	0.00411717	0.00204785
2858	0.012008	0.0109374	0.0074435	0.00545086	0.00421295	0.0022445
2857	0.01329	0.0116245	0.00793672	0.00594489	0.00430873	0.00264115
2856	0.0145721	0.0122115	0.00852993	0.00623892	0.00430451	0.00293779
2855	0.0155542	0.0126986	0.00892315	0.00633295	0.00420029	0.00303444
2854	0.0162362	0.0128856	0.00891636	0.00612698	0.00389607	0.00293109
2853	0.0166183	0.0128727	0.00880958	0.00602101	0.00379185	0.00272773
2852	0.0166004	0.0124597	0.00840279	0.00561504	0.00358763	0.00242438
2851	0.0163825	0.0119468	0.00809601	0.00530907	0.00358341	0.00222103
2850	0.0160645	0.0114338	0.00768922	0.0050031	0.00347919	0.00211767
2849	0.0153466	0.0109209	0.00718244	0.00479712	0.00317497	0.00221432
2848	0.0145287	0.0104079	0.00657566	0.00469115	0.00297075	0.00231097
2847	0.0135108	0.00979497	0.00596887	0.00458518	0.00286653	0.00240761
2846	0.0121928	0.00888202	0.00526209	0.00447921	0.00276231	0.00230426
2845	0.0108749	0.00796907	0.0047553	0.00417324	0.00255809	0.00220091
2844	0.00965697	0.00715612	0.00424852	0.00386727	0.00225387	0.00209755
2843	0.00873905	0.00664317	0.00384173	0.0036613	0.00194965	0.0020942
2842	0.00802112	0.00623022	0.00343495	0.00335533	0.00164543	0.00199084
2841	0.00750319	0.00601728	0.00312816	0.00314936	0.00154121	0.00188749
2840	0.00728527	0.00580433	0.00302138	0.00314339	0.00183699	0.00188414
2839	0.00706734	0.00559138	0.00301459	0.00303741	0.00223277	0.00188078
2838	0.00674941	0.00517843	0.00300781	0.00283144	0.00262855	0.00197743
2837	0.00643149	0.00476548	0.00310103	0.00272547	0.00282433	0.00207408
2836	0.00581356	0.00445253	0.00309424	0.0024195	0.00262011	0.00187072
2835	0.00519563	0.00423958	0.00308746	0.00231353	0.00231589	0.00166737
2834	0.0047777	0.00402663	0.00288067	0.00210756	0.00191167	0.00136402
2833	0.00475978	0.00401368	0.00277389	0.00220159	0.00170745	0.00146066
2832	0.00524185	0.00400073	0.0027671	0.00229562	0.00160323	0.00165731
2831	0.00562392	0.00388778	0.00286032	0.00218965	0.00159901	0.00185396
2830	0.006006	0.00387484	0.00295353	0.00218368	0.00169479	0.0019506
2829	0.00588807	0.00376189	0.00294675	0.0019777	0.00159057	0.00184725
2828	0.00567014	0.00394894	0.00293997	0.00197173	0.00158635	0.0017439
2827	0.00525221	0.00403599	0.00283318	0.00196576	0.00148213	0.00154054
2826	0.00503429	0.00422304	0.0027264	0.00195979	0.00157791	0.00143719
2825	0.00491636	0.00421009	0.00251961	0.00195382	0.00167369	0.00143384
2824	0.00489843	0.00429714	0.00251283	0.00204785	0.00176947	0.00153048
2823	0.00478051	0.00418419	0.00240604	0.00204188	0.00176525	0.00152713
2822	0.00476258	0.00407124	0.00229926	0.00223591	0.00186103	0.00162378
2821	0.00484465	0.00405829	0.00239247	0.00232994	0.00205681	0.00162042
2820	0.00482672	0.00404534	0.00248569	0.00252397	0.00235259	0.00171707
2819	0.0049088	0.0038324	0.00247891	0.00261799	0.00254837	0.00161372
2818	0.00509087	0.00371945	0.00277212	0.00281202	0.00274415	0.00191036
2817	0.00537294	0.0036065	0.00286534	0.00290605	0.00273993	0.00210701
2816	0.00535502	0.00349355	0.00275855	0.00280008	0.00263571	0.00210366
2815	0.00533709	0.0035806	0.00255177	0.00259411	0.00243149	0.0020003
2814	0.00511916	0.00356765	0.00224498	0.00248814	0.00212726	0.00189695
2813	0.00500123	0.0036547	0.0021382	0.00228217	0.00192304	0.00169359
2812	0.00478331	0.00364175	0.00223141	0.0023762	0.00171882	0.00169024
2811	0.00456538	0.0037288	0.00232463	0.00237023	0.0014146	0.00168689
2810	0.00444745	0.00381585	0.00251784	0.00246426	0.00141038	0.00178353
2809	0.00442953	0.00390291	0.00251106	0.00225828	0.00140616	0.00178018
2808	0.0045116	0.00388996	0.00250428	0.00215231	0.00150194	0.00177683
2807	0.00479367	0.00397701	0.00259749	0.00214634	0.00179772	0.00187347
2806	0.00477574	0.00386406	0.00259071	0.00214037	0.0017935	0.00187012
2805	0.00475782	0.00375111	0.00248392	0.0023344	0.00188928	0.00196677
2804	0.00453989	0.00343816	0.00227714	0.00232843	0.00178506	0.00176341
2803	0.00442196	0.00332521	0.00207035	0.00222246	0.00178084	0.00166006
2802	0.00430404	0.00321226	0.00196357	0.00191649	0.00177662	0.00145671
2801	0.00428611	0.00309931	0.00195678	0.00181052	0.0017724	0.00145335
2800	0.00446818	0.00318636	0.00215	0.00200455	0.00186818	0.00155

## Sheet: Section B Processed Stearic
	Raw values
	Time / mins	0	5	10	15	20	25	30	40	50	60
HP TiO2	Integrated area / cm-1	0.834893	0.652262	0.476421	0.323066	0.220074	0.136597
P TiO2	Integrated area / cm-1	0.467361	0.426846	0.394924	0.35653	0.309111	0.283399	0.217859	0.165477	0.127258	0.056531
D TiO2	Integrated area / cm-1	0.430505	0.41922	0.422602	0.388112	0.367191	0.407963	0.334879	0.337748	0.308401	0.295315
	Conversion to molecules
	Time / mins	0	5	10	15	20	25	30	40	50	60
HP TiO2	Molecules / cm-2	1.03826e+16	8111463333333333	5924720205128205	4.01762e+15	2736823910256410	1698700064102564		0
P TiO2	Molecules / cm-2	5812053461538461	5308210589743590	4911235602564102	4.43377e+15	3.84407e+15	3524322141025641	2709278397435897	2057861217948718	1.58257e+15	7.03014e+14
D TiO2	Molecules / cm-2	5353714782051282	5213379410256410	5255438858974359	4826516051282051	4566347128205129	5073381051282051	4164520773076923	4200197124358974	3835249423076923	3672507051282051
	Initial Rate
	molecules /cm2/min	moles /cm2/min		FQE / molecules per photon			Ratio to D-TiO2
HP TiO2	425600000000000	7.06977e-10		0.000695425			14.3658
P TiO2	96208000000000	1.59814e-10		0.000157203			3.24742
D TiO2	29626000000000	4.92126e-11		4.84085e-05			1
	The light intensity is 5.6 mW cm-2
	This is equivalwent to	6.12e+17	photons per min-1 cm-2
HPTiO2	Low Light intensity final measurement, with 1.1 mWcm-2				equivalent to		1.2e+17	photons per min per cm2
	Time / mins	0	30	45	60	75	105	135	165	225
	Integrated area / cm-1	2.82057	2.43307	1.98543	1.85269	1.76625	1.17572	0.908131	0.676631	0.39885
	Molecules / cm-2	3.50764e+16	3.02574e+16	2.46906e+16	2.30398e+16	2.19649e+16	1.46212e+16	1.12934e+16	8414516826923077	4960057692307714
		211000000000000	molecules / cm2 / min
	FQE	0.00175833

## Sheet: Section B Accessible Surface 
	Callibration Data
	Dye Conc/ mol dm-3	Absorbtion
	0	0.0530812
	5.08e-08	0.0578656
	1.015e-07	0.0637326
	2.03e-07	0.0724011
	3.045e-07	0.0790411
	5.075e-07	0.0980931
	7.6125e-07	0.119106
	1.015e-06	0.145914
	Measurements		Dye extracted using 5ml of HCl solution in each extraction
												Total apparent surface area / cm2
	1st Extraction				2nd Extraction
	Absorbtion	Dye conc	Moles	Err	Absorbtion	Dye conc	Moles	Err	Total Moles	Err		Surface area	Err	Coated area	Err	Surface area not coated with TiO2
D-TiO2	0.0719668	2.09388e-07	1.04694e-09	1.45476e-11	0.053592	3.95891e-09	1.97946e-11	3.69356e-13	1.06674e-09	1.49169e-11		6.932	0.09	2.45	0.127	4.482
P-TiO2	0.0845972	3.50597e-07	1.75298e-09	2.07215e-11	0.0608697	8.53236e-08	4.26618e-10	7.00871e-12	2.1796e-09	2.77302e-11		7.344	0.09555	2.6	0.135	4.744
HP-TiO2	0.172449	1.33278e-06	6.66389e-09	3.86427e-11	0.0666007	1.49396e-07	7.46982e-10	1.12158e-11	7.41088e-09	4.98585e-11		6.696	0.087	2.34	0.121	4.356
Blank	0.0600566	7.62329e-08	3.81164e-10	6.34675e-12	0.0554864	2.51382e-08	1.25691e-10	2.26526e-12	5.06856e-10	8.61201e-12		5.38	0.07
	Callibration of dye coverage using blank sample
		Area covered per mole
		cm2 mol-1	Err
		1.06145e+10	2.27156e+08
Determination of accessible surface area
	D-TiO2	P-TiO2	HP-TiO2
Total Moles	1.06674e-09	2.1796e-09	7.41088e-09
Total area of Dye/ cm2	11.3228	23.1353	78.6625
Accessible area of TiO2 coated surface (Total - area of rear and sides unocated in TiO2) /cm2	6.84084	18.3913	74.3065
Accessible surface area ratio	2.79218	7.07358	31.7549
Accessible surface area ratio relative to D-TiO2	1	2.53336	11.3728
